# Supplementary material for: Paleozoic sediment dispersal before and during the collision between Laurentia and Gondwana in the Fort Worth Basin, USA
Source: Oxford University Press journal article supplement (doi:10.1130/ges01480.1), 2017-12-20
Supplement: ges01480_suppdata.xls [file ges01480_suppdata.xls]

## Sheet: PlotDat3
Source sheet	Sheet1	0.748081	0.0912721	0.670251	0.0840077	0.703532	0.087376	0.737476	0.0907549	0.772097	0.0941442	0.807407	0.097544	0.843421	0.100954	0.64	0.0810364	0.64	0.0808907	0.64	0.0811822	0.636279	0.0806498	0.766127	0.0924061	0.762332	0.0941157	0.76272	0.093625	0.753119	0.0918066	0.761171	0.0928742	0.759016	0.0929723	0.75783	0.0929149	0.751849	0.091824	0.769779	0.09435	0.756294	0.0930059	0.793336	0.0972429	0.768695	0.0941591	0.770848	0.09416
Plot name	Concordia1	0.744138	0.092202	0.670194	0.08404	0.703471	0.0874097	0.737412	0.0907898	0.772028	0.0941805	0.807335	0.0975817	0.843345	0.100994	0.64	0.0810364	0.64	0.0808907	0.64	0.0811822	0.668829	0.0840077	0.765718	0.0926092	0.761917	0.0942406	0.762355	0.0937839	0.752805	0.0919642	0.760777	0.0930449	0.758539	0.0931275	0.757584	0.0930217	0.75156	0.0919683	0.76911	0.0945002	0.755844	0.093083	0.792419	0.097376	0.768086	0.0942996	0.770407	0.0945024
Plot Type	1	0.746757	0.0922646	0.670025	0.0840696	0.703293	0.0874405	0.737223	0.090822	0.771829	0.0942139	0.807125	0.0976164	0.843123	0.101029	0.647134	0.0817758	0.647134	0.0816287	0.647134	0.081923	0.702025	0.087376	0.764539	0.0927539	0.760724	0.0942765	0.761308	0.0938765	0.751899	0.092077	0.759647	0.0931442	0.75717	0.0931832	0.756878	0.0930837	0.750717	0.0920834	0.767179	0.0945004	0.754558	0.0930599	0.789765	0.0972969	0.76633	0.0943041	0.769144	0.0947824
1st free col	85	0.739257	0.0909391	0.66976	0.0840942	0.703012	0.0874662	0.736926	0.0908486	0.771516	0.0942416	0.806794	0.0976451	0.842775	0.101059	0.654299	0.0825157	0.654299	0.0823672	0.654299	0.0826642	0.735883	0.0907549	0.76264	0.0928338	0.758807	0.0942217	0.759626	0.0938986	0.75044	0.0921401	0.757829	0.0931677	0.754969	0.0931369	0.755743	0.0930984	0.749357	0.0921643	0.764071	0.0943507	0.752539	0.0929387	0.785488	0.097009	0.763503	0.0941727	0.767083	0.0949947
Sigma Level	1	0.743926	0.0914112	0.66942	0.0841119	0.702651	0.0874846	0.736545	0.0908677	0.771113	0.0942615	0.806369	0.0976657	0.842326	0.101081	0.661496	0.0832561	0.661496	0.0831061	0.661496	0.083406	0.770413	0.0941442	0.760105	0.0928455	0.756249	0.0940786	0.757381	0.0938493	0.748493	0.0921507	0.755404	0.0931144	0.752031	0.0929907	0.754228	0.093065	0.74754	0.0922075	0.759922	0.0940576	0.749951	0.092729	0.779777	0.0965249	0.75973	0.093911	0.764263	0.0951351
Absolute Errs	FALSE	0.738128	0.09085	0.669031	0.084121	0.70224	0.0874941	0.736109	0.0908777	0.770653	0.0942718	0.805884	0.0976765	0.841815	0.101092	0.668724	0.0839969	0.668724	0.0838456	0.668724	0.0841482	0.805631	0.097544	0.757044	0.0927884	0.753162	0.0938535	0.754672	0.0937307	0.746142	0.0921083	0.752477	0.0929868	0.748487	0.0927509	0.752399	0.092985	0.745345	0.0922111	0.754914	0.0936339	0.747004	0.092448	0.77288	0.0958657	0.755176	0.0935304	0.760741	0.0952008
Symbol Type	1	0.747058	0.0919986	0.668626	0.084121	0.701811	0.0874941	0.735656	0.0908777	0.770174	0.0942718	0.805378	0.0976765	0.841283	0.101092	0.675983	0.0847383	0.675983	0.0845857	0.675983	0.084891	0.841549	0.100954	0.753592	0.092665	0.74968	0.0935563	0.751617	0.0935481	0.74349	0.0920148	0.749176	0.0927902	0.744489	0.092428	0.750338	0.0928618	0.742868	0.092175	0.749265	0.0930981	0.743936	0.0921183	0.765099	0.0950603	0.750038	0.0930476	0.756583	0.0951905
Inverse Plot	FALSE	0.738894	0.0913012	0.668238	0.0841119	0.7014	0.0874846	0.735221	0.0908677	0.769714	0.0942615	0.804893	0.0976657	0.840771	0.101081	0.683274	0.0854802	0.683274	0.0853262	0.683274	0.0856343	IsoLine	IsoLine	0.749899	0.0924808	0.745956	0.0931998	0.748349	0.0933093	0.740653	0.0918743	0.745646	0.0925334	0.740214	0.0920362	0.748133	0.092701	0.740218	0.0921006	0.743222	0.0924737	0.740997	0.0917666	0.756774	0.0941438	0.744543	0.0924836	0.751873	0.0951045
Color Plot	TRUE	0.740254	0.0910695	0.667897	0.0840942	0.701039	0.0874662	0.734839	0.0908486	0.769311	0.0942416	0.804468	0.0976451	0.840323	0.101059	0.690596	0.0862226	0.690596	0.0860672	0.690596	0.0863781			0.746126	0.0922437	0.742152	0.0927997	0.745012	0.0930249	0.737755	0.091693	0.742041	0.0922276	0.735847	0.0915925	0.745881	0.0925094	0.737509	0.0919913	0.73705	0.0917878	0.738424	0.0914215	0.748269	0.0931564	0.73893	0.0918632	0.7467	0.0949445
3D plot	FALSE	0.745517	0.0918475	0.667632	0.0840696	0.700758	0.0874405	0.734542	0.090822	0.768997	0.0942139	0.804137	0.0976164	0.839974	0.101029	0.69795	0.0869656	0.69795	0.0868087	0.69795	0.0871224			0.742439	0.0919641	0.738435	0.0923735	0.741751	0.0927073	0.734922	0.0914787	0.738518	0.091886	0.73158	0.0911164	0.74368	0.0922956	0.734861	0.0918519	0.731017	0.0910706	0.736425	0.091111	0.739956	0.0921411	0.733444	0.0912135	0.741165	0.0947135
Linear	FALSE	0.752653	0.0925195	0.667464	0.08404	0.70058	0.0874097	0.734354	0.0907898	0.768798	0.0941805	0.803927	0.0975817	0.839753	0.100994	0.705337	0.087709	0.705337	0.0875507	0.705337	0.0878672			0.738999	0.0916543	0.734968	0.0919398	0.738709	0.0923703	0.732279	0.0912408	0.735232	0.0915237	0.727599	0.0906286	0.741627	0.0920687	0.732389	0.0916883	0.725389	0.0903534	0.735163	0.0908601	0.732197	0.0911423	0.728325	0.0905628	0.735377	0.094416
Data Range	AO:AS	0.741845	0.0911915	0.667406	0.0840077	0.700519	0.087376	0.734289	0.0907549	0.76873	0.0941442	0.803855	0.097544	0.839677	0.100954	0.712755	0.0884529	0.712755	0.0882933	0.712755	0.0886125			0.735955	0.0913278	0.731901	0.0915176	0.736019	0.0920287	0.729941	0.0909897	0.732325	0.0911565	0.724079	0.0901505	0.739812	0.0918388	0.730202	0.0915079	0.720409	0.0896674	0.73474	0.0906892	0.725333	0.0902038	0.723798	0.0899395	0.729449	0.0940579
Filled Symbols	FALSE	0.728136	0.0912993	0.667464	0.0839754	0.70058	0.0873424	0.734354	0.0907199	0.768798	0.0941079	0.803927	0.0975064	0.839753	0.100915	0.720206	0.0891973	0.720206	0.0890363	0.720206	0.0893584			0.733441	0.0909989	0.729369	0.0911253	0.733798	0.0916974	0.72801	0.0907364	0.729926	0.0908005	0.721172	0.089703	0.738313	0.0916158	0.728394	0.0913184	0.716298	0.0890427	0.73519	0.0906121	0.719662	0.0893664	0.720059	0.089371	0.723494	0.0936461
ConcAge	TRUE	0.745546	0.09149	0.667632	0.0839458	0.700758	0.0873116	0.734542	0.0906878	0.768997	0.0940745	0.804137	0.0974717	0.839974	0.100879	0.727689	0.0899423	0.727689	0.0897799	0.727689	0.0901047			0.731568	0.0906819	0.727482	0.09078	0.732144	0.0913909	0.726571	0.090492	0.728138	0.0904711	0.719007	0.0893056	0.737196	0.0914096	0.727046	0.0911282	0.713233	0.0885066	0.736476	0.0906351	0.715434	0.0886669	0.717272	0.088882	0.71763	0.0931886
ConcSwap	FALSE	0.743946	0.0915796	0.667897	0.0839212	0.701039	0.0872859	0.734839	0.0906611	0.769311	0.0940468	0.804468	0.0974429	0.840323	0.10085	0.735205	0.0906878	0.735205	0.0905239	0.735205	0.0908516			0.730415	0.0903907	0.726324	0.0904969	0.731128	0.0911226	0.725686	0.0902671	0.72704	0.0901828	0.717677	0.0889757	0.736511	0.0912292	0.726215	0.0909455	0.711349	0.0880825	0.738495	0.0907564	0.712832	0.0881357	0.715559	0.088494	0.711971	0.0926944
1st Symbol-row	1	0.742037	0.0914405	0.668238	0.0839035	0.7014	0.0872675	0.735221	0.090642	0.769714	0.0940269	0.804893	0.0974224	0.840771	0.100828	0.742753	0.0914337	0.742753	0.0912685	0.742753	0.091599			0.730035	0.090138	0.725944	0.0902883	0.730795	0.0909041	0.725394	0.0900716	0.726681	0.0899482	0.717241	0.0887277	0.736286	0.0910823	0.725938	0.0907784	0.710728	0.087789	0.741083	0.0909661	0.71197	0.0877961	0.714995	0.0882239	0.706626	0.0921729
		0.734285	0.0907014	0.668626	0.0838944	0.701811	0.087258	0.735656	0.0906321	0.770174	0.0940166	0.805378	0.0974116	0.841283	0.100817	0.750334	0.0921802	0.750334	0.0920135	0.750334	0.0923468			0.730444	0.0899349	0.726359	0.0901633	0.73116	0.0907452	0.725708	0.089914	0.727075	0.0897775	0.717718	0.0885725	0.736532	0.0909755	0.726227	0.0906341	0.711398	0.0876388	0.74403	0.0912471	0.712887	0.087663	0.715604	0.0880834	0.7017	0.0916345
		0.750903	0.0916079	0.669031	0.0838944	0.70224	0.087258	0.736109	0.0906321	0.770653	0.0940166	0.805884	0.0974116	0.841815	0.100817	0.757948	0.0929272	0.757948	0.0927591	0.757948	0.0930952			0.731624	0.0897902	0.727551	0.0901275	0.732207	0.0906526	0.726614	0.0898012	0.728205	0.0896783	0.719087	0.0885168	0.737238	0.0909134	0.72707	0.090519	0.713329	0.0876386	0.747098	0.0915768	0.715541	0.0877421	0.71736	0.0880789	0.697288	0.0910896
		0.75345	0.0924135	0.66942	0.0839035	0.702651	0.0872675	0.736545	0.090642	0.771113	0.0940269	0.806369	0.0974224	0.842326	0.100828	0.765596	0.0936747	0.765596	0.0935052	0.765596	0.0938442			0.733522	0.0897103	0.729468	0.0901823	0.733889	0.0906305	0.728073	0.0897381	0.730023	0.0896547	0.721288	0.0885631	0.738374	0.0908988	0.72843	0.090438	0.716437	0.0877883	0.750037	0.0919285	0.719817	0.08803	0.720187	0.0882103	0.693477	0.0905487
		0.741465	0.0913325	0.66976	0.0839212	0.703012	0.0872859	0.736926	0.0906611	0.771516	0.0940468	0.806794	0.0974429	0.842775	0.10085	0.773276	0.0944227	0.773276	0.0942518	0.773276	0.0945936			0.736057	0.0896986	0.732026	0.0903253	0.736134	0.0906798	0.73002	0.0897275	0.732448	0.089708	0.724225	0.0887093	0.739889	0.0909322	0.730247	0.0903948	0.720586	0.0880814	0.75261	0.0922735	0.725529	0.0885141	0.72396	0.088472	0.69034	0.0900225
		0.73102	0.0906032	0.670025	0.0839458	0.703293	0.0873116	0.737223	0.0906878	0.771829	0.0940745	0.807125	0.0974717	0.843123	0.100879	0.78099	0.0951712	0.78099	0.0949989	0.78099	0.0953435			0.739118	0.0897557	0.735114	0.0905504	0.738843	0.0907984	0.732371	0.0897699	0.735375	0.0898357	0.72777	0.0889491	0.741717	0.0910122	0.732442	0.0903912	0.725594	0.0885051	0.754609	0.0925841	0.732426	0.0891733	0.728514	0.0888526	0.687939	0.0895211
		0.744135	0.0917078	0.670194	0.0839754	0.703471	0.0873424	0.737412	0.0907199	0.772028	0.0941079	0.807335	0.0975064	0.843345	0.100915	0.788738	0.0959203	0.788738	0.0957466	0.788738	0.096094			0.74257	0.0898791	0.738596	0.0908477	0.741898	0.090981	0.735023	0.0898633	0.738676	0.0900322	0.731767	0.089272	0.743779	0.0911353	0.734919	0.0904274	0.731243	0.0890409	0.755871	0.092835	0.740207	0.0899787	0.733652	0.0893354	0.68632	0.0890543
		0.747237	0.0918323	0.670251	0.0840077	0.703532	0.087376	0.737476	0.0907549	0.772097	0.0941442	0.807407	0.097544	0.843421	0.100954	0.796519	0.0966698	0.796519	0.0964947	0.796519	0.0968449			0.746263	0.0900633	0.74232	0.0912042	0.745166	0.0912198	0.73786	0.0900038	0.742206	0.090289	0.736043	0.0896639	0.745984	0.0912962	0.737569	0.0905018	0.737286	0.0896654	0.756294	0.0930059	0.748532	0.0908952	0.739147	0.0898994	0.685516	0.0886312
		0.743183	0.091505	ConcTikEll	ConcTikEll	ConcTikEll	ConcTikEll	ConcTikEll	ConcTikEll	ConcTikEll	ConcTikEll	ConcTikEll	ConcTikEll	ConcTikEll	ConcTikEll	0.804334	0.0974199	0.804334	0.0972433	0.804334	0.0975964			0.750036	0.0903004	0.746123	0.0916042	0.748503	0.0915042	0.740759	0.0901852	0.745811	0.0905949	0.74041	0.0901075	0.748236	0.0914877	0.740278	0.090611	0.743458	0.0903512			0.757037	0.0918826	0.74476	0.0905198	0.685541	0.0882601
		0.739197	0.0909445													0.812183	0.0981704	0.812183	0.0979925	0.812183	0.0983484			0.753723	0.09058	0.74984	0.0920304	0.751764	0.0918218	0.743591	0.0903995	0.749334	0.0909364	0.744677	0.0905837	0.750436	0.0917016	0.742926	0.0907505	0.749491	0.0910684			0.76535	0.0928979	0.750246	0.0911695	0.686395	0.0879481
		0.73811	0.0911942													0.820066	0.0989215	0.820066	0.0987421	0.820066	0.0991009			0.757164	0.0908898	0.753308	0.0924641	0.754806	0.0921588	0.746234	0.0906374	0.75262	0.0912987	0.748657	0.0910714	0.752489	0.0919285	0.745398	0.090914	0.755119	0.0917857			0.773109	0.0938967	0.755365	0.0918202	0.688061	0.0877013
		0.742175	0.0912303													0.827984	0.0996731	0.827984	0.0994923	0.827984	0.0998539			0.760207	0.0912163	0.756375	0.0928864	0.757496	0.0925004	0.748572	0.0908884	0.755527	0.0916659	0.752178	0.0915495	0.754305	0.0921584	0.747585	0.0910945	0.760098	0.0924716			0.779973	0.0948352	0.759892	0.0924435	0.690507	0.0875245
		0.745457	0.0919428													0.835936	0.100425	0.835936	0.100243	0.835936	0.100607			0.762721	0.0915452	0.758907	0.0932787	0.759717	0.0928317	0.750503	0.0911417	0.757926	0.0920219	0.755084	0.0919971	0.755804	0.0923814	0.749393	0.091284	0.76421	0.0930963			0.785643	0.0956726	0.763631	0.093012	0.693686	0.0874213
		0.748261	0.0919264													0.843922	0.101178	0.843922	0.100994	0.843922	0.101362			0.764595	0.0918622	0.760793	0.0936239	0.761371	0.0931382	0.751942	0.0913862	0.759714	0.0923513	0.75725	0.0923944	0.75692	0.0925876	0.750742	0.0914742	0.767275	0.0936324			0.789872	0.0963721	0.766418	0.093501	0.697535	0.0873935
		IsoLine	IsoLine													0.851944	0.101931	0.851944	0.101746	0.851944	0.102116			0.765747	0.0921534	0.761952	0.0939071	0.762387	0.0934065	0.752827	0.091611	0.760812	0.0926396	0.75858	0.0927243	0.757606	0.092768	0.751572	0.0916569	0.769159	0.0940565			0.792474	0.0969033	0.768131	0.093889	0.70198	0.0874417
																0.86	0.102685	0.86	0.102498	0.86	0.102871			0.766127	0.0924061	0.762332	0.0941157	0.76272	0.093625	0.753119	0.0918066	0.761171	0.0928742	0.759016	0.0929723	0.75783	0.0929149	0.751849	0.091824	0.769779	0.09435			0.793336	0.0972429	0.768695	0.0941591	0.706934	0.087565
																0.86	0.102685	0.86	0.102498	0.86	0.102871																											0.712301	0.087761
																IsoLine	IsoLine	ConcBand	ConcBand	ConcBand	ConcBand																											0.717976	0.0880259
																																																0.723849	0.0883545
																																																0.729805	0.0887404
																																																0.735728	0.0891761
																																																0.741504	0.0896531
																																																0.74702	0.0901622
																																																0.752168	0.0906934
																																																0.756848	0.0912364
																																																0.76097	0.0917806
																																																0.764452	0.0923155
																																																0.767228	0.0928306
																																																0.769242	0.0933158
																																																0.770457	0.0937619
																																																0.770848	0.09416
[truncated: 34 more columns]

## Sheet: PlotDat4
Source sheet	datatable	0.747857	0.0921494	0.282796	0.04	0.217708	0.0315113	0.756267	0.0927829	1.95819	0.183849	1.95271	0.182883	1.93783	0.185286	2.0434	0.19667	2.08894	0.198994	2.06526	0.196643	1.92793	0.175332	1.93933	0.183388	2.03332	0.191226	2.07734	0.193723	2.00651	0.184608	2.04836	0.190696	1.98502	0.187144	2.09493	0.189134	2.12342	0.181588	2.11699	0.190765	2.06614	0.182749	2.32922	0.209196	2.53623	0.215717	2.47062	0.213372
Plot name	Concordia2	1.8621	0.182592	0.285298	0.0403257	0.343738	0.0476374	0.755916	0.0928988	1.95428	0.1847	1.94825	0.184146	1.93421	0.186194	2.03773	0.19694	2.0827	0.199902	2.06222	0.197068	1.92375	0.176171	1.93752	0.183816	2.03071	0.191851	2.07195	0.195016	2.0036	0.185267	2.04556	0.191469	1.98185	0.187349	2.09124	0.18965	2.11874	0.18302	2.1124	0.191992	2.06177	0.183752	2.32304	0.209736	2.53105	0.216919	2.46735	0.214218
Plot Type	1	1.84374	0.179322	0.351464	0.0485839	0.482812	0.0640155	0.754911	0.0929541	1.94291	0.185381	1.93532	0.185019	1.92378	0.186575	2.02133	0.196158	2.06473	0.199723	2.05345	0.196964	1.91154	0.17685	1.93232	0.183978	2.0232	0.192099	2.05631	0.195412	1.99511	0.185784	2.03746	0.19191	1.9727	0.186982	2.08048	0.190088	2.10497	0.184253	2.09915	0.192681	2.04904	0.184529	2.30518	0.209223	2.51595	0.21783	2.45788	0.214796
1st free col	215	1.8502	0.179691	0.421037	0.0569077	0.636279	0.0806498	0.753336	0.0929442	1.92499	0.185835	1.91497	0.185431	1.90739	0.186398	1.99552	0.194386	2.03647	0.198472	2.03967	0.196338	1.8923	0.177315	1.92413	0.183861	2.0114	0.191948	2.03109	0.194892	1.98173	0.186117	2.02472	0.191984	1.9583	0.186074	2.06351	0.190414	2.0827	0.185234	2.07831	0.192776	2.02898	0.185016	2.27709	0.207698	2.49218	0.218375	2.44296	0.215059
Sigma Level	1	1.90524	0.183947	0.494191	0.0652976	0.805631	0.097544	0.751316	0.0928699	1.90198	0.186027	1.88886	0.185347	1.88637	0.185678	1.9624	0.191769	2.00022	0.196249	2.02199	0.195243	1.8676	0.177526	1.91363	0.183475	1.99626	0.191412	1.99739	0.193481	1.96456	0.186239	2.00837	0.191687	1.93982	0.184697	2.04172	0.190599	2.0529	0.185921	2.05157	0.192269	2.00321	0.185174	2.24103	0.205284	2.46164	0.218511	2.42381	0.214985
Absolute Errs	FALSE	1.93782	0.186483	0.571111	0.073754	0.99251	0.114702	0.749017	0.0927372	1.87573	0.18594	1.85909	0.184776	1.86242	0.184473	1.92465	0.188518	1.95891	0.193235	2.00185	0.193765	1.83942	0.177469	1.90167	0.18285	1.97901	0.190532	1.9567	0.191238	1.94497	0.186141	1.98975	0.19104	1.91875	0.182963	2.01687	0.190631	2.01688	0.186282	2.02109	0.191201	1.97384	0.184991	2.19994	0.202177	2.42683	0.218227	2.40198	0.214582
Symbol Type	1	1.99155	0.190532	0.651991	0.0822776	1.19873	0.132129	0.746623	0.0925569	1.84839	0.185582	1.82807	0.183763	1.83748	0.18288	1.88532	0.184897	1.9159	0.189674	1.98087	0.192026	1.81006	0.177146	1.88922	0.182038	1.96105	0.189382	1.91078	0.188263	1.92456	0.18583	1.97035	0.190098	1.89681	0.181013	1.99096	0.190505	1.97621	0.186303	1.98935	0.189659	1.94323	0.184481	2.15714	0.198629	2.39055	0.217545	2.37923	0.21388
Inverse Plot	FALSE	1.82478	0.174197	0.737034	0.0908688	1.42629	0.149828	0.744329	0.0923436	1.82215	0.184982	1.79832	0.18239	1.81357	0.18103	1.84761	0.181199	1.87466	0.185854	1.96076	0.190166	1.78189	0.176584	1.87727	0.181103	1.94383	0.188054	1.86165	0.184686	1.90498	0.185331	1.95175	0.188936	1.87577	0.179004	1.96611	0.190232	1.93267	0.185982	1.95892	0.187768	1.91386	0.183686	2.1161	0.194928	2.35575	0.216521	2.35742	0.212938
Color Plot	TRUE	1.89557	0.180533	0.826456	0.0995283	1.67741	0.167804	0.742322	0.0921146	1.79915	0.184189	1.77226	0.180768	1.79263	0.17907	1.81457	0.177723	1.83854	0.182086	1.94314	0.188335	1.7572	0.175829	1.86681	0.180123	1.92875	0.186655	1.81145	0.180662	1.88782	0.184685	1.93545	0.187648	1.85734	0.1771	1.94432	0.189834	1.88816	0.185334	1.93225	0.185681	1.88812	0.182669	2.08014	0.191372	2.32524	0.215237	2.3383	0.211832
3D plot	FALSE	1.97021	0.187184	0.920481	0.108256	1.95452	0.186061	0.740762	0.0918884	1.78125	0.183266	1.75198	0.17903	1.77635	0.177161	1.78887	0.174752	1.81046	0.178674	1.92944	0.186682	1.73798	0.174942	1.85868	0.179175	1.91702	0.185299	1.76238	0.176368	1.87446	0.183944	1.92278	0.186339	1.84301	0.175454	1.92736	0.189344	1.84463	0.184386	1.91152	0.183566	1.86809	0.181514	2.05218	0.188251	2.3015	0.213799	2.32343	0.21065
Linear	FALSE	1.83721	0.174476	1.01935	0.117054	2.2603	0.204603	0.739778	0.0916833	1.7699	0.182288	1.73914	0.177315	1.76605	0.175457	1.7726	0.172526	1.7927	0.175894	1.92078	0.185342	1.72579	0.173995	1.85354	0.178338	1.90961	0.184095	1.71657	0.171991	1.86599	0.183168	1.91476	0.185114	1.83393	0.1742	1.9166	0.188801	1.80397	0.18318	1.8984	0.181596	1.85539	0.180314	2.03448	0.185816	2.28646	0.212322	2.31401	0.20949
Data Range	G8:K110	1.9348	0.183514	1.1233	0.125921	2.59774	0.223435	0.739448	0.091516	1.76602	0.181335	1.73477	0.175762	1.76258	0.174096	1.76708	0.171225	1.7867	0.173972	1.91785	0.184421	1.72162	0.173063	1.8518	0.177679	1.9071	0.183142	1.67604	0.167723	1.8631	0.18242	1.91204	0.184074	1.83085	0.17344	1.91292	0.188249	1.76798	0.181769	1.89395	0.17993	1.85105	0.179166	2.02847	0.184266	2.28132	0.210925	2.3108	0.208444
Filled Symbols	FALSE	1.9802	0.187385	1.23261	0.134859	2.97009	0.242562	0.739799	0.0914	1.76992	0.180484	1.73923	0.174499	1.7662	0.173189	1.77275	0.170955	1.79294	0.173064	1.92089	0.183996	1.72581	0.172224	1.85361	0.17725	1.90971	0.182517	1.64255	0.16375	1.86601	0.181761	1.91485	0.183302	1.83402	0.173235	1.91661	0.187733	1.73821	0.180214	1.89854	0.178703	1.85542	0.178163	2.03465	0.183726	2.2865	0.209723	2.31406	0.207598
ConcAge	FALSE	1.90793	0.180292	1.34754	0.143868	3.38099	0.261987	0.740803	0.0913447	1.78129	0.179804	1.75216	0.173626	1.77663	0.172808	1.78915	0.171737	1.81091	0.173243	1.92966	0.1841	1.73802	0.171545	1.85882	0.177088	1.91722	0.182269	1.61757	0.160246	1.8745	0.181244	1.92295	0.182861	1.84317	0.173601	1.92737	0.187294	1.71598	0.178584	1.91179	0.178014	1.86816	0.177387	2.05251	0.184239	2.3016	0.208812	2.32354	0.207021
ConcSwap	FALSE	2.00392	0.188691	1.46839	0.152948	3.83441	0.281716	0.742379	0.0913546	1.79921	0.179349	1.7725	0.173214	1.79301	0.172984	1.81496	0.173509	1.83917	0.174495	1.94344	0.184726	1.75725	0.17108	1.867	0.177205	1.92902	0.18242	1.60219	0.157363	1.88788	0.180911	1.93569	0.182786	1.85757	0.17451	1.94434	0.186969	1.70224	0.17695	1.93263	0.177919	1.88822	0.176899	2.0806	0.185764	2.32537	0.208267	2.33846	0.206758
1st Symbol-row	1	1.91052	0.178485	1.59546	0.1621	4.33477	0.301754	0.744398	0.0914289	1.82222	0.179157	1.79862	0.173298	1.81404	0.173705	1.84808	0.176126	1.87542	0.176718	1.96112	0.185821	1.78196	0.170868	1.8775	0.177591	1.94416	0.182957	1.59708	0.155229	1.90505	0.180788	1.95203	0.183084	1.87605	0.175887	1.96613	0.186783	1.69761	0.175383	1.95937	0.178426	1.91398	0.176741	2.11666	0.188178	2.35591	0.208131	2.35761	0.206831
		2.00547	0.185347	1.72907	0.171325	IsoLine	IsoLine	0.746698	0.0915616	1.84847	0.179244	1.82839	0.173869	1.83799	0.17491	1.88583	0.179377	1.91672	0.179732	1.98126	0.187299	1.81013	0.170926	1.88946	0.178216	1.9614	0.183836	1.60247	0.153936	1.92464	0.180887	1.97066	0.18373	1.89711	0.177621	1.99098	0.186752	1.70229	0.173951	1.98985	0.179494	1.94335	0.176924	2.15775	0.191285	2.39072	0.208415	2.37944	0.207235
		1.9586	0.180958	1.86957	0.180623			0.749092	0.0917419	1.87582	0.179602	1.85941	0.174882	1.86293	0.176502	1.92515	0.182998	1.95974	0.183293	2.00224	0.189038	1.83949	0.171249	1.90192	0.179029	1.97937	0.184986	1.61811	0.15354	1.94505	0.181198	1.99006	0.184673	1.91905	0.179571	2.01688	0.186878	1.71606	0.172718	2.02159	0.181036	1.97396	0.177434	2.20055	0.194833	2.427	0.209097	2.40218	0.207936
		2.17884	0.196731	2.01729	0.189995			0.751385	0.0919552	1.90205	0.180202	1.88915	0.176255	1.88684	0.178353	1.96287	0.186696	2.00097	0.187112	2.02235	0.190898	1.86766	0.171811	1.91386	0.179963	1.99659	0.186314	1.64333	0.154059	1.96463	0.181697	2.00866	0.185835	1.94009	0.18158	2.04174	0.187151	1.73834	0.171736	2.05202	0.182927	2.00333	0.17823	2.24159	0.198534	2.4618	0.210121	2.424	0.208878
		2.40878	0.213321	2.17262	0.199441			0.753393	0.0921843	1.92506	0.180996	1.91522	0.177877	1.90778	0.180312	1.99591	0.190172	2.0371	0.19088	2.03997	0.192729	1.89236	0.172566	1.92432	0.180944	2.01167	0.187713	1.67702	0.155471	1.98179	0.182343	2.02495	0.187123	1.95853	0.183484	2.06352	0.187548	1.76813	0.17105	2.07869	0.185014	2.02907	0.179246	2.27755	0.20209	2.49231	0.211405	2.44311	0.209985
		2.39071	0.210908	2.33594	0.208962			0.754952	0.0924105	1.94296	0.181919	1.9355	0.179615	1.92406	0.182221	2.0216	0.193143	2.06517	0.194293	2.05366	0.194381	1.91158	0.173453	1.93245	0.181891	2.02339	0.189069	1.71772	0.157713	1.99515	0.183084	2.03763	0.188432	1.97286	0.18513	2.08049	0.188039	1.80416	0.170688	2.09942	0.187129	2.0491	0.180401	2.30551	0.205211	2.51605	0.212843	2.45799	0.211166
		2.41552	0.212357	2.50767	0.218559			0.755937	0.0926155	1.95431	0.182896	1.94834	0.18133	1.93435	0.183925	2.03787	0.195369	2.08294	0.197072	2.06233	0.195722	1.92377	0.1744	1.93759	0.182728	2.03081	0.190273	1.76363	0.160688	2.00362	0.18386	2.04564	0.189656	1.98194	0.186384	2.09124	0.188582	1.84483	0.170668	2.11254	0.189099	2.0618	0.181601	2.32321	0.207646	2.53109	0.21432	2.46741	0.212327
		2.54135	0.223199	2.68825	0.228232			0.756267	0.0927829	1.95819	0.183849	1.95271	0.182883	1.93783	0.185286	2.0434	0.19667	2.08894	0.198994	2.06526	0.196643	1.92793	0.175332	1.93933	0.183388	2.03332	0.191226	1.81277	0.164266	2.00651	0.184608	2.04836	0.190696	1.98502	0.187144	2.09493	0.189134	1.88837	0.170989	2.11699	0.190765	2.06614	0.182749	2.32922	0.209196	2.53623	0.215717	2.47062	0.213372
		2.47589	0.217144	2.87812	0.237982																							1.86297	0.168289									1.93288	0.171637
		2.50867	0.219358	3.07776	0.247809																							1.91204	0.172584									1.97641	0.172585
		2.63042	0.226886	3.28768	0.257715																							1.95784	0.17696									2.01706	0.173791
		2.20207	0.186966	3.50841	0.267699																							1.99838	0.181228									2.05305	0.175202
		2.86335	0.241959	3.7405	0.277762																							2.03186	0.185202									2.08282	0.176756
		2.69428	0.22707	3.98453	0.287905																							2.05684	0.188706									2.10506	0.178386
		2.73568	0.229935	4.24113	0.298128																							2.07223	0.191588									2.11879	0.180021
		2.70236	0.226992	4.5	0.308015																							2.07734	0.193723									2.12342	0.181588
		2.84478	0.238574	IsoLine	IsoLine
		2.83898	0.237922
		2.73319	0.229
		2.75965	0.231081
		2.82063	0.236114
		2.68804	0.224895
		2.8717	0.240115
		2.84761	0.237847
		2.81754	0.235196
		2.84185	0.23717
		2.74023	0.228689
		2.61167	0.217614
		2.83027	0.235789
		2.81642	0.234597
		2.89944	0.241466
		2.81359	0.234234
		2.84486	0.236748
		2.76916	0.230414
		2.846	0.236521
		2.68244	0.222782
		2.88838	0.23981
		2.86995	0.238008
		2.32006	0.192183
		2.81069	0.232657
		2.86815	0.237332
		2.90293	0.240167
		2.86809	0.237141
		2.8762	0.237723
		2.85308	0.23577
		2.88166	0.238056
		2.90005	0.239488
		2.88419	0.238129
		2.74548	0.226641
		2.92488	0.241375
		2.89701	0.239062
		2.76989	0.228522
		2.76991	0.228461
		2.88616	0.237944
		2.89762	0.238829
		2.84993	0.234772
		2.96478	0.244234
		2.86115	0.235666
		2.87905	0.237028
		2.8272	0.232721
		2.86763	0.235793
		2.93793	0.241515
		2.86986	0.235893
		2.89519	0.237947
		2.64148	0.216957
		2.90333	0.238393
		2.85907	0.234713
		2.91594	0.239225
		2.90217	0.238
		2.89543	0.237123
		2.87256	0.235066
		2.96363	0.242373
		2.91467	0.238326
		2.92807	0.239314
		2.90485	0.23739
		2.76715	0.226093
		2.95745	0.241605
		2.98679	0.243943
		2.88872	0.235817
		2.96062	0.241089
		2.95674	0.240165
		2.97771	0.241712
		2.99747	0.242044
		2.98423	0.240784
		2.99682	0.241727
		2.99439	0.240952
		3.0294	0.243513
		3.07723	0.247212
		IsoLine	IsoLine
[truncated: 164 more columns]

## Sheet: PlotDat5
Source sheet	datatable	700	1.47563e-07	1040	0	700	0
Plot name	ProbDens3	700.55	1.49534e-07	1060	0	1799.45	0
Plot Type	16	701.1	1.5153e-07	1060	3
1st free col	9	701.65	1.53549e-07	1040	3
Sigma Level	1	702.2	1.55593e-07	1040	0
Absolute Errs	TRUE	702.75	1.57662e-07	ErrBox	ErrBox
Symbol Type	1	703.3	1.59755e-07	1060	0
Inverse Plot	FALSE	703.85	1.61874e-07	1080	0
Color Plot	TRUE	704.4	1.64018e-07	1080	2
3D plot	FALSE	704.95	1.66187e-07	1060	2
Linear	FALSE	705.5	1.68382e-07	1060	0
Data Range	R9:S110	706.05	1.70604e-07	ErrBox	ErrBox
Filled Symbols	FALSE	706.6	1.72852e-07	1080	0
ConcAge	FALSE	707.15	1.75126e-07	1100	0
ConcSwap	FALSE	707.7	1.77428e-07	1100	3
1st Symbol-row	1	708.25	1.79756e-07	1080	3
		708.8	1.82113e-07	1080	0
		709.35	1.84497e-07	ErrBox	ErrBox
		709.9	1.86909e-07	1100	0
		710.45	1.8935e-07	1120	0
		711	1.91819e-07	1120	5
		711.55	1.94317e-07	1100	5
		712.1	1.96845e-07	1100	0
		712.65	1.99402e-07	ErrBox	ErrBox
		713.2	2.01988e-07	1120	0
		713.75	2.04605e-07	1140	0
		714.3	2.07253e-07	1140	2
		714.85	2.09931e-07	1120	2
		715.4	2.1264e-07	1120	0
		715.95	2.15381e-07	ErrBox	ErrBox
		716.5	2.18153e-07	1140	0
		717.05	2.20957e-07	1160	0
		717.6	2.23794e-07	1160	2
		718.15	2.26663e-07	1140	2
		718.7	2.29565e-07	1140	0
		719.25	2.32501e-07	ErrBox	ErrBox
		719.8	2.3547e-07	1200	0
		720.35	2.38473e-07	1220	0
		720.9	2.4151e-07	1220	1
		721.45	2.44582e-07	1200	1
		722	2.47689e-07	1200	0
		722.55	2.50831e-07	ErrBox	ErrBox
		723.1	2.54008e-07	1240	0
		723.65	2.57222e-07	1260	0
		724.2	2.60472e-07	1260	4
		724.75	2.63759e-07	1240	4
		725.3	2.67082e-07	1240	0
		725.85	2.70443e-07	ErrBox	ErrBox
		726.4	2.73842e-07	1260	0
		726.95	2.77279e-07	1280	0
		727.5	2.80754e-07	1280	2
		728.05	2.84268e-07	1260	2
		728.6	2.87821e-07	1260	0
		729.15	2.91414e-07	ErrBox	ErrBox
		729.7	2.95047e-07	1280	0
		730.25	2.9872e-07	1300	0
		730.8	3.02433e-07	1300	1
		731.35	3.06188e-07	1280	1
		731.9	3.09984e-07	1280	0
		732.45	3.13822e-07	ErrBox	ErrBox
		733	3.17702e-07	1320	0
		733.55	3.21625e-07	1340	0
		734.1	3.25591e-07	1340	3
		734.65	3.296e-07	1320	3
		735.2	3.33653e-07	1320	0
		735.75	3.3775e-07	ErrBox	ErrBox
		736.3	3.41892e-07	1340	0
		736.85	3.46079e-07	1360	0
		737.4	3.50311e-07	1360	13
		737.95	3.54589e-07	1340	13
		738.5	3.58913e-07	1340	0
		739.05	3.63284e-07	ErrBox	ErrBox
		739.6	3.67702e-07	1360	0
		740.15	3.72168e-07	1380	0
		740.7	3.76682e-07	1380	23
		741.25	3.81243e-07	1360	23
		741.8	3.85854e-07	1360	0
		742.35	3.90514e-07	ErrBox	ErrBox
		742.9	3.95224e-07	1380	0
		743.45	3.99984e-07	1400	0
		744	4.04794e-07	1400	28
		744.55	4.09655e-07	1380	28
		745.1	4.14568e-07	1380	0
		745.65	4.19533e-07	ErrBox	ErrBox
		746.2	4.2455e-07	1400	0
		746.75	4.2962e-07	1420	0
		747.3	4.34743e-07	1420	4
		747.85	4.3992e-07	1400	4
		748.4	4.45151e-07	1400	0
		748.95	4.50437e-07	ErrBox	ErrBox
		749.5	4.55778e-07	1420	0
		750.05	4.61174e-07	1440	0
		750.6	4.66627e-07	1440	6
		751.15	4.72136e-07	1420	6
		751.7	4.77703e-07	1420	0
		752.25	4.83327e-07	ErrBox	ErrBox
		752.8	4.89009e-07
		753.35	4.94749e-07
		753.9	5.00549e-07
		754.45	5.06408e-07
		755	5.12327e-07
		755.55	5.18306e-07
		756.1	5.24347e-07
		756.65	5.30449e-07
		757.2	5.36614e-07
		757.75	5.4284e-07
		758.3	5.4913e-07
		758.85	5.55484e-07
		759.4	5.61902e-07
		759.95	5.68384e-07
		760.5	5.74931e-07
		761.05	5.81545e-07
		761.6	5.88224e-07
		762.15	5.9497e-07
		762.7	6.01784e-07
		763.25	6.08665e-07
		763.8	6.15615e-07
		764.35	6.22634e-07
		764.9	6.29722e-07
		765.45	6.36881e-07
		766	6.4411e-07
		766.55	6.5141e-07
		767.1	6.58782e-07
		767.65	6.66226e-07
		768.2	6.73743e-07
		768.75	6.81334e-07
		769.3	6.88998e-07
		769.85	6.96737e-07
		770.4	7.04552e-07
		770.95	7.12442e-07
		771.5	7.20408e-07
		772.05	7.28451e-07
		772.6	7.36572e-07
		773.15	7.54798e-07
		773.7	7.63441e-07
		774.25	7.72176e-07
		774.8	7.81004e-07
		775.35	7.89926e-07
		775.9	7.98943e-07
		776.45	8.08055e-07
		777	8.17265e-07
		777.55	8.26572e-07
		778.1	8.35979e-07
		778.65	8.45486e-07
		779.2	8.55094e-07
		779.75	8.64805e-07
		780.3	8.7462e-07
		780.85	8.84539e-07
		781.4	8.94564e-07
		781.95	9.04697e-07
		782.5	9.14938e-07
		783.05	9.25289e-07
		783.6	9.3575e-07
		784.15	9.46324e-07
		784.7	9.57011e-07
		785.25	9.67814e-07
		785.8	9.78732e-07
		786.35	9.89768e-07
		786.9	1.00092e-06
		787.45	1.0122e-06
		788	1.0236e-06
		788.55	1.03512e-06
		789.1	1.04676e-06
		789.65	1.06866e-06
		790.2	1.08093e-06
		790.75	1.09334e-06
		791.3	1.10589e-06
		791.85	1.11859e-06
		792.4	1.13144e-06
		792.95	1.14444e-06
		793.5	1.15759e-06
		794.05	1.1709e-06
		794.6	1.18436e-06
		795.15	1.19798e-06
		795.7	1.21176e-06
		796.25	1.22571e-06
		796.8	1.23982e-06
		797.35	1.2541e-06
		797.9	1.26855e-06
		798.45	1.28317e-06
		799	1.29797e-06
		799.55	1.31295e-06
		800.1	1.32811e-06
		800.65	1.34346e-06
		801.2	1.35899e-06
		801.75	1.37471e-06
		802.3	1.40053e-06
		802.85	1.41697e-06
		803.4	1.43361e-06
		803.95	1.45047e-06
		804.5	1.46754e-06
		805.05	1.48483e-06
		805.6	1.50235e-06
		806.15	1.52009e-06
		806.7	1.53806e-06
		807.25	1.55626e-06
		807.8	1.5747e-06
		808.35	1.59338e-06
		808.9	1.61231e-06
		809.45	1.63149e-06
		810	1.65092e-06
		810.55	1.67061e-06
		811.1	1.69057e-06
		811.65	1.71079e-06
		812.2	1.73128e-06
		812.75	1.75204e-06
		813.3	1.77309e-06
		813.85	1.79443e-06
		814.4	1.81605e-06
		814.95	1.83797e-06
		815.5	1.86019e-06
		816.05	1.88272e-06
		816.6	1.90555e-06
		817.15	1.92871e-06
		817.7	1.95218e-06
		818.25	1.97599e-06
		818.8	2.00012e-06
		819.35	2.0246e-06
		819.9	2.04942e-06
		820.45	2.08465e-06
		821	2.11052e-06
		821.55	2.13677e-06
		822.1	2.1634e-06
		822.65	2.19041e-06
		823.2	2.21782e-06
		823.75	2.24564e-06
		824.3	2.27386e-06
		824.85	2.3025e-06
		825.4	2.33157e-06
		825.95	2.36106e-06
		826.5	2.391e-06
		827.05	2.42139e-06
		827.6	2.45223e-06
		828.15	2.48354e-06
		828.7	2.51532e-06
		829.25	2.54758e-06
		829.8	2.58033e-06
		830.35	2.61359e-06
		830.9	2.64735e-06
		831.45	2.68163e-06
		832	2.71644e-06
		832.55	2.75178e-06
		833.1	2.78767e-06
		833.65	2.82412e-06
		834.2	2.86114e-06
		834.75	2.89873e-06
		835.3	2.93692e-06
		835.85	2.9757e-06
		836.4	3.01509e-06
		836.95	3.0551e-06
		837.5	3.09575e-06
		838.05	3.13703e-06
		838.6	3.17898e-06
		839.15	3.22159e-06
		839.7	3.26488e-06
		840.25	3.30887e-06
		840.8	3.35356e-06
		841.35	3.39896e-06
		841.9	3.4451e-06
		842.45	3.49198e-06
		843	3.53962e-06
		843.55	3.58803e-06
		844.1	3.63723e-06
		844.65	3.68722e-06
		845.2	3.73803e-06
		845.75	3.78966e-06
		846.3	3.84214e-06
		846.85	3.89548e-06
		847.4	3.94969e-06
		847.95	4.00479e-06
		848.5	4.06079e-06
		849.05	4.11772e-06
		849.6	4.17558e-06
		850.15	4.2344e-06
		850.7	4.29418e-06
		851.25	4.35496e-06
		851.8	4.41674e-06
		852.35	4.47954e-06
		852.9	4.54339e-06
		853.45	4.60829e-06
		854	4.67428e-06
		854.55	4.74136e-06
		855.1	4.80955e-06
		855.65	4.87888e-06
		856.2	4.94936e-06
		856.75	5.02102e-06
		857.3	5.09388e-06
		857.85	5.16794e-06
		858.4	5.24325e-06
		858.95	5.31981e-06
		859.5	5.39765e-06
		860.05	5.47679e-06
		860.6	5.55725e-06
		861.15	5.63905e-06
		861.7	5.72223e-06
		862.25	5.80679e-06
		862.8	5.89276e-06
		863.35	5.98017e-06
		863.9	6.06904e-06
		864.45	6.1594e-06
		865	6.25126e-06
		865.55	6.34466e-06
		866.1	6.43961e-06
		866.65	6.53615e-06
		867.2	6.63429e-06
		867.75	6.73407e-06
		868.3	6.83551e-06
		868.85	6.93864e-06
		869.4	7.04349e-06
		869.95	7.15008e-06
		870.5	7.25843e-06
		871.05	7.36859e-06
		871.6	7.48056e-06
		872.15	7.5944e-06
		872.7	7.71011e-06
		873.25	7.82774e-06
		873.8	7.94731e-06
		874.35	8.06885e-06
		874.9	8.19239e-06
		875.45	8.31796e-06
		876	8.4456e-06
		876.55	8.57532e-06
		877.1	8.70718e-06
		877.65	8.85136e-06
		878.2	8.98797e-06
		878.75	9.12682e-06
		879.3	9.26793e-06
		879.85	9.41134e-06
		880.4	9.55709e-06
		880.95	9.70521e-06
		881.5	9.85574e-06
		882.05	1.00087e-05
		882.6	1.01641e-05
		883.15	1.03221e-05
		883.7	1.04826e-05
		884.25	1.06457e-05
		884.8	1.08114e-05
		885.35	1.09797e-05
		885.9	1.11507e-05
		886.45	1.13245e-05
		887	1.1501e-05
		887.55	1.16804e-05
		888.1	1.18726e-05
		888.65	1.2058e-05
		889.2	1.22464e-05
		889.75	1.24377e-05
		890.3	1.2632e-05
		890.85	1.28294e-05
		891.4	1.30298e-05
		891.95	1.32334e-05
		892.5	1.34402e-05
		893.05	1.36502e-05
		893.6	1.38634e-05
		894.15	1.40799e-05
		894.7	1.42998e-05
		895.25	1.4523e-05
		895.8	1.47496e-05
		896.35	1.49798e-05
		896.9	1.52134e-05
		897.45	1.54505e-05
		898	1.56913e-05
		898.55	1.59357e-05
		899.1	1.61837e-05
		899.65	1.64355e-05
		900.2	1.6691e-05
		900.75	1.69602e-05
		901.3	1.72241e-05
		901.85	1.74919e-05
		902.4	1.77636e-05
		902.95	1.80394e-05
		903.5	1.83193e-05
		904.05	1.86033e-05
		904.6	1.88915e-05
		905.15	1.91839e-05
		905.7	1.94806e-05
		906.25	1.97816e-05
		906.8	2.00869e-05
		907.35	2.03967e-05
		907.9	2.07109e-05
		908.45	2.10297e-05
		909	2.1353e-05
		909.55	2.1681e-05
		910.1	2.20136e-05
		910.65	2.23509e-05
		911.2	2.2693e-05
		911.75	2.30498e-05
		912.3	2.34022e-05
		912.85	2.37596e-05
		913.4	2.4122e-05
		913.95	2.44894e-05
		914.5	2.4862e-05
		915.05	2.52398e-05
		915.6	2.56228e-05
		916.15	2.6011e-05
		916.7	2.64148e-05
		917.25	2.68144e-05
		917.8	2.72194e-05
		918.35	2.763e-05
		918.9	2.80463e-05
		919.45	2.84681e-05
		920	2.88957e-05
		920.55	2.93291e-05
		921.1	2.97683e-05
		921.65	3.02135e-05
		922.2	3.06646e-05
		922.75	3.11217e-05
		923.3	3.1585e-05
		923.85	3.20544e-05
		924.4	3.253e-05
		924.95	3.3012e-05
		925.5	3.35003e-05
		926.05	3.3995e-05
		926.6	3.44962e-05
		927.15	3.50039e-05
		927.7	3.55183e-05
		928.25	3.60394e-05
		928.8	3.65673e-05
		929.35	3.7102e-05
		929.9	3.76437e-05
		930.45	3.81923e-05
		931	3.8748e-05
		931.55	3.93108e-05
		932.1	3.98808e-05
		932.65	4.04581e-05
		933.2	4.10428e-05
		933.75	4.16349e-05
		934.3	4.22345e-05
		934.85	4.28418e-05
		935.4	4.34567e-05
		935.95	4.40795e-05
		936.5	4.471e-05
		937.05	4.53485e-05
		937.6	4.59951e-05
		938.15	4.66497e-05
		938.7	4.73126e-05
		939.25	4.79837e-05
		939.8	4.86632e-05
		940.35	4.93513e-05
		940.9	5.00479e-05
		941.45	5.07531e-05
		942	5.14672e-05
		942.55	5.21901e-05
		943.1	5.29219e-05
		943.65	5.36629e-05
		944.2	5.4413e-05
		944.75	5.51724e-05
		945.3	5.59412e-05
		945.85	5.67196e-05
		946.4	5.75175e-05
		946.95	5.83156e-05
		947.5	5.91236e-05
		948.05	5.99416e-05
		948.6	6.07697e-05
		949.15	6.1608e-05
		949.7	6.24566e-05
		950.25	6.33157e-05
		950.8	6.41854e-05
		951.35	6.50659e-05
		951.9	6.59572e-05
		952.45	6.68595e-05
		953	6.77729e-05
		953.55	6.86977e-05
		954.1	6.96338e-05
		954.65	7.05815e-05
		955.2	7.15409e-05
		955.75	7.25122e-05
		956.3	7.34954e-05
		956.85	7.44909e-05
		957.4	7.54986e-05
		957.95	7.65188e-05
		958.5	7.75516e-05
		959.05	7.85973e-05
		959.6	7.96559e-05
		960.15	8.07276e-05
		960.7	8.18126e-05
		961.25	8.29111e-05
		961.8	8.40233e-05
		962.35	8.51492e-05
		962.9	8.62892e-05
		963.45	8.74433e-05
		964	8.86118e-05
		964.55	8.97948e-05
		965.1	9.09926e-05
		965.65	9.22054e-05
		966.2	9.34332e-05
		966.75	9.46764e-05
		967.3	9.5935e-05
		967.85	9.72094e-05
		968.4	9.84997e-05
		968.95	9.98061e-05
		969.5	0.000101129
		970.05	0.000102468
		970.6	0.000103824
		971.15	0.000105197
		971.7	0.000106587
		972.25	0.000107994
		972.8	0.00010942
		973.35	0.000110862
		973.9	0.000112323
		974.45	0.000113812
		975	0.000115311
		975.55	0.000116827
		976.1	0.000118363
		976.65	0.000119918
		977.2	0.000121493
		977.75	0.000123087
		978.3	0.000124701
		978.85	0.000126335
		979.4	0.000127989
		979.95	0.000129674
		980.5	0.000131371
		981.05	0.000133088
		981.6	0.000134828
		982.15	0.000136588
		982.7	0.000138371
		983.25	0.000140175
		983.8	0.000142002
		984.35	0.000143851
		984.9	0.000145723
		985.45	0.000147618
		986	0.000149536
		986.55	0.000151478
		987.1	0.000153444
		987.65	0.000155433
		988.2	0.000157447
		988.75	0.000159495
		989.3	0.000161558
		989.85	0.000163646
		990.4	0.000165759
		990.95	0.000167898
		991.5	0.000170072
		992.05	0.000172263
		992.6	0.00017448
		993.15	0.000176723
		993.7	0.000178993
		994.25	0.00018129
		994.8	0.000183614
		995.35	0.000185965
		995.9	0.000188345
		996.45	0.000190752
		997	0.000193188
		997.55	0.000195662
		998.1	0.000198157
		998.65	0.00020068
		999.2	0.000203233
		999.75	0.000205816
		1000.3	0.000208429
		1000.85	0.000211073
		1001.4	0.000213748
		1001.95	0.000216454
		1002.5	0.000219191
		1003.05	0.000221961
		1003.6	0.000224762
		1004.15	0.000227597
		1004.7	0.000230465
		1005.25	0.000233366
		1005.8	0.000236302
		1006.35	0.000239271
		1006.9	0.000242276
		1007.45	0.000245317
		1008	0.000248393
		1008.55	0.000251506
		1009.1	0.000254656
		1009.65	0.000257843
		1010.2	0.00026108
		1010.75	0.000264346
		1011.3	0.000267652
		1011.85	0.000270998
		1012.4	0.000274385
		1012.95	0.000277814
		1013.5	0.000281286
		1014.05	0.000284801
		1014.6	0.00028836
		1015.15	0.000291965
		1015.7	0.000295615
		1016.25	0.000299312
		1016.8	0.000303057
		1017.35	0.00030685
		1017.9	0.000310694
		1018.45	0.000314588
		1019	0.000318534
		1019.55	0.000322533
		1020.1	0.000326586
		1020.65	0.000330694
		1021.2	0.000334858
		1021.75	0.00033908
		1022.3	0.000343371
		1022.85	0.000347713
		1023.4	0.000352117
		1023.95	0.000356584
		1024.5	0.000361114
		1025.05	0.000365711
		1025.6	0.000370374
		1026.15	0.000375105
		1026.7	0.000379906
		1027.25	0.000384778
		1027.8	0.000389723
		1028.35	0.000394742
		1028.9	0.000399836
		1029.45	0.000405008
		1030	0.000410257
		1030.55	0.000415587
		1031.1	0.000420998
		1031.65	0.000426492
		1032.2	0.00043207
		1032.75	0.000437734
		1033.3	0.000443486
		1033.85	0.000449326
		1034.4	0.000455256
		1034.95	0.000461278
		1035.5	0.000467393
		1036.05	0.000473603
		1036.6	0.000479908
		1037.15	0.00048631
		1037.7	0.000492811
		1038.25	0.000499411
		1038.8	0.000506112
		1039.35	0.000512915
		1039.9	0.000519822
		1040.45	0.000526833
		1041	0.00053395
		1041.55	0.000541174
		1042.1	0.000548505
		1042.65	0.000555945
		1043.2	0.000563495
		1043.75	0.000571155
		1044.3	0.000578926
		1044.85	0.00058681
		1045.4	0.000594807
		1045.95	0.000602918
		1046.5	0.000611143
		1047.05	0.000619482
		1047.6	0.000627938
		1048.15	0.000636509
		1048.7	0.000645197
		1049.25	0.000654001
		1049.8	0.000662922
		1050.35	0.00067196
		1050.9	0.000681116
		1051.45	0.000690388
		1052	0.000699778
		1052.55	0.000709285
		1053.1	0.000718908
		1053.65	0.000728648
		1054.2	0.000738503
		1054.75	0.000748474
		1055.3	0.000758559
		1055.85	0.000768768
		1056.4	0.000779081
		1056.95	0.000789506
		1057.5	0.000800041
		1058.05	0.000810684
		1058.6	0.000821435
		1059.15	0.000832291
		1059.7	0.00084325
		1060.25	0.00085431
		1060.8	0.000865469
		1061.35	0.000876723
		1061.9	0.000888069
		1062.45	0.000899505
		1063	0.000911027
		1063.55	0.00092263
		1064.1	0.000934312
		1064.65	0.000946068
		1065.2	0.000957892
		1065.75	0.00096978
		1066.3	0.000981727
		1066.85	0.000993727
		1067.4	0.00100578
		1067.95	0.00101786
		1068.5	0.00102999
		1069.05	0.00104214
		1069.6	0.00105431
		1070.15	0.0010665
		1070.7	0.00107869
		1071.25	0.00109088
		1071.8	0.00110306
		1072.35	0.00111522
		1072.9	0.00112735
		1073.45	0.00113945
		1074	0.0011515
		1074.55	0.0011635
		1075.1	0.00117543
		1075.65	0.0011873
		1076.2	0.00119908
		1076.75	0.00121077
		1077.3	0.00122236
		1077.85	0.00123384
		1078.4	0.00124521
		1078.95	0.00125645
		1079.5	0.00126755
		1080.05	0.00127851
		1080.6	0.00128931
		1081.15	0.00129996
		1081.7	0.00131044
		1082.25	0.00132074
		1082.8	0.00133086
		1083.35	0.00134079
		1083.9	0.00135052
		1084.45	0.00136005
		1085	0.00136938
		1085.55	0.00137849
		1086.1	0.00138738
		1086.65	0.00139606
		1087.2	0.0014045
		1087.75	0.00141272
		1088.3	0.0014207
		1088.85	0.00142844
		1089.4	0.00143595
		1089.95	0.0014432
		1090.5	0.00145021
		1091.05	0.00145698
		1091.6	0.00146348
		1092.15	0.00146974
		1092.7	0.00147573
		1093.25	0.00148145
		1093.8	0.0014869
		1094.35	0.00149208
		1094.9	0.00149698
		1095.45	0.00150159
		1096	0.00150591
		1096.55	0.00150994
		1097.1	0.00151365
		1097.65	0.00151705
		1098.2	0.00152012
		1098.75	0.00152286
		1099.3	0.00152525
		1099.85	0.00152729
		1100.4	0.00152896
		1100.95	0.00153025
		1101.5	0.00153113
		1102.05	0.00153161
		1102.6	0.00153166
		1103.15	0.00153127
		1103.7	0.00153042
		1104.25	0.00152911
		1104.8	0.00152731
		1105.35	0.00152501
		1105.9	0.00152219
		1106.45	0.00151885
		1107	0.00151496
		1107.55	0.00151052
		1108.1	0.00150551
		1108.65	0.00149992
		1109.2	0.00149375
		1109.75	0.00148699
		1110.3	0.00147962
		1110.85	0.00147165
		1111.4	0.00146307
		1111.95	0.00145389
		1112.5	0.00144411
		1113.05	0.00143372
		1113.6	0.00142275
		1114.15	0.00141119
		1114.7	0.00139906
		1115.25	0.00138638
		1115.8	0.00137315
		1116.35	0.0013594
		1116.9	0.00134515
		1117.45	0.00133043
		1118	0.00131525
		1118.55	0.00129965
		1119.1	0.00128365
		1119.65	0.00126729
		1120.2	0.0012506
		1120.75	0.0012336
		1121.3	0.00121635
		1121.85	0.00119886
		1122.4	0.00118118
		1122.95	0.00116335
		1123.5	0.00114539
		1124.05	0.00112735
		1124.6	0.00110927
		1125.15	0.00109117
		1125.7	0.0010731
		1126.25	0.00105509
		1126.8	0.00103717
		1127.35	0.00101938
		1127.9	0.00100174
		1128.45	0.00098428
		1129	0.000967036
		1129.55	0.000950029
		1130.1	0.000933283
		1130.65	0.000916822
		1131.2	0.000900664
		1131.75	0.000884828
		1132.3	0.000869331
		1132.85	0.000854185
		1133.4	0.000839403
		1133.95	0.000824995
		1134.5	0.000810969
		1135.05	0.000797332
		1135.6	0.000784087
		1136.15	0.000771238
		1136.7	0.000758786
		1137.25	0.000746729
		1137.8	0.000735077
		1138.35	0.000723807
		1138.9	0.000712923
		1139.45	0.00070242
		1140	0.000692292
		1140.55	0.00068253
		1141.1	0.000673128
		1141.65	0.000664076
		1142.2	0.000655364
		1142.75	0.000646984
		1143.3	0.000638924
		1143.85	0.000631176
		1144.4	0.000623727
		1144.95	0.000616567
		1145.5	0.000609687
		1146.05	0.000603075
		1146.6	0.00059672
		1147.15	0.000590614
		1147.7	0.000584745
		1148.25	0.000579104
		1148.8	0.000573681
		1149.35	0.000568468
		1149.9	0.000563455
		1150.45	0.000558634
		1151	0.000553997
		1151.55	0.000549547
		1152.1	0.000545257
		1152.65	0.000541129
		1153.2	0.000537156
		1153.75	0.000533334
		1154.3	0.000529656
		1154.85	0.000526116
		1155.4	0.000522711
		1155.95	0.000519434
		1156.5	0.000516303
		1157.05	0.000513273
		1157.6	0.000510361
		1158.15	0.000507572
		1158.7	0.000504884
		1159.25	0.000502304
		1159.8	0.000499828
		1160.35	0.000497454
		1160.9	0.00049518
		1161.45	0.000493003
		1162	0.000490921
		1162.55	0.000488932
		1163.1	0.000487035
		1163.65	0.000485228
		1164.2	0.000483499
		1164.75	0.000481866
		1165.3	0.000480318
		1165.85	0.000478854
		1166.4	0.000477471
		1166.95	0.000476168
		1167.5	0.000474955
		1168.05	0.000473809
		1168.6	0.00047274
		1169.15	0.000471757
		1169.7	0.000470838
		1170.25	0.000469982
		1170.8	0.000469207
		1171.35	0.000468503
		1171.9	0.000467867
		1172.45	0.000467298
		1173	0.000466795
		1173.55	0.000466356
		1174.1	0.000465971
		1174.65	0.000465658
		1175.2	0.000465405
		1175.75	0.00046521
		1176.3	0.000465063
		1176.85	0.000464982
		1177.4	0.000464965
		1177.95	0.000464991
		1178.5	0.000465067
		1179.05	0.000465194
		1179.6	0.000465367
		1180.15	0.000465588
		1180.7	0.000465853
		1181.25	0.000466161
		1181.8	0.000466511
		1182.35	0.0004669
		1182.9	0.000467329
		1183.45	0.000467794
		1184	0.000468294
		1184.55	0.000468829
		1185.1	0.000469405
		1185.65	0.000470003
		1186.2	0.000470631
		1186.75	0.000471286
		1187.3	0.000471968
		1187.85	0.000472685
		1188.4	0.000473416
		1188.95	0.00047417
		1189.5	0.000474945
		1190.05	0.000475741
		1190.6	0.000476555
		1191.15	0.000477388
		1191.7	0.000478238
		1192.25	0.000479103
		1192.8	0.000479984
		1193.35	0.000480891
		1193.9	0.000481802
		1194.45	0.000482738
		1195	0.000483686
		1195.55	0.000484638
		1196.1	0.000485602
		1196.65	0.000486579
		1197.2	0.000487569
		1197.75	0.00048857
		1198.3	0.000489585
		1198.85	0.000490632
		1199.4	0.000491674
		1199.95	0.00049273
		1200.5	0.0004938
		1201.05	0.000494897
		1201.6	0.00049601
		1202.15	0.000497132
		1202.7	0.000498273
		1203.25	0.000499435
		1203.8	0.000500618
		1204.35	0.000501826
		1204.9	0.000503059
		1205.45	0.000504319
		1206	0.00050561
		1206.55	0.000506933
		1207.1	0.000508291
		1207.65	0.000509687
		1208.2	0.000511123
		1208.75	0.000512602
		1209.3	0.000514128
		1209.85	0.000515705
		1210.4	0.000517335
		1210.95	0.000519023
		1211.5	0.000520773
		1212.05	0.000522589
		1212.6	0.000524475
		1213.15	0.000526434
		1213.7	0.000528473
		1214.25	0.000530595
		1214.8	0.000532805
		1215.35	0.00053512
		1215.9	0.000537524
		1216.45	0.000540033
		1217	0.000542662
		1217.55	0.000545397
		1218.1	0.000548255
		1218.65	0.00055124
		1219.2	0.00055435
		1219.75	0.00055761
		1220.3	0.000561016
		1220.85	0.000564576
		1221.4	0.000568294
		1221.95	0.000572179
		1222.5	0.000576235
		1223.05	0.00058047
		1223.6	0.00058489
		1224.15	0.00058951
		1224.7	0.000594319
		1225.25	0.000599332
		1225.8	0.000604554
		1226.35	0.00060999
		1226.9	0.000615647
		1227.45	0.00062153
		1228	0.000627643
		1228.55	0.00063399
		1229.1	0.000640575
		1229.65	0.000647403
		1230.2	0.000654475
		1230.75	0.000661805
		1231.3	0.000669374
		1231.85	0.000677192
		1232.4	0.000685261
		1232.95	0.000693578
		1233.5	0.000702144
		1234.05	0.000710955
		1234.6	0.000720008
		1235.15	0.000729299
		1235.7	0.000738833
		1236.25	0.000748583
		1236.8	0.000758563
		1237.35	0.000768744
		1237.9	0.000779125
		1238.45	0.000789695
		1239	0.000800443
		1239.55	0.000811355
		1240.1	0.000822417
		1240.65	0.000833614
		1241.2	0.000844937
		1241.75	0.000856351
		1242.3	0.000867845
		1242.85	0.000879399
		1243.4	0.000890993
		1243.95	0.000902604
		1244.5	0.00091421
		1245.05	0.000925776
		1245.6	0.0009373
		1246.15	0.000948744
		1246.7	0.000960085
		1247.25	0.000971295
		1247.8	0.00098235
		1248.35	0.000993221
		1248.9	0.00100389
		1249.45	0.00101432
		1250	0.00102449
		1250.55	0.00103437
		1251.1	0.00104394
		1251.65	0.00105317
		1252.2	0.00106204
		1252.75	0.00107054
		1253.3	0.00107862
		1253.85	0.00108627
		1254.4	0.00109349
		1254.95	0.00110023
		1255.5	0.00110649
		1256.05	0.00111225
		1256.6	0.0011175
		1257.15	0.00112223
		1257.7	0.00112642
		1258.25	0.00113007
		1258.8	0.00113318
		1259.35	0.00113574
		1259.9	0.00113776
		1260.45	0.0011392
		1261	0.00114011
		1261.55	0.00114047
		1262.1	0.00114028
		1262.65	0.00113955
		1263.2	0.00113831
		1263.75	0.00113657
		1264.3	0.00113431
		1264.85	0.00113158
		1265.4	0.00112836
		1265.95	0.0011247
		1266.5	0.00112063
		1267.05	0.00111613
		1267.6	0.00111125
		1268.15	0.00110602
		1268.7	0.00110044
		1269.25	0.00109455
		1269.8	0.00108837
		1270.35	0.00108192
		1270.9	0.00107524
		1271.45	0.00106835
		1272	0.00106129
		1272.55	0.00105407
		1273.1	0.00104673
		1273.65	0.00103931
		1274.2	0.00103181
		1274.75	0.00102426
		1275.3	0.00101671
		1275.85	0.00100916
		1276.4	0.00100166
		1276.95	0.000994215
		1277.5	0.000986861
		1278.05	0.000979619
		1278.6	0.000972513
		1279.15	0.000965564
		1279.7	0.000958794
		1280.25	0.000952224
		1280.8	0.000945874
		1281.35	0.000939772
		1281.9	0.000933919
		1282.45	0.000928339
		1283	0.000923061
		1283.55	0.00091808
		1284.1	0.000913421
		1284.65	0.000909097
		1285.2	0.000905131
		1285.75	0.00090152
		1286.3	0.000898282
		1286.85	0.000895429
		1287.4	0.000892973
		1287.95	0.000890922
		1288.5	0.000889298
		1289.05	0.000888091
		1289.6	0.000887329
		1290.15	0.000887003
		1290.7	0.000887129
		1291.25	0.000887716
		1291.8	0.000888773
		1292.35	0.000890307
		1292.9	0.000892326
		1293.45	0.000894839
		1294	0.000897864
		1294.55	0.000901401
		1295.1	0.000905447
		1295.65	0.00091002
		1296.2	0.000915131
		1296.75	0.000920787
		1297.3	0.000926999
		1297.85	0.000933786
		1298.4	0.000941132
		1298.95	0.000949086
		1299.5	0.000957631
		1300.05	0.000966788
		1300.6	0.00097658
		1301.15	0.000987003
		1301.7	0.00099808
		1302.25	0.00100983
		1302.8	0.00102226
		1303.35	0.0010354
		1303.9	0.00104926
		1304.45	0.00106386
		1305	0.00107921
		1305.55	0.00109535
		1306.1	0.0011123
		1306.65	0.00113006
		1307.2	0.00114868
		1307.75	0.00116817
		1308.3	0.00118854
		1308.85	0.00120985
		1309.4	0.00123211
		1309.95	0.00125536
		1310.5	0.00127962
		1311.05	0.00130491
		1311.6	0.00133127
		1312.15	0.00135872
		1312.7	0.0013873
		1313.25	0.00141704
		1313.8	0.00144797
		1314.35	0.00148012
		1314.9	0.00151351
		1315.45	0.00154817
		1316	0.00158413
		1316.55	0.00162143
		1317.1	0.00166008
		1317.65	0.00170011
		1318.2	0.00174152
		1318.75	0.00178435
		1319.3	0.00182861
		1319.85	0.00187432
		1320.4	0.00192148
		1320.95	0.0019701
		1321.5	0.00202019
		1322.05	0.00207174
		1322.6	0.00212476
		1323.15	0.00217923
		1323.7	0.00223514
		1324.25	0.00229247
		1324.8	0.00235121
		1325.35	0.00241135
		1325.9	0.00247283
		1326.45	0.00253566
		1327	0.00259976
		1327.55	0.00266514
		1328.1	0.00273171
		1328.65	0.00279944
		1329.2	0.00286829
		1329.75	0.00293822
		1330.3	0.00300916
		1330.85	0.00308107
		1331.4	0.0031539
		1331.95	0.00322759
		1332.5	0.00330211
		1333.05	0.00337739
		1333.6	0.00345339
		1334.15	0.00353008
		1334.7	0.0036074
		1335.25	0.00368533
		1335.8	0.00376385
		1336.35	0.00384292
		1336.9	0.0039225
		1337.45	0.00400261
		1338	0.00408324
		1338.55	0.00416441
		1339.1	0.00424615
		1339.65	0.00432853
		1340.2	0.00441165
		1340.75	0.00449567
		1341.3	0.00458084
		1341.85	0.00466749
		1342.4	0.00475607
		1342.95	0.00484718
		1343.5	0.0049416
		1344.05	0.00504025
		1344.6	0.00514424
		1345.15	0.00525473
		1345.7	0.00537296
		1346.25	0.00550009
		1346.8	0.00563704
		1347.35	0.00578432
		1347.9	0.00594185
		1348.45	0.0061088
		1349	0.00628346
		1349.55	0.0064632
		1350.1	0.00664446
		1350.65	0.00682302
		1351.2	0.00699419
		1351.75	0.00715319
		1352.3	0.00729557
		1352.85	0.00741763
		1353.4	0.00751683
		1353.95	0.00759197
		1354.5	0.00764337
		1355.05	0.00767282
		1355.6	0.00768337
		1356.15	0.00767905
		1356.7	0.00766445
		1357.25	0.00764427
		1357.8	0.00762299
		1358.35	0.00760452
		1358.9	0.00759201
		1359.45	0.00758771
		1360	0.00759303
		1360.55	0.00760859
		1361.1	0.0076344
		1361.65	0.00767001
		1362.2	0.0077147
		1362.75	0.00776765
		1363.3	0.00782805
		1363.85	0.00789516
		1364.4	0.00796839
		1364.95	0.00804729
		1365.5	0.00813152
		1366.05	0.00822085
		1366.6	0.00831508
		1367.15	0.00841403
		1367.7	0.00851743
		1368.25	0.00862495
		1368.8	0.00873611
		1369.35	0.00885028
		1369.9	0.00896666
		1370.45	0.00908428
		1371	0.009202
		1371.55	0.00931852
		1372.1	0.00943245
		1372.65	0.0095423
		1373.2	0.00964656
		1373.75	0.00974372
		1374.3	0.00983235
		1374.85	0.00991117
		1375.4	0.00997902
		1375.95	0.010035
		1376.5	0.0100784
		1377.05	0.0101089
		1377.6	0.0101263
		1378.15	0.0101307
		1378.7	0.0101225
		1379.25	0.0101022
		1379.8	0.0100707
		1380.35	0.0100289
		1380.9	0.00997766
		1381.45	0.00991814
		1382	0.00985135
		1382.55	0.00977831
		1383.1	0.00969998
		1383.65	0.00961723
		1384.2	0.00953084
		1384.75	0.00944148
		1385.3	0.00934973
		1385.85	0.00925605
		1386.4	0.00916083
		1386.95	0.00906438
		1387.5	0.00896696
		1388.05	0.00886877
		1388.6	0.00876997
		1389.15	0.00867073
		1389.7	0.00857115
		1390.25	0.00847139
		1390.8	0.00837155
		1391.35	0.00827176
		1391.9	0.00817214
		1392.45	0.00807279
		1393	0.00797382
		1393.55	0.00787533
		1394.1	0.00777741
		1394.65	0.00768013
		1395.2	0.00758356
		1395.75	0.00748772
		1396.3	0.00739265
		1396.85	0.00729835
		1397.4	0.00720481
		1397.95	0.00711198
		1398.5	0.00701985
		1399.05	0.00692835
		1399.6	0.00683742
		1400.15	0.00674698
		1400.7	0.00665696
		1401.25	0.00656728
		1401.8	0.00647785
		1402.35	0.00638863
		1402.9	0.00629951
		1403.45	0.00621044
		1404	0.00612135
		1404.55	0.00603219
		1405.1	0.00594292
		1405.65	0.0058535
		1406.2	0.00576391
		1406.75	0.00567414
		1407.3	0.00558418
		1407.85	0.00549404
		1408.4	0.00540373
		1408.95	0.00531327
		1409.5	0.00522269
		1410.05	0.00513205
		1410.6	0.00504138
		1411.15	0.00495073
		1411.7	0.00486016
		1412.25	0.00476974
		1412.8	0.00467952
		1413.35	0.00458957
		1413.9	0.00449996
		1414.45	0.00441076
		1415	0.00432204
		1415.55	0.00423386
		1416.1	0.00414631
		1416.65	0.00405944
		1417.2	0.00397333
		1417.75	0.00388803
		1418.3	0.00380358
		1418.85	0.00372009
		1419.4	0.00363759
		1419.95	0.00355612
		1420.5	0.00347575
		1421.05	0.00339651
		1421.6	0.00331844
		1422.15	0.00324158
		1422.7	0.00316596
		1423.25	0.00309161
		1423.8	0.00301856
		1424.35	0.00294683
		1424.9	0.00287643
		1425.45	0.00280739
		1426	0.0027397
		1426.55	0.0026734
		1427.1	0.00260847
		1427.65	0.00254492
		1428.2	0.00248275
		1428.75	0.00242196
		1429.3	0.00236255
		1429.85	0.00230449
		1430.4	0.00224779
		1430.95	0.00219243
		1431.5	0.00213839
		1432.05	0.00208568
		1432.6	0.00203424
		1433.15	0.00198408
		1433.7	0.0019352
		1434.25	0.00188754
		1434.8	0.00184111
		1435.35	0.00179587
		1435.9	0.00175179
		1436.45	0.00170886
		1437	0.00166705
		1437.55	0.00162633
		1438.1	0.00158668
		1438.65	0.00154808
		1439.2	0.0015105
		1439.75	0.00147392
		1440.3	0.00143831
		1440.85	0.00140364
		1441.4	0.00136989
		1441.95	0.00133704
		1442.5	0.00130507
		1443.05	0.00127394
		1443.6	0.00124363
		1444.15	0.00121413
		1444.7	0.00118541
		1445.25	0.00115745
		1445.8	0.00113023
		1446.35	0.00110372
		1446.9	0.00107792
		1447.45	0.00105279
		1448	0.00102831
		1448.55	0.00100449
		1449.1	0.000981275
		1449.65	0.000958678
		1450.2	0.00093667
		1450.75	0.000915216
		1451.3	0.00089434
		1451.85	0.000874005
		1452.4	0.000854185
		1452.95	0.000834888
		1453.5	0.000816089
		1454.05	0.000797774
		1454.6	0.000779929
		1455.15	0.000762543
		1455.7	0.000745604
		1456.25	0.000729098
		1456.8	0.000713014
		1457.35	0.000697342
		1457.9	0.000682069
		1458.45	0.000667177
		1459	0.000652673
		1459.55	0.000638538
		1460.1	0.000624753
		1460.65	0.000611327
		1461.2	0.00059824
		1461.75	0.000585484
		1462.3	0.00057304
		1462.85	0.000560919
		1463.4	0.000549084
		1463.95	0.000537565
		1464.5	0.000526334
		1465.05	0.000515373
		1465.6	0.000504695
		1466.15	0.000494282
		1466.7	0.000484127
		1467.25	0.000474222
		1467.8	0.00046456
		1468.35	0.000455127
		1468.9	0.000445925
		1469.45	0.000436939
		1470	0.000428183
		1470.55	0.00041964
		1471.1	0.000411313
		1471.65	0.000403186
		1472.2	0.000395244
		1472.75	0.000387492
		1473.3	0.000379935
		1473.85	0.000372557
		1474.4	0.000365352
		1474.95	0.000358318
		1475.5	0.000351448
		1476.05	0.00034473
		1476.6	0.000338178
		1477.15	0.000331768
		1477.7	0.000325507
		1478.25	0.0003194
		1478.8	0.000313433
		1479.35	0.000307602
		1479.9	0.000301902
		1480.45	0.000296332
		1481	0.000290886
		1481.55	0.000285563
		1482.1	0.000280358
		1482.65	0.00027526
		1483.2	0.000270285
		1483.75	0.00026542
		1484.3	0.000260652
		1484.85	0.000255998
		1485.4	0.000251437
		1485.95	0.000246976
		1486.5	0.00024262
		1487.05	0.000238358
		1487.6	0.000234187
		1488.15	0.000230104
		1488.7	0.000226109
		1489.25	0.000222198
		1489.8	0.000218359
		1490.35	0.000214612
		1490.9	0.000210933
		1491.45	0.00020734
		1492	0.000203823
		1492.55	0.000200368
		1493.1	0.000196994
		1493.65	0.000193689
		1494.2	0.000190452
		1494.75	0.00018728
		1495.3	0.000184172
		1495.85	0.000181117
		1496.4	0.000178134
		1496.95	0.00017521
		1497.5	0.000172344
		1498.05	0.000169515
		1498.6	0.000166762
		1499.15	0.000164064
		1499.7	0.000161417
		1500.25	0.000158822
		1500.8	0.000156277
		1501.35	0.000153782
		1501.9	0.000151324
		1502.45	0.000148924
		1503	0.000146569
		1503.55	0.000144259
		1504.1	0.000141992
		1504.65	0.000139768
		1505.2	0.000137585
		1505.75	0.000135443
		1506.3	0.00013334
		1506.85	0.000131276
		1507.4	0.000129249
		1507.95	0.00012725
		1508.5	0.000125297
		1509.05	0.00012337
		1509.6	0.000121488
		1510.15	0.000119639
		1510.7	0.000117823
		1511.25	0.000116039
		1511.8	0.000114287
		1512.35	0.000112555
		1512.9	0.000110864
		1513.45	0.000109203
		1514	0.00010757
		1514.55	0.000105956
		1515.1	0.000104379
		1515.65	0.000102829
		1516.2	0.000101306
		1516.75	9.98081e-05
		1517.3	9.83355e-05
		1517.85	9.6878e-05
		1518.4	9.5455e-05
		1518.95	9.40556e-05
		1519.5	9.26792e-05
		1520.05	9.13255e-05
		1520.6	8.99846e-05
		1521.15	8.86756e-05
		1521.7	8.73879e-05
		1522.25	8.61209e-05
		1522.8	8.48742e-05
		1523.35	8.36474e-05
		1523.9	8.24402e-05
		1524.45	8.12521e-05
		1525	8.00829e-05
		1525.55	7.89321e-05
		1526.1	7.77895e-05
		1526.65	7.66751e-05
		1527.2	7.55781e-05
		1527.75	7.44981e-05
		1528.3	7.34348e-05
		1528.85	7.2388e-05
		1529.4	7.13573e-05
		1529.95	7.03424e-05
		1530.5	6.9343e-05
		1531.05	6.83497e-05
		1531.6	6.73811e-05
		1532.15	6.64273e-05
		1532.7	6.54878e-05
		1533.25	6.45626e-05
		1533.8	6.36512e-05
		1534.35	6.2735e-05
		1534.9	6.1852e-05
		1535.45	6.09822e-05
		1536	6.01252e-05
		1536.55	5.9281e-05
		1537.1	5.84492e-05
		1537.65	5.76297e-05
		1538.2	5.68127e-05
		1538.75	5.60178e-05
		1539.3	5.52254e-05
		1539.85	5.44542e-05
		1540.4	5.36942e-05
		1540.95	5.29453e-05
		1541.5	5.22073e-05
		1542.05	5.148e-05
		1542.6	5.07633e-05
		1543.15	5.0057e-05
		1543.7	4.93609e-05
		1544.25	4.86749e-05
		1544.8	4.79988e-05
		1545.35	4.73325e-05
		1545.9	4.66758e-05
		1546.45	4.60096e-05
		1547	4.53727e-05
		1547.55	4.47449e-05
		1548.1	4.41262e-05
		1548.65	4.35163e-05
		1549.2	4.29152e-05
		1549.75	4.23226e-05
		1550.3	4.17386e-05
		1550.85	4.11629e-05
		1551.4	4.05955e-05
		1551.95	4.00362e-05
		1552.5	3.94849e-05
		1553.05	3.89415e-05
		1553.6	3.84058e-05
		1554.15	3.78778e-05
		1554.7	3.73574e-05
		1555.25	3.68444e-05
		1555.8	3.63387e-05
		1556.35	3.58307e-05
		1556.9	3.53302e-05
		1557.45	3.48472e-05
		1558	3.4371e-05
		1558.55	3.39016e-05
		1559.1	3.34388e-05
		1559.65	3.29825e-05
		1560.2	3.25327e-05
		1560.75	3.20893e-05
		1561.3	3.16522e-05
		1561.85	3.12212e-05
		1562.4	3.07964e-05
		1562.95	3.03776e-05
		1563.5	2.99647e-05
		1564.05	2.95577e-05
		1564.6	2.91565e-05
		1565.15	2.87609e-05
		1565.7	2.8371e-05
		1566.25	2.79866e-05
		1566.8	2.76077e-05
		1567.35	2.72341e-05
		1567.9	2.68659e-05
		1568.45	2.65029e-05
		1569	2.61357e-05
		1569.55	2.57834e-05
		1570.1	2.54361e-05
		1570.65	2.50938e-05
		1571.2	2.47562e-05
		1571.75	2.44235e-05
		1572.3	2.40955e-05
		1572.85	2.37627e-05
		1573.4	2.34444e-05
		1573.95	2.31306e-05
		1574.5	2.28212e-05
		1575.05	2.25162e-05
		1575.6	2.22155e-05
		1576.15	2.1919e-05
		1576.7	2.16267e-05
		1577.25	2.13386e-05
		1577.8	2.10545e-05
		1578.35	2.07744e-05
		1578.9	2.04982e-05
		1579.45	2.0226e-05
		1580	1.99576e-05
		1580.55	1.9693e-05
		1581.1	1.94321e-05
		1581.65	1.91748e-05
		1582.2	1.89213e-05
		1582.75	1.86712e-05
		1583.3	1.84247e-05
		1583.85	1.81817e-05
		1584.4	1.79421e-05
		1584.95	1.77058e-05
		1585.5	1.74729e-05
		1586.05	1.72432e-05
		1586.6	1.70168e-05
		1587.15	1.67936e-05
		1587.7	1.65734e-05
		1588.25	1.63564e-05
		1588.8	1.61424e-05
		1589.35	1.59314e-05
		1589.9	1.57233e-05
		1590.45	1.55182e-05
		1591	1.53159e-05
		1591.55	1.51164e-05
		1592.1	1.49198e-05
		1592.65	1.47258e-05
		1593.2	1.45248e-05
		1593.75	1.43367e-05
		1594.3	1.41512e-05
		1594.85	1.39682e-05
		1595.4	1.37878e-05
		1595.95	1.36098e-05
		1596.5	1.34343e-05
		1597.05	1.32612e-05
		1597.6	1.30808e-05
		1598.15	1.29129e-05
		1598.7	1.27473e-05
		1599.25	1.2584e-05
		1599.8	1.24229e-05
		1600.35	1.22639e-05
		1600.9	1.20975e-05
		1601.45	1.19433e-05
		1602	1.17913e-05
		1602.55	1.16412e-05
		1603.1	1.14932e-05
		1603.65	1.13471e-05
		1604.2	1.12031e-05
		1604.75	1.10609e-05
		1605.3	1.09207e-05
		1605.85	1.07823e-05
		1606.4	1.06458e-05
		1606.95	1.05111e-05
		1607.5	1.03782e-05
		1608.05	1.02471e-05
		1608.6	1.01177e-05
		1609.15	9.99003e-06
		1609.7	9.86406e-06
		1610.25	9.73977e-06
		1610.8	9.61712e-06
		1611.35	9.4961e-06
		1611.9	9.37667e-06
		1612.45	9.24915e-06
		1613	9.13329e-06
		1613.55	9.01895e-06
		1614.1	8.90609e-06
		1614.65	8.79471e-06
		1615.2	8.68477e-06
		1615.75	8.57626e-06
		1616.3	8.46916e-06
		1616.85	8.36344e-06
		1617.4	8.2591e-06
		1617.95	8.1561e-06
		1618.5	8.05444e-06
		1619.05	7.95408e-06
		1619.6	7.85502e-06
		1620.15	7.75723e-06
		1620.7	7.66069e-06
		1621.25	7.56539e-06
		1621.8	7.47132e-06
		1622.35	7.37844e-06
		1622.9	7.28676e-06
		1623.45	7.19624e-06
		1624	7.10687e-06
		1624.55	7.01864e-06
		1625.1	6.93154e-06
		1625.65	6.84553e-06
		1626.2	6.76062e-06
		1626.75	6.67677e-06
		1627.3	6.59399e-06
		1627.85	6.51225e-06
		1628.4	6.43154e-06
		1628.95	6.35184e-06
		1629.5	6.27315e-06
		1630.05	6.19544e-06
		1630.6	6.1187e-06
		1631.15	6.04292e-06
		1631.7	5.96809e-06
		1632.25	5.89419e-06
		1632.8	5.82121e-06
		1633.35	5.74913e-06
		1633.9	5.67795e-06
		1634.45	5.60765e-06
		1635	5.53823e-06
		1635.55	5.46966e-06
		1636.1	5.40193e-06
		1636.65	5.33504e-06
		1637.2	5.26897e-06
		1637.75	5.20372e-06
		1638.3	5.13926e-06
		1638.85	5.0756e-06
		1639.4	5.01271e-06
		1639.95	4.95059e-06
		1640.5	4.88923e-06
		1641.05	4.82862e-06
		1641.6	4.76875e-06
		1642.15	4.7096e-06
		1642.7	4.65118e-06
		1643.25	4.59346e-06
		1643.8	4.53644e-06
		1644.35	4.48011e-06
		1644.9	4.42446e-06
		1645.45	4.36948e-06
		1646	4.31517e-06
		1646.55	4.26151e-06
		1647.1	4.20849e-06
		1647.65	4.15611e-06
		1648.2	4.10437e-06
		1648.75	4.05324e-06
		1649.3	4.00272e-06
		1649.85	3.95281e-06
		1650.4	3.9035e-06
		1650.95	3.85477e-06
		1651.5	3.80663e-06
		1652.05	3.75906e-06
		1652.6	3.71206e-06
		1653.15	3.66562e-06
		1653.7	3.61973e-06
		1654.25	3.57439e-06
		1654.8	3.52958e-06
		1655.35	3.48531e-06
		1655.9	3.44156e-06
		1656.45	3.39833e-06
		1657	3.35562e-06
		1657.55	3.31341e-06
		1658.1	3.2717e-06
		1658.65	3.23048e-06
		1659.2	3.18975e-06
		1659.75	3.1495e-06
		1660.3	3.10972e-06
		1660.85	3.07042e-06
		1661.4	3.03158e-06
		1661.95	2.9932e-06
		1662.5	2.95527e-06
		1663.05	2.91779e-06
		1663.6	2.88075e-06
		1664.15	2.84414e-06
		1664.7	2.80797e-06
		1665.25	2.77222e-06
		1665.8	2.7369e-06
		1666.35	2.70199e-06
		1666.9	2.65792e-06
		1667.45	2.62421e-06
		1668	2.59089e-06
		1668.55	2.55796e-06
		1669.1	2.5254e-06
		1669.65	2.49322e-06
		1670.2	2.46141e-06
		1670.75	2.42996e-06
		1671.3	2.39888e-06
		1671.85	2.36815e-06
		1672.4	2.33778e-06
		1672.95	2.30776e-06
		1673.5	2.26855e-06
		1674.05	2.23954e-06
		1674.6	2.21085e-06
		1675.15	2.18249e-06
		1675.7	2.15446e-06
		1676.25	2.11709e-06
		1676.8	2.08985e-06
		1677.35	2.06291e-06
		1677.9	2.03629e-06
		1678.45	2.00997e-06
		1679	1.98395e-06
		1679.55	1.95823e-06
		1680.1	1.9328e-06
		1680.65	1.90766e-06
		1681.2	1.88282e-06
		1681.75	1.85826e-06
		1682.3	1.83398e-06
		1682.85	1.80999e-06
		1683.4	1.78627e-06
		1683.95	1.76282e-06
		1684.5	1.73965e-06
		1685.05	1.71675e-06
		1685.6	1.69411e-06
		1686.15	1.67174e-06
		1686.7	1.64963e-06
		1687.25	1.62777e-06
		1687.8	1.60617e-06
		1688.35	1.58483e-06
		1688.9	1.56374e-06
		1689.45	1.54289e-06
		1690	1.52229e-06
		1690.55	1.50193e-06
		1691.1	1.48181e-06
		1691.65	1.46193e-06
		1692.2	1.44229e-06
		1692.75	1.42287e-06
		1693.3	1.40369e-06
		1693.85	1.38474e-06
		1694.4	1.36601e-06
		1694.95	1.34751e-06
		1695.5	1.32923e-06
		1696.05	1.31116e-06
		1696.6	1.29332e-06
		1697.15	1.27568e-06
		1697.7	1.25826e-06
		1698.25	1.24105e-06
		1698.8	1.22405e-06
		1699.35	1.20725e-06
		1699.9	1.19066e-06
		1700.45	1.17427e-06
		1701	1.15808e-06
		1701.55	1.14208e-06
		1702.1	1.12628e-06
		1702.65	1.11067e-06
		1703.2	1.09526e-06
		1703.75	1.08003e-06
		1704.3	1.06499e-06
		1704.85	1.05014e-06
		1705.4	1.02576e-06
		1705.95	1.0116e-06
		1706.5	9.97605e-07
		1707.05	9.8378e-07
		1707.6	9.70121e-07
		1708.15	9.56625e-07
		1708.7	9.43292e-07
		1709.25	9.3012e-07
		1709.8	9.17107e-07
		1710.35	9.04252e-07
		1710.9	8.91552e-07
		1711.45	8.79008e-07
		1712	8.66617e-07
		1712.55	8.54377e-07
		1713.1	8.42288e-07
		1713.65	8.30347e-07
		1714.2	8.18554e-07
		1714.75	8.06906e-07
		1715.3	7.95403e-07
		1715.85	7.84042e-07
		1716.4	7.72823e-07
		1716.95	7.61745e-07
		1717.5	7.50804e-07
		1718.05	7.40001e-07
		1718.6	7.29334e-07
		1719.15	7.18801e-07
		1719.7	7.08401e-07
		1720.25	6.98133e-07
		1720.8	6.87995e-07
		1721.35	6.77986e-07
		1721.9	6.68105e-07
		1722.45	6.5835e-07
		1723	6.4872e-07
		1723.55	6.39214e-07
		1724.1	6.2983e-07
		1724.65	6.20567e-07
		1725.2	6.11424e-07
		1725.75	6.02399e-07
		1726.3	5.93492e-07
		1726.85	5.847e-07
		1727.4	5.76023e-07
		1727.95	5.6746e-07
		1728.5	5.59009e-07
		1729.05	5.50669e-07
		1729.6	5.42439e-07
		1730.15	5.34318e-07
		1730.7	5.26304e-07
		1731.25	5.18396e-07
		1731.8	5.10593e-07
		1732.35	5.02894e-07
		1732.9	4.95298e-07
		1733.45	4.87804e-07
		1734	4.8041e-07
		1734.55	4.73115e-07
		1735.1	4.65918e-07
		1735.65	4.58819e-07
		1736.2	4.51816e-07
		1736.75	4.44907e-07
		1737.3	4.38093e-07
		1737.85	4.31371e-07
		1738.4	4.24741e-07
		1738.95	4.18201e-07
		1739.5	4.11752e-07
		1740.05	4.0539e-07
		1740.6	3.99117e-07
		1741.15	3.92929e-07
		1741.7	3.86828e-07
		1742.25	3.8081e-07
		1742.8	3.74877e-07
		1743.35	3.69025e-07
		1743.9	3.63256e-07
		1744.45	3.57567e-07
		1745	3.51957e-07
		1745.55	3.46427e-07
		1746.1	3.40974e-07
		1746.65	3.35597e-07
		1747.2	3.30297e-07
		1747.75	3.25072e-07
		1748.3	3.1992e-07
		1748.85	3.14842e-07
		1749.4	3.09836e-07
		1749.95	3.04902e-07
		1750.5	3.00038e-07
		1751.05	2.95243e-07
		1751.6	2.90518e-07
		1752.15	2.8586e-07
		1752.7	2.8127e-07
		1753.25	2.76745e-07
		1753.8	2.72287e-07
		1754.35	2.67892e-07
		1754.9	2.63562e-07
		1755.45	2.59295e-07
		1756	2.55089e-07
		1756.55	2.50946e-07
		1757.1	2.46863e-07
		1757.65	2.4284e-07
		1758.2	2.38876e-07
		1758.75	2.3497e-07
		1759.3	2.31122e-07
		1759.85	2.27331e-07
		1760.4	2.23596e-07
		1760.95	2.19917e-07
		1761.5	2.16292e-07
		1762.05	2.12721e-07
		1762.6	2.09204e-07
		1763.15	2.05739e-07
		1763.7	2.02326e-07
		1764.25	1.98965e-07
		1764.8	1.95654e-07
		1765.35	1.92393e-07
		1765.9	1.89181e-07
		1766.45	1.86018e-07
		1767	1.82902e-07
		1767.55	1.79834e-07
		1768.1	1.76813e-07
		1768.65	1.73838e-07
		1769.2	1.70908e-07
		1769.75	1.68024e-07
		1770.3	1.65183e-07
		1770.85	1.62386e-07
		1771.4	1.59632e-07
		1771.95	1.56921e-07
		1772.5	1.54251e-07
		1773.05	1.51623e-07
		1773.6	1.49036e-07
		1774.15	1.46489e-07
		1774.7	1.43981e-07
		1775.25	1.41513e-07
		1775.8	1.39083e-07
		1776.35	1.36691e-07
		1776.9	1.34337e-07
		1777.45	1.3202e-07
		1778	1.29739e-07
		1778.55	1.27494e-07
		1779.1	1.25285e-07
		1779.65	1.2311e-07
		1780.2	1.2097e-07
		1780.75	1.18864e-07
		1781.3	1.16792e-07
		1781.85	1.14753e-07
		1782.4	1.12746e-07
		1782.95	1.10771e-07
		1783.5	1.08828e-07
		1784.05	1.06916e-07
		1784.6	1.05035e-07
		1785.15	1.03185e-07
		1785.7	1.01364e-07
		1786.25	9.95725e-08
		1786.8	9.78101e-08
		1787.35	9.60763e-08
		1787.9	9.43708e-08
		1788.45	9.2693e-08
		1789	9.10426e-08
		1789.55	8.94192e-08
		1790.1	8.78223e-08
		1790.65	8.62517e-08
		1791.2	8.47068e-08
		1791.75	8.31874e-08
		1792.3	8.16931e-08
		1792.85	8.02234e-08
		1793.4	7.87781e-08
		1793.95	7.73567e-08
		1794.5	7.59589e-08
		1795.05	7.45843e-08
		1795.6	7.32327e-08
		1796.15	7.19036e-08
		1796.7	7.05968e-08
		1797.25	6.93118e-08
		1797.8	6.80484e-08
		1798.35	6.68062e-08
		1798.9	6.55849e-08
		1799.45	6.43842e-08
[truncated: 1 more rows]

## Sheet: Datatable
DR Table 1. U-Pb geochronological analyses by Laser-Ablation Multicollector ICP Mass Spectrometery
							Isotope ratios						Apparent ages (Ma)
Analysis	U	206Pb	U/Th	206Pb*	±	207Pb*	±	206Pb*	±	error	206Pb*	±	207Pb*	±	206Pb*	±	Best age	±	Conc
	(ppm)	204Pb		207Pb*	(%)	235U*	(%)	238U	(%)	corr.	238U*	(Ma)	235U	(Ma)	207Pb*	(Ma)	(Ma)	(Ma)	(%)
Lower Hickory sandstone, sample 1 (Late Middle Cambrian)
LOWER HICKORY-8 <>	24.6332	8966.4	1.0961	13.5201	3.1709	1.8621	3.40599	0.182592	1.24345	0.365077	1081.12	12.3764	1067.73	22.5042	1040.47	64.0297	1040.47	64.0297	103.907
LOWER HICKORY-47 <>	59.1998	41738.2	1.81523	13.4102	3.18076	1.84374	3.9011	0.179322	2.25861	0.578968	1063.27	22.1393	1061.2	25.6873	1056.95	64.0647	1056.95	64.0647	100.598
LOWER HICKORY-58 <>	75.2341	28609.3	0.774378	13.3909	1.8335	1.8502	3.1262	0.179691	2.53208	0.809954	1065.29	24.8632	1063.5	20.6087	1059.86	36.9192	1059.86	36.9192	100.512
LOWER HICKORY-96 <>	98.8157	40010.7	2.37886	13.3121	1.03346	1.90524	4.78658	0.183947	4.67369	0.976414	1088.5	46.8109	1082.92	31.8835	1071.73	20.7442	1071.73	20.7442	101.565
LOWER HICKORY-52 <>	77.0614	80561.4	2.47192	13.2687	1.9308	1.93782	5.14761	0.186483	4.77179	0.92699	1102.3	48.3488	1094.25	34.4898	1078.28	38.7729	1078.28	38.7729	102.227
LOWER HICKORY-83 <>	145.113	82188.5	2.33373	13.191	0.895282	1.99155	2.44281	0.190532	2.27284	0.930419	1124.26	23.4485	1112.65	16.5141	1090.04	17.9183	1090.04	17.9183	103.139
LOWER HICKORY-109 <>	45.0187	61813.4	1.25798	13.1623	3.51022	1.82478	3.73143	0.174197	1.26569	0.339197	1035.2	12.1045	1054.4	24.4802	1094.41	70.3006	1094.41	70.3006	94.5892
LOWER HICKORY-14 <>	155.076	49316.9	1.99662	13.1316	0.857287	1.89557	1.52394	0.180533	1.25994	0.826766	1069.89	12.4208	1079.54	10.1302	1099.06	17.1649	1099.06	17.1649	97.3458
LOWER HICKORY-11 <>	91.9499	73961	1.26724	13.0996	1.20947	1.97021	2.11427	0.187184	1.73417	0.820218	1106.1	17.6263	1105.38	14.2411	1103.96	24.2007	1103.96	24.2007	100.194
LOWER HICKORY-88 <>	189.264	5151.02	1.12617	13.0942	3.41843	1.83721	8.62731	0.174476	7.92116	0.91815	1036.72	75.861	1058.86	56.7839	1104.78	68.3749	1104.78	68.3749	93.8402
LOWER HICKORY-26 <>	87.7474	12029.6	2.21626	13.0777	2.24127	1.9348	2.44633	0.183514	0.98044	0.400779	1086.14	9.8002	1093.2	16.3773	1107.28	44.7747	1107.28	44.7747	98.0914
LOWER HICKORY-31 <>	197.344	42751	1.70027	13.0475	1.58679	1.9802	2.272	0.187385	1.62606	0.715698	1107.2	16.5425	1108.79	15.3297	1111.9	31.689	1111.9	31.689	99.5771
LOWER HICKORY-61 <>	130.573	32346.4	2.23337	13.0291	0.652027	1.90793	2.66675	0.180292	2.58581	0.969649	1068.57	25.4626	1083.86	17.7678	1114.71	12.9965	1114.71	12.9965	95.8604
LOWER HICKORY-125 <>	45.9918	23683.6	1.13792	12.9829	2.91918	2.00392	2.99755	0.188691	0.680945	0.227167	1114.28	6.96808	1116.84	20.307	1121.83	58.2209	1121.83	58.2209	99.3274
LOWER HICKORY-119 <>	19.9231	10158.4	0.764746	12.8811	6.75838	1.91052	7.35566	0.178485	2.90345	0.394723	1058.69	28.3474	1084.76	49.0648	1137.52	134.601	1137.52	134.601	93.0706
LOWER HICKORY-56 <>	61.1998	15408.3	1.20134	12.743	2.531	2.00547	3.67042	0.185347	2.6582	0.724222	1096.12	26.7947	1117.36	24.8735	1158.89	50.2076	1158.89	50.2076	94.5836
LOWER HICKORY-93 <>	54.7081	3481.97	1.9965	12.7389	3.28187	1.9586	3.62445	0.180958	1.53816	0.424385	1072.2	15.1937	1101.4	24.3677	1159.52	65.0777	1159.52	65.0777	92.4693
LOWER HICKORY-37 <>	47.2595	47689.3	1.61083	12.4494	1.30849	2.17884	4.55551	0.196731	4.36355	0.957861	1157.74	46.2425	1174.31	31.7151	1204.97	25.7778	1204.97	25.7778	96.0802
LOWER HICKORY-35 <>	61.2084	30794.9	1.21861	12.2106	3.10052	2.40878	3.49271	0.213321	1.60804	0.4604	1246.49	18.2253	1245.22	25.0656	1243.01	60.7405	1243.01	60.7405	100.28
LOWER HICKORY-86 <>	85.4808	52001	1.29301	12.1638	1.78027	2.39071	2.20628	0.210908	1.3032	0.590675	1233.65	14.6322	1239.82	15.7966	1250.54	34.8262	1250.54	34.8262	98.6499
LOWER HICKORY-67 <>	119.526	66264.8	1.5515	12.1215	1.40382	2.41552	1.98397	0.212357	1.40194	0.706633	1241.36	15.8301	1247.23	14.2478	1257.38	27.4305	1257.38	27.4305	98.7258
LOWER HICKORY-74 <>	97.4465	90670.9	2.07263	12.1096	0.750127	2.54135	2.18644	0.223199	2.05373	0.939305	1298.76	24.1579	1283.96	15.933	1259.3	14.6808	1259.3	14.6808	103.133
LOWER HICKORY-57 <>	111.434	59262.1	1.30238	12.0925	1.07698	2.47589	2.90526	0.217144	2.69826	0.928753	1266.76	31.0321	1265.01	21.0156	1262.02	21.0382	1262.02	21.0382	100.376
LOWER HICKORY-39 <>	102.659	65820.4	2.85267	12.0562	1.30205	2.50867	2.83977	0.219358	2.52368	0.888692	1278.48	29.267	1274.55	20.6193	1267.93	25.4094	1267.93	25.4094	100.832
LOWER HICKORY-11 <>	44.3761	48331.6	1.18267	11.8928	2.01659	2.63042	3.46267	0.226886	2.81486	0.812917	1318.16	33.557	1309.18	25.4801	1294.49	39.2056	1294.49	39.2056	101.829
LOWER HICKORY-68 <>	90.3184	11030.2	2.47102	11.7066	1.10354	2.20207	1.55914	0.186966	1.10141	0.706421	1104.92	11.1838	1181.7	10.8876	1325.11	21.372	1325.11	21.372	83.3828
LOWER HICKORY-18 <>	54.6697	48204.8	1.31411	11.6511	2.14846	2.86335	3.02938	0.241959	2.13571	0.704999	1396.87	26.8224	1372.33	22.8017	1334.31	41.5565	1334.31	41.5565	104.689
LOWER HICKORY-44 <>	194.593	73670.5	1.45242	11.6203	0.615538	2.69428	1.68833	0.22707	1.57212	0.93117	1319.12	18.7541	1326.89	12.5032	1339.42	11.897	1339.42	11.897	98.4845
LOWER HICKORY-20 <>	141.713	27011.8	1.70329	11.5888	1.51776	2.73568	2.79906	0.229935	2.35184	0.840224	1334.16	28.3433	1338.2	20.8161	1344.67	29.3139	1344.67	29.3139	99.2183
LOWER HICKORY-33 <>	95.5223	24394.5	1.50001	11.5816	0.833207	2.70236	1.54278	0.226992	1.29843	0.84162	1318.71	15.4848	1329.11	11.4345	1345.88	16.0877	1345.88	16.0877	97.9816
LOWER HICKORY-16 <>	60.092	35178.6	1.77885	11.5631	1.02869	2.84478	1.74443	0.238574	1.40884	0.807623	1379.28	17.4938	1367.43	13.1064	1348.96	19.855	1348.96	19.855	102.248
LOWER HICKORY-50 <>	142.256	83168.6	1.87767	11.5551	0.774515	2.83898	0.909281	0.237922	0.476361	0.523887	1375.88	5.90195	1365.9	6.82781	1350.3	14.9455	1350.3	14.9455	101.895
LOWER HICKORY-5 <>	70.5068	41470.8	1.97232	11.5522	1.02002	2.73319	3.2673	0.229	3.104	0.950019	1329.25	37.2845	1337.53	24.2936	1350.77	19.6829	1350.77	19.6829	98.4069
LOWER HICKORY-7 <>	48.9542	17484.5	1.16971	11.5455	2.35984	2.75965	4.24361	0.231081	3.52695	0.83112	1340.16	42.6778	1344.7	31.6383	1351.9	45.5341	1351.9	45.5341	99.1317
LOWER HICKORY-38 <>	102.719	51482.9	1.39194	11.5419	0.719839	2.82063	1.9604	0.236114	1.82346	0.930146	1366.46	22.4533	1361.04	14.6966	1352.5	13.8864	1352.5	13.8864	101.032
LOWER HICKORY 2	339.191	36175.2	2.12489	11.5357	0.19256	2.68804	1.71721	0.224895	1.70637	0.993693	1307.69	20.1965	1325.17	12.7091	1353.53	3.71375	1353.53	3.71375	96.6133
LOWER HICKORY-15 <>	75.5602	34243.3	1.67369	11.5287	1.05289	2.8717	1.40396	0.240115	0.928725	0.661503	1387.29	11.5921	1374.52	10.574	1354.71	20.3063	1354.71	20.3063	102.406
LOWER HICKORY-76 <>	74.6036	56799.4	1.34825	11.5164	1.11675	2.84761	1.95324	0.237847	1.6025	0.820434	1375.5	19.8495	1368.18	14.6793	1356.76	21.5317	1356.76	21.5317	101.381
LOWER HICKORY-75 <>	193.26	120209	2.11297	11.5096	0.447339	2.81754	1.01803	0.235196	0.914485	0.898285	1361.67	11.2251	1360.21	7.62934	1357.9	8.62233	1357.9	8.62233	100.278
LOWER HICKORY-30 <>	99.8465	13155.3	1.57755	11.5069	1.05681	2.84185	1.63624	0.23717	1.24917	0.763441	1371.97	15.4373	1366.66	12.2902	1358.35	20.3718	1358.35	20.3718	101.002
LOWER HICKORY-90 <>	174.135	10810.6	1.83333	11.5069	1.29522	2.74023	5.40445	0.228689	5.24695	0.970857	1327.62	62.9567	1339.44	40.2251	1358.36	24.9671	1358.36	24.9671	97.7374
LOWER HICKORY-120 <>	131.219	10319.9	1.3367	11.4887	1.7548	2.61167	2.99559	0.217614	2.42781	0.81046	1269.26	27.9713	1303.92	21.9983	1361.41	33.8134	1361.41	33.8134	93.2312
LOWER HICKORY-27 <>	71.3403	50856.9	1.51591	11.4867	2.24081	2.83027	2.47554	0.235789	1.05217	0.425025	1364.77	12.9414	1363.59	18.5758	1361.74	43.1772	1361.74	43.1772	100.223
LOWER HICKORY-110 <>	63.3094	20785.7	1.57205	11.4848	1.27532	2.81642	2.90983	0.234597	2.61547	0.898839	1358.55	32.0382	1359.92	21.8075	1362.05	24.5711	1362.05	24.5711	99.7425
LOWER HICKORY-121 <>	36.1407	52169.8	1.02348	11.4827	1.97429	2.89944	3.96971	0.241466	3.44394	0.867556	1394.32	43.182	1381.77	29.9796	1362.41	38.0378	1362.41	38.0378	102.342
LOWER HICKORY 3	44.1812	55882.9	1.86956	11.4787	2.12796	2.81359	3.61441	0.234234	2.9216	0.80832	1356.65	35.7435	1359.16	27.083	1363.09	40.995	1363.09	40.995	99.5277
LOWER HICKORY-79 <>	183.278	133760	1.73702	11.4743	0.529465	2.84486	0.736068	0.236748	0.511334	0.694683	1369.77	6.30998	1367.46	5.53009	1363.82	10.1985	1363.82	10.1985	100.436
LOWER HICKORY-69 <>	139.313	28052.5	1.88864	11.4726	0.807339	2.76916	0.988633	0.230414	0.570613	0.577173	1336.67	6.88838	1347.26	7.37525	1364.11	15.5497	1364.11	15.5497	97.988
LOWER HICKORY 1	104.242	76625	1.43768	11.4588	0.75713	2.846	1.64169	0.236521	1.45668	0.887302	1368.59	17.9619	1367.75	12.3358	1366.43	14.5781	1366.43	14.5781	100.158
LOWER HICKORY-107 <>	58.0334	42755.2	1.78882	11.4512	1.39535	2.68244	1.89561	0.222782	1.2831	0.676876	1296.56	15.0699	1323.63	14.0217	1367.7	26.8631	1367.7	26.8631	94.7983
LOWER HICKORY-46 <>	107.945	32327.7	2.32315	11.4476	1.1824	2.88838	1.52805	0.23981	0.967924	0.633437	1385.71	12.069	1378.88	11.5258	1368.31	22.7601	1368.31	22.7601	101.271
LOWER HICKORY-28 <>	126.847	191729	1.64904	11.4345	1.19321	2.86995	1.79763	0.238008	1.34451	0.747936	1376.33	16.663	1374.06	13.5371	1370.51	22.9615	1370.51	22.9615	100.425
LOWER HICKORY-4 <>	76.3113	18789.6	1.44083	11.4213	1.62771	2.32006	2.54107	0.192183	1.9513	0.767906	1133.19	20.2776	1218.44	18.0321	1372.73	31.315	1372.73	31.315	82.5501
LOWER HICKORY-21 <>	192.06	49752.2	1.84662	11.4131	0.393644	2.81069	5.51886	0.232657	5.5048	0.997453	1348.41	66.9807	1358.39	41.3551	1374.11	7.5721	1374.11	7.5721	98.1294
LOWER HICKORY-70 <>	94.12	42532.6	1.88373	11.4092	1.36182	2.86815	2.66715	0.237332	2.29328	0.859825	1372.81	28.3563	1373.59	20.0832	1374.78	26.1909	1374.78	26.1909	99.8572
LOWER HICKORY-101 <>	58.3742	58846.7	1.92544	11.4072	1.28736	2.90293	1.54107	0.240167	0.84712	0.549695	1387.56	10.5754	1382.68	11.6391	1375.12	24.7576	1375.12	24.7576	100.905
LOWER HICKORY-59 <>	205.688	108784	2.13844	11.4003	0.278854	2.86809	0.913459	0.237141	0.869854	0.952265	1371.82	10.7486	1373.57	6.87736	1376.28	5.36141	1376.28	5.36141	99.676
LOWER HICKORY-82 <>	81.6814	49207.7	1.74198	11.396	1.34677	2.8762	1.9927	0.237723	1.4687	0.737037	1374.85	18.1844	1375.7	15.0147	1376.99	25.8937	1376.99	25.8937	99.8443
LOWER HICKORY-104 <>	64.8065	33573.8	1.7306	11.394	1.84481	2.85308	1.97375	0.23577	0.701676	0.355504	1364.67	8.62989	1369.62	14.8408	1377.34	35.4696	1377.34	35.4696	99.0798
LOWER HICKORY-40 <>	67.7317	59740.5	1.14822	11.3903	1.35574	2.88166	1.56501	0.238056	0.78182	0.499561	1376.58	9.69089	1377.13	11.7976	1377.96	26.0626	1377.96	26.0626	99.9001
LOWER HICKORY-72 <>	71.9926	74313.1	1.56331	11.3862	1.05473	2.90005	1.28578	0.239488	0.735369	0.571925	1384.03	9.15937	1381.93	9.70833	1378.65	20.2741	1378.65	20.2741	100.39
LOWER HICKORY-51 <>	93.0715	131931	1.54963	11.3839	0.604316	2.88419	1.22001	0.238129	1.05982	0.8687	1376.96	13.14	1377.79	9.19871	1379.05	11.6146	1379.05	11.6146	99.8484
LOWER HICKORY-9 <>	130.758	45712.4	1.12819	11.382	0.9364	2.74548	4.82296	0.226641	4.73118	0.980971	1316.87	56.3533	1340.86	35.9117	1379.36	17.9979	1379.36	17.9979	95.4699
LOWER HICKORY-114 <>	157.478	121637	1.60186	11.3785	0.599697	2.92488	1.5705	0.241375	1.4515	0.924224	1393.84	18.1938	1388.37	11.8842	1379.96	11.5244	1379.96	11.5244	101.006
LOWER HICKORY-116 <>	34.3294	42803.3	1.0526	11.3779	2.61616	2.89701	9.90957	0.239062	9.558	0.964522	1381.82	118.892	1381.13	74.936	1380.06	50.2843	1380.06	50.2843	100.128
LOWER HICKORY-89 <>	153.915	40474.1	2.88114	11.3754	0.90187	2.76989	1.88076	0.228522	1.65042	0.877529	1326.75	19.7906	1347.46	14.0322	1380.48	17.3316	1380.48	17.3316	96.1074
LOWER HICKORY-102 <>	226.356	17174	1.48861	11.3723	0.769848	2.76991	6.26981	0.228461	6.22237	0.992433	1326.43	74.6009	1347.46	46.8087	1381	14.7936	1381	14.7936	96.0484
LOWER HICKORY-85 <>	167.365	199254	1.75833	11.3672	0.495086	2.88616	2.00463	0.237944	1.94254	0.969023	1376	24.0692	1378.3	15.1181	1381.86	9.51159	1381.86	9.51159	99.5757
LOWER HICKORY-19 <>	195.192	98937.6	2.03552	11.3644	0.396107	2.89762	1.22361	0.238829	1.15772	0.946153	1380.61	14.3879	1381.29	9.23689	1382.34	7.60948	1382.34	7.60948	99.875
LOWER HICKORY-36 <>	56.1442	39977.8	1.03128	11.3583	1.56432	2.84993	1.81143	0.234772	0.913328	0.504204	1359.46	11.1945	1368.79	13.6163	1383.37	30.0503	1383.37	30.0503	98.2718
LOWER HICKORY-105 <>	57.2897	13430.5	0.957331	11.3583	2.09587	2.96478	2.84294	0.244234	1.92085	0.675655	1408.67	24.3062	1398.64	21.5892	1383.37	40.2626	1383.37	40.2626	101.829
LOWER HICKORY-98 <>	58.1334	27191.6	1.18356	11.3568	2.25255	2.86115	4.7985	0.235666	4.23694	0.882971	1364.12	52.0925	1371.75	36.1196	1383.62	43.273	1383.62	43.273	98.591
LOWER HICKORY-12 <>	124.085	110589	1.78628	11.3515	0.484056	2.87905	1.78684	0.237028	1.72002	0.962607	1371.23	21.2459	1376.44	13.4668	1384.52	9.29628	1384.52	9.29628	99.0398
LOWER HICKORY-43 <>	47.6696	33052.9	1.93126	11.3496	1.79524	2.8272	2.86474	0.232721	2.23245	0.779287	1348.74	27.1691	1362.78	21.4909	1384.84	34.4798	1384.84	34.4798	97.3934
LOWER HICKORY-60 <>	44.0092	21581.2	2.12508	11.3373	2.2613	2.86763	2.89103	0.235793	1.80127	0.623056	1364.79	22.1557	1373.45	21.7684	1386.93	43.4202	1386.93	43.4202	98.4037
LOWER HICKORY-81 <>	60.9845	30167.5	1.27203	11.3345	1.76151	2.93793	1.86668	0.241515	0.617716	0.330917	1394.57	7.74639	1391.74	14.1417	1387.39	33.8202	1387.39	33.8202	100.517
LOWER HICKORY-84 <>	91.6336	93453.9	1.49591	11.3333	0.89767	2.86986	2.69699	0.235893	2.54322	0.942983	1365.31	31.2924	1374.04	20.3111	1387.6	17.2327	1387.6	17.2327	98.3934
LOWER HICKORY-92 <>	137.516	129126	1.97589	11.332	0.717971	2.89519	1.84281	0.237947	1.69719	0.920981	1376.01	21.0295	1380.66	13.9087	1387.83	13.7825	1387.83	13.7825	99.1488
LOWER HICKORY-13 <>	223.424	7358.96	1.94286	11.3247	0.845391	2.64148	2.03175	0.216957	1.84751	0.909323	1265.77	21.2327	1312.27	14.9658	1389.06	16.2259	1389.06	16.2259	91.1246
LOWER HICKORY-94 <>	56.7964	35822.6	1.37546	11.3213	1.28121	2.90333	2.78874	0.238393	2.47701	0.888217	1378.34	30.7386	1382.78	21.065	1389.63	24.5908	1389.63	24.5908	99.1875
LOWER HICKORY-99 <>	136.076	70490.8	1.55411	11.3191	1.08293	2.85907	3.08521	0.234713	2.88891	0.936372	1359.15	35.4019	1371.2	23.2131	1390	20.7826	1390	20.7826	97.7805
LOWER HICKORY-124 <>	40.0473	24726.5	2.04021	11.3118	3.52314	2.91594	3.65537	0.239225	0.974279	0.266534	1382.67	12.1243	1386.05	27.6446	1391.25	67.6228	1391.25	67.6228	99.3828
LOWER HICKORY-55 <>	75.1782	24105.6	1.39531	11.3072	1.50039	2.90217	1.98709	0.238	1.30284	0.65565	1376.29	16.146	1382.48	15.0071	1392.02	28.7882	1392.02	28.7882	98.8699
LOWER HICKORY-66 <>	54.8654	12684.6	1.74412	11.2918	1.19215	2.89543	2.42555	0.237123	2.11236	0.870879	1371.72	26.1005	1380.72	18.3081	1394.64	22.8642	1394.64	22.8642	98.3565
LOWER HICKORY-53 <>	72.0019	123936	1.67706	11.2829	2.46905	2.87256	2.58803	0.235066	0.775675	0.299716	1361	9.51696	1374.74	19.495	1396.14	47.351	1396.14	47.351	97.4827
LOWER HICKORY-29 <>	157.272	367135	1.60898	11.2762	0.932521	2.96363	1.50984	0.242373	1.18744	0.786469	1399.02	14.9336	1398.34	11.4633	1397.3	17.8781	1397.3	17.8781	100.124
LOWER HICKORY-123 <>	67.663	36457.8	2.14999	11.2742	0.838663	2.91467	0.99997	0.238326	0.544597	0.544613	1377.99	6.75664	1385.72	7.55996	1397.64	16.0779	1397.64	16.0779	98.5943
LOWER HICKORY-23 <>	38.4915	36099	1.77906	11.2691	2.63197	2.92807	4.65937	0.239314	3.84479	0.825175	1383.13	47.8615	1389.19	35.2804	1398.5	50.46	1398.5	50.46	98.9012
LOWER HICKORY-100 <>	51.9608	19914.5	1.13953	11.2678	1.67454	2.90485	2.9331	0.23739	2.40811	0.821013	1373.11	29.782	1383.17	22.1587	1398.71	32.1007	1398.71	32.1007	98.17
LOWER HICKORY-103 <>	82.7416	21324.4	0.70315	11.2656	0.907428	2.76715	1.12641	0.226093	0.667364	0.59247	1313.99	7.93313	1346.72	8.40148	1399.09	17.3928	1399.09	17.3928	93.9177
LOWER HICKORY-71 <>	184.237	37274.3	1.38396	11.2639	0.731633	2.95745	1.70533	0.241605	1.54042	0.903292	1395.03	19.3232	1396.76	12.9409	1399.38	14.0227	1399.38	14.0227	99.6892
LOWER HICKORY-118 <>	126.965	103773	1.09587	11.2612	0.577822	2.98679	0.938574	0.243943	0.739623	0.788029	1407.16	9.35012	1404.26	7.13981	1399.84	11.0739	1399.84	11.0739	100.523
LOWER HICKORY-91 <>	44.7138	34161.7	1.83596	11.2556	2.45272	2.88872	3.1421	0.235817	1.96391	0.625032	1364.91	24.1581	1378.97	23.7043	1400.79	47.0079	1400.79	47.0079	97.439
LOWER HICKORY-24 <>	82.8295	83246.8	1.38302	11.2278	0.814432	2.96062	1.36311	0.241089	1.09306	0.801883	1392.35	13.6878	1397.57	10.3466	1405.53	15.5966	1405.53	15.5966	99.0626
LOWER HICKORY-54 <>	111.861	55232.3	1.15518	11.1995	0.677104	2.95674	1.29706	0.240165	1.1063	0.852928	1387.56	13.8109	1396.58	9.84191	1410.36	12.9581	1410.36	12.9581	98.383
LOWER HICKORY-77 <>	87.92	47362.1	1.7504	11.1922	0.85152	2.97771	1.36112	0.241712	1.06186	0.780141	1395.59	13.3249	1401.95	10.3464	1411.61	16.2934	1411.61	16.2934	98.8652
LOWER HICKORY-34 <>	54.6646	4173.95	1.69282	11.1337	5.54368	2.99747	5.89683	0.242044	2.01004	0.340868	1397.31	25.2513	1406.98	44.9264	1421.63	106.011	1421.63	106.011	98.2897
LOWER HICKORY-42 <>	64.1082	12370.4	1.28632	11.1249	0.918763	2.98423	1.42139	0.240784	1.08453	0.763012	1390.77	13.5673	1403.61	10.8105	1423.14	17.5526	1423.14	17.5526	97.726
LOWER HICKORY-106 <>	108.972	12556.9	1.88743	11.1216	1.1418	2.99682	1.54761	0.241727	1.0447	0.675039	1395.67	13.1102	1406.81	11.7831	1423.71	21.8122	1423.71	21.8122	98.0305
LOWER HICKORY-95 <>	38.9438	5892.34	1.0624	11.0949	3.4764	2.99439	3.80438	0.240952	1.54531	0.406192	1391.64	19.3424	1406.19	28.9661	1428.3	66.3884	1428.3	66.3884	97.4337
LOWER HICKORY-117 <>	40.5806	57963.8	1.3913	11.0832	2.93876	3.0294	4.13227	0.243513	2.90507	0.703019	1404.93	36.6733	1415.06	31.5555	1430.31	56.0999	1430.31	56.0999	98.2259
LOWER HICKORY-87 <>	77.666	75784.5	2.63975	11.0767	1.50461	3.07723	2.98097	0.247212	2.57339	0.863272	1424.08	32.8819	1427.04	22.8484	1431.43	28.7137	1431.43	28.7137	99.4862
Upper Hickory sandstone, sample 2 (Late Cambrian)
UPPER HICKORY-36 <>	218.52	2495.24	1.07632	16.8161	3.64188	0.672778	4.11972	0.082053	1.92583	0.467467	508.366	9.41418	522.4	16.8256	584.212	79.0944	508.366	9.41418	87.0172
UPPER HICKORY-53 <>	215.484	29920.5	1.46015	17.2405	1.96107	0.676495	3.31468	0.0845887	2.67232	0.806208	523.454	13.4355	524.654	13.5819	529.899	42.9559	523.454	13.4355	98.7838
UPPER HICKORY-38 <>	162.964	15941.3	1.3488	16.7539	1.93104	0.709197	2.39984	0.0861751	1.42489	0.593745	532.876	7.28757	544.269	10.1112	592.262	41.8669	532.876	7.28757	89.973
UPPER HICKORY-82 <>	278.592	48486	1.04049	17.239	2.23023	0.691599	2.80958	0.0864698	1.70874	0.608186	534.625	8.76682	533.761	11.664	530.09	48.8811	534.625	8.76682	100.856
UPPER HICKORY-110 <>	272.362	80830.2	0.929587	17.2977	1.77535	0.689745	2.1396	0.0865317	1.19416	0.558124	534.993	6.13075	532.647	8.8683	522.591	38.9471	534.993	6.13075	102.373
UPPER HICKORY-30 <>	102.33	45604.2	1.02719	13.5213	1.65913	1.82956	2.30595	0.179417	1.60147	0.694494	1063.79	15.7049	1056.12	15.1405	1040.29	33.5103	1040.29	33.5103	102.259
UPPER HICKORY-49 <>	44.2256	4884.06	0.753239	13.055	3.48241	2.03817	3.62502	0.192981	1.00676	0.277726	1137.51	10.4985	1128.35	24.6976	1110.75	69.5935	1110.75	69.5935	102.409
UPPER HICKORY-63 <>	58.4945	31885.2	2.11251	13.0242	2.74827	2.01605	3.33317	0.190437	1.88601	0.565831	1123.74	19.4495	1120.93	22.6267	1115.46	54.8631	1115.46	54.8631	100.742
UPPER HICKORY-113 <>	37.3868	22364.7	1.50754	13.0095	4.59522	1.99452	5.56055	0.18819	3.13107	0.563087	1111.56	31.9687	1113.65	37.6233	1117.76	91.7312	1117.76	91.7312	99.4455
UPPER HICKORY-19 <>	27.1426	20738.2	1.70269	12.9777	3.87521	2.06715	6.17686	0.194568	4.81003	0.778717	1146.07	50.505	1137.99	42.2947	1122.6	77.2725	1122.6	77.2725	102.091
UPPER HICKORY-54 <>	107.882	39110.8	2.09064	12.9715	1.63123	1.98768	3.37177	0.186997	2.95092	0.875183	1105.09	29.9684	1111.33	22.781	1123.57	32.5207	1123.57	32.5207	98.3552
UPPER HICKORY-13 <>	61.7955	28110.2	1.13962	12.8968	2.10024	1.99583	2.40438	0.186683	1.17049	0.486816	1103.38	11.8702	1114.1	16.2659	1135.06	41.8023	1135.06	41.8023	97.2086
UPPER HICKORY-92 <>	138.551	81215.1	1.85651	12.8635	1.0833	2.01387	1.24572	0.187885	0.615052	0.49373	1109.91	6.27115	1120.2	8.45218	1140.23	21.5246	1140.23	21.5246	97.3403
UPPER HICKORY-31 <>	47.1593	48472.6	1.38801	12.8306	4.35847	2.01937	5.7139	0.187915	3.69491	0.646654	1110.07	37.6794	1122.05	38.8216	1145.32	86.6488	1145.32	86.6488	96.9221
UPPER HICKORY-114 <>	58.7525	8139.65	1.64639	12.8083	3.23025	2.01416	3.76474	0.187105	1.93359	0.513604	1105.67	19.6462	1120.29	25.5496	1148.78	64.1701	1148.78	64.1701	96.2473
UPPER HICKORY-34 <>	93.9293	58906.3	1.14554	12.7437	1.34514	2.05062	1.57462	0.189532	0.818541	0.519835	1118.84	8.40746	1132.5	10.7478	1158.78	26.6883	1158.78	26.6883	96.5533
UPPER HICKORY-97 <>	48.7223	48390.4	2.40763	12.6522	2.28232	2.07087	2.77148	0.190029	1.57231	0.567315	1121.53	16.1852	1139.22	18.9795	1173.09	45.1562	1173.09	45.1562	95.6049
UPPER HICKORY-21 <>	37.0344	23977.6	0.882549	11.642	3.54648	2.81564	4.15519	0.237741	2.16519	0.521082	1374.94	26.8097	1359.71	31.1434	1335.82	68.5782	1335.82	68.5782	102.928
UPPER HICKORY-67 <>	61.1315	28064.6	1.53712	11.6365	2.18078	2.82904	4.49671	0.23876	3.9325	0.874529	1380.25	48.8618	1363.27	33.7468	1336.73	42.1682	1336.73	42.1682	103.255
UPPER HICKORY-104 <>	94.2124	63682.5	1.37491	11.633	1.96179	2.79601	3.44082	0.235901	2.82677	0.821539	1365.35	34.7823	1354.47	25.7393	1337.32	37.9289	1337.32	37.9289	102.096
UPPER HICKORY-115 <>	113.509	183788	2.28368	11.6076	1.28793	2.75497	4.77024	0.231931	4.59309	0.962862	1344.61	55.7451	1343.43	35.5515	1341.54	24.8846	1341.54	24.8846	100.229
UPPER HICKORY-24 <>	43.1265	24073.5	1.25666	11.5953	2.62876	2.81274	3.25914	0.236543	1.92656	0.591124	1368.7	23.7576	1358.94	24.4179	1343.6	50.7833	1343.6	50.7833	101.868
UPPER HICKORY-87 <>	52.4134	32871.4	0.621438	11.5892	1.79897	2.84138	2.35195	0.238826	1.51505	0.644166	1380.59	18.8285	1366.54	17.6662	1344.61	34.7463	1344.61	34.7463	102.676
UPPER HICKORY-44 <>	76.9808	198337	1.19291	11.5721	1.67193	2.86851	2.05472	0.240751	1.19437	0.581282	1390.6	14.9397	1373.68	15.4713	1347.46	32.2789	1347.46	32.2789	103.202
UPPER HICKORY-79 <>	76.7306	71567.8	1.54292	11.565	1.81957	2.8515	2.03114	0.239175	0.902602	0.444382	1382.41	11.2305	1369.21	15.2703	1348.65	35.1236	1348.65	35.1236	102.503
UPPER HICKORY-93 <>	106.589	27630.9	1.16957	11.5471	1.2878	2.78519	4.02008	0.233253	3.80823	0.947302	1351.53	46.4327	1351.57	30.0441	1351.63	24.8483	1351.63	24.8483	99.9926
UPPER HICKORY-81 <>	116.774	122924	1.31569	11.5375	0.672904	2.87033	1.48571	0.240182	1.32459	0.891552	1387.64	16.5369	1374.16	11.1883	1353.24	12.9798	1353.24	12.9798	102.542
UPPER HICKORY-52 <>	79.4359	15088.5	1.08897	11.5341	1.22292	2.66665	1.67883	0.223074	1.1502	0.685119	1298.1	13.5235	1319.27	12.3981	1353.81	23.588	1353.81	23.588	95.8849
UPPER HICKORY-78 <>	101.258	42466.7	1.74858	11.4983	0.929923	2.89933	2.56047	0.241785	2.38563	0.931717	1395.97	29.9439	1381.74	19.3335	1359.8	17.9225	1359.8	17.9225	102.66
UPPER HICKORY-103 <>	79.1851	29120.8	0.73507	11.4941	1.74098	2.86036	2.90367	0.238449	2.32385	0.800315	1378.63	28.8434	1371.54	21.8493	1360.5	33.5513	1360.5	33.5513	101.333
UPPER HICKORY-95 <>	93.1572	27110.6	1.00566	11.4934	1.67946	2.77795	4.10645	0.231564	3.74732	0.912543	1342.69	45.4214	1349.63	30.6688	1360.62	32.3653	1360.62	32.3653	98.6825
UPPER HICKORY-59 <>	79.1697	20548.5	0.870045	11.4869	0.720457	2.83245	1.28299	0.235973	1.06161	0.827448	1365.73	13.0659	1364.17	9.62839	1361.71	13.8809	1361.71	13.8809	100.295
UPPER HICKORY-106 <>	66.6187	45667.6	0.648926	11.4866	2.44581	2.8443	3.30483	0.236955	2.2226	0.672531	1370.85	27.447	1367.3	24.8327	1361.76	47.1288	1361.76	47.1288	100.667
UPPER HICKORY-75 <>	97.1029	55187.7	1.53552	11.4848	0.747615	2.88021	2.05176	0.239909	1.9107	0.931251	1386.22	23.8325	1376.75	15.4653	1362.06	14.4035	1362.06	14.4035	101.774
UPPER HICKORY-48 <>	40.8609	26466.5	0.976113	11.4784	2.87098	2.85321	3.82725	0.237527	2.53087	0.661277	1373.83	31.3149	1369.66	28.7836	1363.13	55.3142	1363.13	55.3142	100.785
UPPER HICKORY-99 <>	164.863	34365.9	1.5199	11.4694	0.852176	2.73953	1.89915	0.227884	1.69722	0.893675	1323.4	20.3056	1339.25	14.1279	1364.65	16.412	1364.65	16.412	96.977
UPPER HICKORY-62 <>	81.9877	67924.5	1.59287	11.4647	2.44897	2.8516	4.37095	0.237111	3.62045	0.8283	1371.66	44.7333	1369.23	32.8703	1365.43	47.1651	1365.43	47.1651	100.456
UPPER HICKORY-73 <>	94.0425	48377.3	1.78309	11.4551	1.15867	2.92845	4.22907	0.243297	4.06725	0.961736	1403.81	51.3085	1389.29	32.021	1367.04	22.3073	1367.04	22.3073	102.69
UPPER HICKORY-112 <>	102.999	37865.6	0.857978	11.4479	1.59424	2.84926	2.04575	0.236568	1.28199	0.62666	1368.83	15.8103	1368.62	15.3769	1368.27	30.6896	1368.27	30.6896	100.041
UPPER HICKORY-69 <>	116.101	80027.4	1.68961	11.4478	0.686707	2.82945	2.39883	0.234921	2.29843	0.95815	1360.24	28.1861	1363.38	17.9986	1368.28	13.2189	1368.28	13.2189	99.4119
UPPER HICKORY-80 <>	161.791	7926.22	1.24493	11.4447	1.05974	2.72519	8.58867	0.226204	8.52304	0.992358	1314.57	101.365	1335.35	63.8817	1368.8	20.3978	1368.8	20.3978	96.0388
UPPER HICKORY-119 <>	88.3582	36542.6	1.60736	11.4368	1.99277	2.82704	2.42506	0.234495	1.38194	0.569861	1358.01	16.9221	1362.74	18.1914	1370.14	38.3521	1370.14	38.3521	99.1153
UPPER HICKORY-32 <>	103.86	87991.3	1.60844	11.4316	0.76648	2.93285	1.38868	0.243162	1.158	0.833879	1403.12	14.6014	1390.43	10.5155	1371	14.7489	1371	14.7489	102.342
UPPER HICKORY-105 <>	93.5872	46563.3	1.71897	11.4291	1.07474	2.84218	1.43274	0.235592	0.947459	0.66129	1363.74	11.6457	1366.75	10.7619	1371.43	20.6791	1371.43	20.6791	99.4393
UPPER HICKORY-18 <>	85.425	59979.3	1.0021	11.4192	1.75051	2.91938	2.70928	0.241782	2.06782	0.763237	1395.95	25.9544	1386.95	20.4935	1373.1	33.6759	1373.1	33.6759	101.665
UPPER HICKORY-118 <>	154.415	53261.7	1.82864	11.4122	0.79689	2.96941	2.89046	0.245776	2.77844	0.961245	1416.65	35.3364	1399.83	21.9588	1374.27	15.3272	1374.27	15.3272	103.084
UPPER HICKORY-72 <>	135.582	76323.6	0.717626	11.4092	1.09856	2.7753	2.62504	0.229648	2.38411	0.90822	1332.65	28.7032	1348.91	19.5965	1374.78	21.1278	1374.78	21.1278	96.9361
UPPER HICKORY-101 <>	31.5378	25173.8	0.774587	11.4088	5.09656	2.86672	6.76379	0.237206	4.44678	0.657439	1372.16	54.9614	1373.21	50.9597	1374.84	98.078	1374.84	98.078	99.8051
UPPER HICKORY-65 <>	123.155	81970.2	0.832502	11.4088	1.0834	2.89341	2.40418	0.239414	2.14624	0.89271	1383.65	26.7259	1380.19	18.1436	1374.84	20.836	1374.84	20.836	100.641
UPPER HICKORY-55 <>	160.094	49597.2	1.10252	11.4084	0.798294	2.90823	1.76362	0.240632	1.5726	0.89169	1389.98	19.6629	1384.05	13.3262	1374.91	15.3529	1374.91	15.3529	101.096
UPPER HICKORY-27 <>	101.24	73506.3	1.81613	11.4076	0.965463	2.65638	1.62482	0.219778	1.30687	0.804319	1280.7	15.1794	1316.42	11.9865	1375.04	18.5674	1375.04	18.5674	93.1392
UPPER HICKORY-6 <>	126.765	28240	1.3947	11.4035	1.09107	2.80397	2.325	0.231906	2.0531	0.883051	1344.48	24.9152	1356.6	17.4033	1375.73	20.9809	1375.73	20.9809	97.7284
UPPER HICKORY-17 <>	59.1022	30550.6	1.37068	11.4034	1.75482	2.87647	3.84506	0.237899	3.42127	0.889784	1375.76	42.3857	1375.77	28.9784	1375.75	33.7465	1375.75	33.7465	100.001
UPPER HICKORY-70 <>	49.4055	50213.7	1.12014	11.403	1.85445	2.87547	2.01962	0.237808	0.799929	0.396078	1375.29	9.90701	1375.51	15.2166	1375.83	35.6624	1375.83	35.6624	99.961
UPPER HICKORY-64 <>	28.6848	21222.1	1.35313	11.3984	4.90689	2.84575	6.12472	0.235256	3.66532	0.598448	1361.99	45.0009	1367.69	46.05	1376.59	94.4011	1376.59	94.4011	98.9389
UPPER HICKORY-122 <>	107.95	56135.9	2.02443	11.3958	0.995121	2.80981	1.60676	0.232231	1.26151	0.785128	1346.18	15.3264	1358.16	12.033	1377.03	19.1325	1377.03	19.1325	97.7596
UPPER HICKORY-26 <>	54.1612	52572.1	0.977749	11.3956	1.8784	2.90038	4.57208	0.239712	4.1684	0.911707	1385.2	51.9596	1382.01	34.535	1377.08	36.1167	1377.08	36.1167	100.59
UPPER HICKORY-117 <>	65.2667	22431.8	1.2547	11.3775	1.16645	2.86959	2.10644	0.23679	1.75399	0.83268	1369.99	21.6479	1373.96	15.8624	1380.13	22.4171	1380.13	22.4171	99.2652
UPPER HICKORY-8 <>	99.695	25864	0.529667	11.3734	0.971645	2.7102	2.98053	0.223558	2.81771	0.945371	1300.65	33.1882	1331.26	22.1104	1380.82	18.6716	1380.82	18.6716	94.1942
UPPER HICKORY-100 <>	112.91	81547.9	1.60992	11.373	1.01605	2.88414	1.26611	0.237897	0.755432	0.596656	1375.75	9.35875	1377.77	9.5463	1380.89	19.5246	1380.89	19.5246	99.628
UPPER HICKORY-56 <>	86.1298	44938.9	1.26547	11.3696	0.884625	2.80612	1.34051	0.231393	1.00718	0.751339	1341.8	12.2005	1357.17	10.0355	1381.46	16.9979	1381.46	16.9979	97.129
UPPER HICKORY-20 <>	38.3368	17173.2	1.14479	11.3626	2.13206	2.91739	3.37922	0.240419	2.62172	0.775837	1388.88	32.7574	1386.43	25.5585	1382.65	40.9635	1382.65	40.9635	100.451
UPPER HICKORY-77 <>	83.3493	45546.6	1.85065	11.3624	1.5248	2.9657	3.46015	0.244396	3.10606	0.897667	1409.51	39.325	1398.87	26.2802	1382.68	29.2938	1382.68	29.2938	101.94
UPPER HICKORY-116 <>	93.2922	45743.5	0.679791	11.3589	1.67644	2.89164	2.06139	0.238221	1.19953	0.581902	1377.44	14.8769	1379.73	15.5538	1383.26	32.2049	1383.26	32.2049	99.5794
UPPER HICKORY-85 <>	85.8137	7398.73	0.972592	11.3531	2.37762	2.69695	3.06512	0.222069	1.93439	0.631099	1292.8	22.6598	1327.62	22.708	1384.25	45.6723	1384.25	45.6723	93.3934
UPPER HICKORY-43 <>	100.597	44654	0.870256	11.3494	1.59593	2.84121	1.87787	0.23387	0.989655	0.527008	1354.75	12.0923	1366.49	14.1046	1384.88	30.6513	1384.88	30.6513	97.8247
UPPER HICKORY-123 <>	69.4561	26392.7	0.726391	11.3468	1.92766	2.85699	4.79579	0.235115	4.39133	0.915663	1361.25	53.8886	1370.65	36.0856	1385.32	37.021	1385.32	37.021	98.2628
UPPER HICKORY-15 <>	65.9696	64402.4	1.42229	11.3467	1.03476	2.8993	2.96744	0.238595	2.78119	0.937233	1379.39	34.537	1381.73	22.4073	1385.33	19.8722	1385.33	19.8722	99.5707
UPPER HICKORY-96 <>	106.253	63057.7	1.45213	11.3457	1.51423	2.96728	4.54883	0.244169	4.2894	0.942968	1408.33	54.267	1399.28	34.5591	1385.49	29.0797	1385.49	29.0797	101.649
UPPER HICKORY-23 <>	80.2831	15371.5	1.45943	11.3454	2.12154	2.76956	5.41898	0.227893	4.98643	0.920178	1323.45	59.661	1347.37	40.448	1385.54	40.7438	1385.54	40.7438	95.5182
UPPER HICKORY-60 <>	132.439	55392.9	1.77688	11.3435	0.854596	2.82633	1.36986	0.232524	1.0706	0.781538	1347.72	13.0202	1362.55	10.2745	1385.87	16.4097	1385.87	16.4097	97.2466
UPPER HICKORY-37 <>	118.66	10974.1	1.47928	11.3422	1.22103	2.94537	3.00975	0.24229	2.75094	0.914009	1398.59	34.5872	1393.66	22.8184	1386.1	23.447	1386.1	23.447	100.901
UPPER HICKORY-45 <>	73.7452	62246.1	1.99296	11.339	2.22504	2.92831	2.59375	0.240819	1.33296	0.513911	1390.95	16.677	1389.26	19.6347	1386.64	42.7255	1386.64	42.7255	100.311
UPPER HICKORY-76 <>	65.0848	6701.37	1.13749	11.3335	1.92565	2.62434	4.24391	0.215716	3.78189	0.891132	1259.2	43.2597	1307.48	31.2122	1387.57	36.971	1387.57	36.971	90.7487
UPPER HICKORY-39 <>	98.6972	35619.4	0.591211	11.3312	1.00388	3.00486	2.60239	0.246944	2.40098	0.922603	1422.7	30.6521	1408.85	19.8287	1387.96	19.2707	1387.96	19.2707	102.503
UPPER HICKORY-25 <>	134.757	78986.7	1.9306	11.3233	0.866902	2.91477	1.42237	0.239373	1.12766	0.792802	1383.44	14.0401	1385.75	10.7536	1389.29	16.6382	1389.29	16.6382	99.5784
UPPER HICKORY-40 <>	35.6817	19993.8	0.720014	11.3226	2.11127	2.92825	3.3818	0.240466	2.6418	0.781181	1389.12	33.0134	1389.24	25.6023	1389.41	40.5253	1389.41	40.5253	99.9789
UPPER HICKORY-9 <>	88.0473	38236.5	1.12614	11.3188	1.54972	2.8492	2.0824	0.233896	1.39096	0.667959	1354.88	16.9972	1368.6	15.6524	1390.06	29.7428	1390.06	29.7428	97.4695
UPPER HICKORY-121 <>	134.956	121058	1.1962	11.3174	0.816926	2.76609	0.994043	0.227046	0.566351	0.569745	1319	6.75549	1346.44	7.41342	1390.29	15.6769	1390.29	15.6769	94.8723
UPPER HICKORY-35 <>	197.51	124872	10.5677	11.3162	0.455726	2.84277	3.24296	0.233314	3.21078	0.990077	1351.84	39.1563	1366.9	24.3642	1390.5	8.74506	1390.5	8.74506	97.2198
UPPER HICKORY-33 <>	56.9754	52364.9	0.880456	11.3098	2.51217	2.94027	4.42144	0.24118	3.63842	0.822905	1392.83	45.577	1392.34	33.5129	1391.58	48.2079	1391.58	48.2079	100.09
UPPER HICKORY-42 <>	45.5152	18944.1	0.841157	11.3055	1.79043	2.86005	3.28846	0.234511	2.75831	0.838786	1358.1	33.7779	1371.46	24.7451	1392.31	34.3526	1392.31	34.3526	97.5427
UPPER HICKORY-102 <>	112.321	64414.2	0.935525	11.2982	0.838609	2.84475	1.80918	0.233106	1.60308	0.886082	1350.76	19.5357	1367.43	13.593	1393.55	16.0858	1393.55	16.0858	96.9291
UPPER HICKORY-111 <>	77.6578	44351	1.68445	11.2907	1.64185	2.87865	2.21474	0.235727	1.4864	0.671142	1364.44	18.2786	1376.34	16.6917	1394.83	31.4907	1394.83	31.4907	97.8219
UPPER HICKORY-12 <>	136.136	36740	1.69353	11.2833	1.403	2.77595	2.99708	0.227168	2.64842	0.883664	1319.64	31.6046	1349.09	22.3761	1396.08	26.9032	1396.08	26.9032	94.5243
UPPER HICKORY-86 <>	72.8762	58650.6	1.94078	11.2816	1.40426	2.91998	1.5259	0.238919	0.597027	0.391262	1381.08	7.42199	1387.1	11.5417	1396.37	26.9263	1396.37	26.9263	98.9049
UPPER HICKORY-88 <>	112.291	11714.6	1.68809	11.2769	0.963062	2.67118	2.74997	0.21847	2.57582	0.936672	1273.78	29.7723	1320.52	20.3195	1397.17	18.464	1397.17	18.464	91.1686
UPPER HICKORY-71 <>	52.1232	22967.5	1.95408	11.2729	3.1207	2.94074	3.44558	0.240431	1.46057	0.423897	1388.94	18.2499	1392.47	26.1136	1397.86	59.8402	1397.86	59.8402	99.3619
UPPER HICKORY-98 <>	97.4754	5680.72	1.0107	11.2725	1.18871	2.67109	3.06599	0.218377	2.82617	0.921782	1273.3	32.6548	1320.5	22.6551	1397.92	22.7881	1397.92	22.7881	91.085
UPPER HICKORY-125 <>	77.318	48770.5	1.89409	11.2637	1.36544	2.83516	3.63833	0.23161	3.37238	0.926906	1342.93	40.8832	1364.89	27.3168	1399.42	26.1711	1399.42	26.1711	95.9635
UPPER HICKORY-50 <>	114.443	9847.7	1.07097	11.2586	1.39439	2.57286	2.39217	0.210087	1.94374	0.812544	1229.28	21.7541	1292.95	17.493	1400.29	26.7229	1400.29	26.7229	87.7879
UPPER HICKORY-47 <>	154.797	18462.8	1.0407	11.2579	1.79415	3.0048	5.89336	0.245342	5.61362	0.952533	1414.41	71.2955	1408.84	44.9273	1400.4	34.3859	1400.4	34.3859	101
UPPER HICKORY-109 <>	104.173	35105.7	0.893353	11.2535	0.510622	2.95771	2.33393	0.241402	2.27739	0.975774	1393.98	28.5488	1396.83	17.7123	1401.16	9.78427	1401.16	9.78427	99.4879
UPPER HICKORY-57 <>	64.1528	8731.11	1.07026	11.2531	1.30641	2.88385	3.20772	0.235366	2.92963	0.913308	1362.56	35.9819	1377.7	24.189	1401.22	25.0333	1401.22	25.0333	97.2408
UPPER HICKORY-29 <>	144.665	56271	2.1683	11.25	0.635163	2.93938	1.38145	0.239832	1.22678	0.888034	1385.83	15.2978	1392.11	10.4667	1401.75	12.1697	1401.75	12.1697	98.8642
UPPER HICKORY-46 <>	124.72	36297.7	1.1581	11.2342	0.657941	2.89832	2.83228	0.23615	2.7548	0.972644	1366.65	33.9258	1381.48	21.3845	1404.44	12.6015	1404.44	12.6015	97.3097
UPPER HICKORY-2 <>	88.4174	71599.8	0.753949	11.2308	1.15813	2.93323	2.89551	0.238922	2.65381	0.916527	1381.09	32.9917	1390.53	21.929	1405.01	22.1804	1405.01	22.1804	98.2973
UPPER HICKORY-94 <>	34.2225	19954.8	0.848917	11.2225	1.9249	2.95977	3.14387	0.240904	2.4857	0.790649	1391.4	31.1083	1397.36	23.8651	1406.44	36.8605	1406.44	36.8605	98.9301
UPPER HICKORY-66 <>	26.4353	11708.5	0.923767	11.1832	3.14212	2.85629	6.11378	0.231668	5.24456	0.857826	1343.24	63.5937	1370.47	46.0118	1413.15	60.1249	1413.15	60.1249	95.0526
UPPER HICKORY-61 <>	112.853	83709.9	1.80374	11.1693	0.976331	3.05899	1.51745	0.247802	1.16166	0.76553	1427.13	14.8715	1422.48	11.6125	1415.52	18.6718	1415.52	18.6718	100.82
UPPER HICKORY-108 <>	58.9148	27306.1	1.12759	11.1595	1.45663	2.87117	4.21482	0.232383	3.95512	0.938383	1346.97	48.0777	1374.38	31.7517	1417.2	27.8517	1417.2	27.8517	95.0447
UPPER HICKORY-14 <>	164.464	117744	1.16123	11.1508	0.322022	3.04611	1.62731	0.246348	1.59513	0.980225	1419.61	20.3248	1419.26	12.4403	1418.71	6.1557	1418.71	6.1557	100.064
UPPER HICKORY-1 <>	242.03	3434.27	1.03177	11.0783	3.13273	2.77252	6.90468	0.222764	6.1531	0.891149	1296.46	72.2658	1348.17	51.5691	1431.16	59.7975	1431.16	59.7975	90.5881
UPPER HICKORY-4 <>	57.5489	26003.7	1.04211	11.0564	3.32353	2.98646	4.937	0.23948	3.65076	0.73947	1383.99	45.4715	1404.18	37.5716	1434.93	63.4092	1434.93	63.4092	96.4502
UPPER HICKORY-91 <>	91.0409	2019.43	0.700873	11.0454	3.89379	2.65769	8.1231	0.212904	7.12904	0.877625	1244.27	80.6731	1316.78	60.0004	1436.83	74.2789	1436.83	74.2789	86.598
UPPER HICKORY-41 <>	105.855	22320.4	1.52184	11.0395	1.0002	2.79498	2.7674	0.223782	2.58033	0.932403	1301.83	30.4171	1354.19	20.6981	1437.86	19.0704	1437.86	19.0704	90.5395
UPPER HICKORY-5 <>	212.452	21726	1.04815	10.9659	0.566581	3.07024	1.57757	0.244183	1.47232	0.933281	1408.41	18.6274	1425.29	12.0835	1450.59	10.7841	1450.59	10.7841	97.092
Big Saline sandstone, sample 3 (Middle Pennsylvanian)
PennSS-Spot 192	292.162	113498	1.63854	18.6684	1.62339	0.416505	2.67104	0.056393	2.12109	0.794108	353.652	7.29925	353.549	7.97482	352.891	36.6793	353.652	7.29925	100.2
PennSS-Spot 232	484.942	66215.3	1.90214	14.8913	2.68104	0.586396	3.44434	0.063332	2.16229	0.62778	395.858	8.30207	468.563	12.9282	842.545	55.8062	395.858	8.30207	46.9
PennSS-Spot 290	139.987	75635.6	1.78547	17.9601	1.94249	0.490554	2.66382	0.0638989	1.82283	0.68429	399.294	7.0576	405.288	8.90196	439.571	43.2486	399.294	7.0576	90.8
PennSS-Spot 131	164.635	129477	1.8934	18.0567	1.96544	0.511395	2.78777	0.066972	1.97704	0.709186	417.887	7.99972	419.387	9.57806	427.622	43.837	417.887	7.99972	97.7235
PennSS-Spot 103	82.0339	38975.9	2.07793	18.116	2.31154	0.512555	2.85681	0.0673445	1.67873	0.587624	420.137	6.82805	420.166	9.83	420.3	51.6321	420.137	6.82805	99.9613
PennSS-Spot 247	408.682	72015.4	8.80098	18.0695	1.45593	0.514951	2.17901	0.0674855	1.62123	0.744019	420.989	6.60709	421.773	7.52082	426.043	32.4751	420.989	6.60709	98.8136
PennSS-Spot 266	147.545	94028.5	1.22011	18.1097	1.8308	0.5139	2.54568	0.0674977	1.76879	0.694822	421.062	7.2097	421.068	8.77456	421.078	40.8732	421.062	7.2097	99.9962
PennSS-Spot 267	175.36	85474.2	1.87963	17.6297	2.16394	0.537974	2.83845	0.0687867	1.83689	0.647145	428.842	7.62104	437.088	10.0818	480.737	47.8353	428.842	7.62104	89.2051
PennSS-Spot 186	106.51	32439.9	1.67027	17.2513	2.84136	0.552289	3.23365	0.0691016	1.54376	0.477405	430.741	6.43232	446.495	11.6825	528.516	62.2954	430.741	6.43232	81.5
PennSS-Spot 140	134.447	36684.3	2.80798	17.7191	1.73351	0.538265	2.83124	0.069173	2.23849	0.790641	431.171	9.33605	437.28	10.0597	469.569	38.3983	431.171	9.33605	91.8227
PennSS-Spot 109	200.972	97586.7	1.52716	18.0577	1.35017	0.53913	2.4623	0.0706081	2.05913	0.836259	439.818	8.75437	437.85	8.75791	427.496	30.1086	439.818	8.75437	102.882
PennSS-Spot 168	231.738	26410.7	2.03561	17.6344	1.62816	0.57054	2.60819	0.0729701	2.03759	0.781225	454.025	8.93289	458.363	9.62099	480.15	35.9779	454.025	8.93289	94.559
PennSS-Spot 97	102.972	48365.4	1.53276	17.4775	1.99461	0.576015	3.0424	0.0730148	2.29734	0.755106	454.293	10.0774	461.897	11.2911	499.909	43.9283	454.293	10.0774	90.8753
PennSS-Spot 104	191.658	57839.5	1.42434	17.4382	1.99462	0.578123	2.59284	0.0731175	1.6566	0.638912	454.911	7.2763	463.255	9.64493	504.817	43.9127	454.911	7.2763	90.1139
PennSS-Spot 1	179.72	79126.4	1.94134	17.9139	2.174	0.56714	3.08138	0.0736847	2.18372	0.708683	458.317	9.66089	456.163	11.3234	445.304	48.3367	458.317	9.66089	102.922
PennSS-Spot 233	283.882	163947	2.90706	17.6378	1.57491	0.589005	2.55601	0.0753464	2.01318	0.787623	468.286	9.09315	470.232	9.62054	479.72	34.8033	468.286	9.09315	97.6166
PennSS-Spot 184	164.217	60670.5	1.23888	17.7206	1.96929	0.592938	2.96851	0.0762056	2.22125	0.748271	473.434	10.1393	472.742	11.2201	469.382	43.6108	473.434	10.1393	100.863
PennSS-Spot 145	193.812	30949.4	2.1521	17.5406	1.53461	0.622467	2.41766	0.0791881	1.86817	0.772716	491.275	8.83684	491.392	9.41842	491.96	33.8412	491.275	8.83684	99.8608
PennSS-Spot 254	241.856	75627.2	0.439275	17.5786	1.94417	0.629372	2.82741	0.0802399	2.05291	0.726076	497.554	9.83012	495.705	11.0898	487.177	42.9311	497.554	9.83012	102.13
PennSS-Spot 111	48.0166	32116	2.93644	17.5474	2.73631	0.652554	3.48842	0.0830476	2.16372	0.620257	514.288	10.6954	510.049	13.9877	491.071	60.3595	514.288	10.6954	104.728
PennSS-Spot 7	135.454	34807	4.38563	17.2165	1.90506	0.666174	2.81086	0.0831823	2.0668	0.735292	515.09	10.2317	518.383	11.4118	532.946	41.7301	515.09	10.2317	96.6495
PennSS-Spot 45	117.965	130837	2.14443	17.3368	2.0908	0.661703	2.94178	0.0832015	2.06945	0.703469	515.204	10.247	515.655	11.8951	517.636	45.895	515.204	10.247	99.53
PennSS-Spot 235	40.2237	30373.6	3.13608	17.2417	2.92354	0.670214	3.67099	0.0838093	2.22015	0.604782	518.82	11.0673	520.843	14.9584	529.744	64.0685	518.82	11.0673	97.9378
PennSS-Spot 218	494.214	148468	2.85999	17.1548	1.58747	0.6825	2.64262	0.0849155	2.11267	0.799461	525.397	10.6596	528.284	10.885	540.783	34.6972	525.397	10.6596	97.1547
PennSS-Spot 217	98.9003	57697.8	2.7149	17.0361	1.95419	0.697905	2.7992	0.0862314	2.00417	0.715979	533.211	10.2564	537.539	11.6833	555.963	42.6175	533.211	10.2564	95.9076
PennSS-Spot 282	382.31	232775	5.27692	16.8103	1.40542	0.70908	2.22747	0.0864509	1.72813	0.775825	534.513	8.86448	544.2	9.38398	584.999	30.5032	534.513	8.86448	91.3699
PennSS-Spot 264	545.64	116217	16.9817	16.7512	1.29385	0.722926	2.39974	0.0878294	2.02106	0.842201	542.687	10.5191	552.393	10.2244	592.591	28.0496	542.687	10.5191	91.5787
PennSS-Spot 147	339.592	152835	1.49677	17.0616	1.44897	0.714471	2.50132	0.0884106	2.03889	0.815127	546.13	10.6764	547.398	10.5845	552.672	31.624	546.13	10.6764	98.8163
PennSS-Spot 120	111.274	110219	1.77902	16.9065	1.84522	0.721795	2.45623	0.0885046	1.62118	0.660027	546.687	8.49737	551.726	10.4555	572.573	40.1172	546.687	8.49737	95.479
PennSS-Spot 277	81.7142	216442	0.926625	16.0469	2.73528	0.768281	3.9009	0.0894151	2.78124	0.712973	552.077	14.7155	578.776	17.211	685.033	58.4013	552.077	14.7155	80.5914
PennSS-Spot 190	155.237	107602	0.577662	16.8196	2.12866	0.734392	2.94336	0.0895865	2.03277	0.690631	553.091	10.7743	559.128	12.6554	583.759	46.2285	553.091	10.7743	94.7465
PennSS-Spot 135	107.598	43291.8	0.810109	17.0831	1.9958	0.741038	3.03876	0.0918132	2.29147	0.754082	566.252	12.422	563.011	13.1336	549.927	43.5887	566.252	12.422	102.969
PennSS-Spot 311	596.083	68859.6	5.80349	16.946	1.25164	0.747977	2.04927	0.0919293	1.62262	0.791804	566.937	8.80631	567.05	8.90414	567.523	27.2399	566.937	8.80631	99.8967
PennSS-Spot 151	246.8	45582.7	4.44227	16.6809	1.48255	0.769942	2.68874	0.0931484	2.24307	0.834245	574.13	12.3213	579.729	11.8767	601.71	32.0901	574.13	12.3213	95.4164
PennSS-Spot 295	177.899	50287	2.66439	16.8046	1.80228	0.779621	2.86362	0.0950191	2.22534	0.777106	585.153	12.4481	585.267	12.7387	585.732	39.1182	585.153	12.4481	99.9011
PennSS-Spot 198	812.194	240584	4.93282	16.3883	1.27782	0.805678	2.23453	0.0957625	1.83311	0.820355	589.528	10.3273	600.027	10.124	639.924	27.4828	589.528	10.3273	92.1246
PennSS-Spot 210	162.875	50170	2.27821	16.6337	2.09739	0.794746	3.06844	0.0958774	2.23971	0.729917	590.203	12.6318	593.861	13.7975	607.837	45.3619	590.203	12.6318	97.099
PennSS-Spot 209	163.327	75689.6	2.48354	16.5805	1.66416	0.825212	2.31769	0.0992343	1.61315	0.696018	609.92	9.38783	610.952	10.6403	614.759	35.9513	609.92	9.38783	99.2128
PennSS-Spot 106	35.2591	46165.8	0.990642	16.3673	3.27923	0.836458	3.87833	0.0992933	2.07077	0.533933	610.266	12.0575	617.189	17.9384	642.684	70.5328	610.266	12.0575	94.9558
PennSS-Spot 121	187.804	55371.5	2.15499	16.5684	1.70123	0.827989	2.36925	0.0994955	1.64899	0.695998	611.452	9.61939	612.496	10.897	616.338	36.7459	611.452	9.61939	99.2072
PennSS-Spot 242	80.9983	71269.5	1.21381	16.2892	2.25312	0.845423	3.15906	0.0998784	2.21431	0.700937	613.696	12.9623	622.134	14.6959	652.954	48.379	613.696	12.9623	93.9877
PennSS-Spot 164	199.392	127320	1.27598	16.181	1.60898	0.863017	2.88553	0.10128	2.39531	0.830109	621.904	14.2005	631.768	13.5733	667.248	34.4508	621.904	14.2005	93.2044
PennSS-Spot 122	206.629	124155	3.64458	16.4336	1.78692	0.851305	2.25115	0.101465	1.36916	0.608204	622.989	8.13053	625.365	10.5113	633.987	38.485	622.989	8.13053	98.2654
PennSS-Spot 180	85.9478	121914	2.04787	16.4498	1.60057	0.850733	2.51609	0.101497	1.94136	0.771579	623.173	11.5317	625.051	11.7442	631.875	34.4847	623.173	11.5317	98.6228
PennSS-Spot 93	107.364	37679.1	1.33949	16.2667	1.41268	0.866855	2.33201	0.102269	1.85543	0.795636	627.692	11.0974	633.858	10.9955	655.93	30.3236	627.692	11.0974	95.695
PennSS-Spot 283	205.381	173369	0.352606	16.0542	1.64093	0.880802	2.28134	0.102557	1.58488	0.694715	629.377	9.50341	641.416	10.8485	684.068	35.023	629.377	9.50341	92.0049
PennSS-Spot 125	42.0729	24412.9	2.04555	16.4826	2.85008	0.885578	3.62532	0.105864	2.24054	0.618025	648.686	13.8267	643.991	17.2902	627.539	61.4165	648.686	13.8267	103.37
PennSS-Spot 159	300.445	158296	7.06707	16.2692	1.48261	0.913955	2.62817	0.107842	2.17006	0.825691	660.204	13.6176	659.158	12.7438	655.601	31.8155	660.204	13.6176	100.702
PennSS-Spot 307	181.309	47374.8	0.915105	15.6924	1.38434	1.02064	2.29603	0.116161	1.83177	0.797797	708.432	12.2892	714.235	11.7764	732.536	29.3046	708.432	12.2892	96.7095
PennSS-Spot 189	120.421	121869	3.62302	14.6708	2.16779	1.15349	2.78706	0.122734	1.75169	0.628507	746.282	12.3442	778.889	15.1593	873.482	44.9085	746.282	12.3442	85.4376
PennSS-Spot 130	235.477	58932.3	5.77263	15.6067	1.6399	1.09939	2.89209	0.124441	2.38221	0.823697	756.073	16.9952	753.057	15.3792	744.088	34.6532	756.073	16.9952	101.611
PennSS-Spot 158	205.361	444549	1.54998	15.2059	1.38737	1.16492	2.51003	0.128472	2.09176	0.83336	779.141	15.3514	784.267	13.7148	798.856	29.0866	779.141	15.3514	97.5322
PennSS-Spot 105	219.726	65181.1	1.25851	15.2813	1.74454	1.18492	2.4361	0.131325	1.70034	0.697976	795.421	12.7238	793.603	13.4154	788.481	36.6302	795.421	12.7238	100.88
PennSS-Spot 187	18.3194	31787	1.62147	14.584	2.73813	1.44118	3.32649	0.152438	1.88896	0.567854	914.613	16.1071	906.21	19.943	885.781	56.6038	885.781	56.6038	103.255
PennSS-Spot 16	107.647	61399	2.83769	14.5335	1.51419	1.44198	2.29733	0.151994	1.7277	0.752048	912.132	14.6948	906.542	13.7752	892.954	31.2849	892.954	31.2849	102.148
PennSS-Spot 251	50.5086	43784.3	2.39782	14.4381	2.50443	1.45901	2.91423	0.15278	1.49015	0.511336	916.526	12.7311	913.6	17.5588	906.518	51.5981	906.518	51.5981	101.104
PennSS-Spot 279	42.5059	88734.6	3.18716	14.3853	1.99937	1.43168	2.89371	0.149369	2.0919	0.722914	897.427	17.5252	902.25	17.3008	914.059	41.1489	914.059	41.1489	98.1804
PennSS-Spot 177	100.019	38916.4	2.23959	14.3814	1.78968	1.47509	2.57424	0.153857	1.85035	0.718793	922.551	15.9052	920.217	15.5791	914.646	36.8333	914.646	36.8333	100.864
PennSS-Spot 25	118.573	105584	2.86969	14.3278	1.52308	1.46217	2.50884	0.151941	1.99362	0.794637	911.837	16.9515	914.902	15.1291	922.323	31.3033	922.323	31.3033	98.8631
PennSS-Spot 117	144.15	73041.1	2.19031	14.3021	1.97237	1.46076	2.87981	0.151522	2.09835	0.728642	909.491	17.7993	914.321	17.3599	926.013	40.5092	926.013	40.5092	98.2158
PennSS-Spot 76	155.539	64902	3.66273	14.2844	1.42948	1.52698	2.4025	0.158195	1.93096	0.803727	946.74	17.0021	941.284	14.742	928.561	29.3526	928.561	29.3526	101.958
PennSS-Spot 47	150.475	217692	1.25581	14.1487	1.7588	1.5807	3.08965	0.162204	2.54019	0.822161	969.016	22.8542	962.644	19.2178	948.138	36.0172	948.138	36.0172	102.202
PennSS-Spot 102	113.523	104965	2.00111	14.1194	1.14196	1.51025	2.30949	0.154655	2.0074	0.869198	927.007	17.3327	934.542	14.1093	952.37	23.344	952.37	23.344	97.3369
PennSS-Spot 31	215.91	106633	3.46486	14.0682	1.03409	1.60785	1.84382	0.164053	1.52654	0.827925	979.262	13.8688	973.272	11.5433	959.756	21.1502	959.756	21.1502	102.032
PennSS-Spot 293	441.048	205219	3.84164	13.9675	1.25384	1.60228	2.28533	0.162314	1.91065	0.836052	969.626	17.2002	971.1	14.2887	974.432	25.5447	974.432	25.5447	99.5068
PennSS-Spot 194	25.3255	28381.6	1.64909	13.9381	1.98434	1.59663	3.02061	0.161402	2.27738	0.753948	964.561	20.4024	968.893	18.8611	978.712	40.4337	978.712	40.4337	98.5541
PennSS-Spot 163	48.3955	61495.8	0.772267	13.919	1.78884	1.61272	2.8194	0.162805	2.17924	0.772943	972.344	19.6691	975.165	17.6725	981.543	36.4234	981.543	36.4234	99.0627
PennSS-Spot 157	104.017	30554.4	2.5638	13.9034	1.46236	1.57224	2.40704	0.158541	1.91189	0.794292	948.663	16.866	959.313	14.94	983.798	29.7534	983.798	29.7534	96.4286
PennSS-Spot 196	49.6016	28682.5	3.2798	13.8981	1.80066	1.60718	2.63123	0.162002	1.91859	0.729161	967.891	17.2431	973.012	16.471	984.587	36.6384	984.587	36.6384	98.3043
PennSS-Spot 84	33.1238	109846	3.92852	13.8868	2.20665	1.54822	3.19636	0.155932	2.31245	0.723463	934.128	20.1092	949.785	19.7213	986.227	44.8927	986.227	44.8927	94.7173
PennSS-Spot 43	123.642	139132	3.35541	13.8779	1.3761	1.70116	2.76713	0.171225	2.4007	0.867578	1018.86	22.6249	1008.97	17.697	987.549	28.0007	987.549	28.0007	103.17
PennSS-Spot 182	76.1079	46137.7	5.10487	13.8584	1.90617	1.64812	2.65252	0.165653	1.84455	0.695397	988.114	16.8982	988.83	16.764	990.437	38.7519	990.437	38.7519	99.7655
PennSS-Spot 37	95.6844	228137	3.62728	13.8552	1.87378	1.58067	2.6811	0.158837	1.91761	0.715233	950.312	16.9437	962.634	16.6759	990.905	38.1095	990.905	38.1095	95.9035
PennSS-Spot 23	113.473	113564	7.21503	13.8401	1.74086	1.62677	2.77626	0.163292	2.16265	0.778978	975.044	19.5696	980.61	17.4597	993.106	35.3937	993.106	35.3937	98.1812
PennSS-Spot 160	161.319	105871	6.05399	13.8106	1.63507	1.66506	2.61207	0.166779	2.03702	0.779848	994.338	18.7701	995.307	16.5721	997.423	33.2016	997.423	33.2016	99.6907
PennSS-Spot 174	75.8046	81936.8	1.94553	13.8086	1.32577	1.59208	1.80221	0.159446	1.22078	0.677378	953.698	10.8223	967.114	11.2401	997.713	26.9206	997.713	26.9206	95.5884
PennSS-Spot 11	29.6245	68314.4	0.352018	13.7993	2.09597	1.66589	3.19308	0.166725	2.40887	0.754405	994.042	22.1905	995.621	20.2629	999.084	42.5757	999.084	42.5757	99.4953
PennSS-Spot 123	20.863	52404.9	1.54196	13.7837	2.91006	1.65764	3.38947	0.165713	1.73782	0.512712	988.446	15.9253	992.476	21.4694	1001.38	59.1147	1001.38	59.1147	98.7088
PennSS-Spot 255	61.559	42554.4	1.93193	13.7715	1.69728	1.49907	2.43326	0.149728	1.74356	0.716554	899.436	14.6374	930.01	14.8216	1003.18	34.4546	1003.18	34.4546	89.6583
PennSS-Spot 100	41.6619	35156.1	1.21453	13.7668	2.26498	1.60222	2.90075	0.159976	1.81224	0.624749	956.643	16.1117	971.077	18.1369	1003.86	45.996	1003.86	45.996	95.2963
PennSS-Spot 221	208.197	2.94281e+07	1.90656	13.7611	1.7305	1.60114	2.65744	0.159801	2.01676	0.758912	955.672	17.9131	970.654	16.611	1004.71	35.117	1004.71	35.117	95.1195
PennSS-Spot 276	108.21	123437	4.01365	13.7503	1.86504	1.75974	2.87118	0.175493	2.18295	0.760299	1042.3	21.0089	1030.75	18.5917	1006.3	37.8417	1006.3	37.8417	103.578
PennSS-Spot 72	23.8799	13292.6	2.32366	13.7459	2.59934	1.65028	3.16907	0.164524	1.81286	0.572047	981.867	16.5106	989.659	20.0394	1006.95	52.7601	1006.95	52.7601	97.5086
PennSS-Spot 170	90.1575	67620.9	1.80171	13.7197	1.0322	1.74067	1.88422	0.173205	1.57634	0.8366	1029.75	15.0022	1023.71	12.1518	1010.82	20.9278	1010.82	20.9278	101.872
PennSS-Spot 52	116.696	99835.5	3.35995	13.7095	1.44453	1.77259	2.64741	0.17625	2.21859	0.838021	1046.45	21.4302	1035.47	17.1876	1012.33	29.2628	1012.33	29.2628	103.371
PennSS-Spot 132	217.423	245736	3.34106	13.7076	1.42954	1.51525	2.20271	0.150642	1.67581	0.760796	904.559	14.1433	936.561	13.4746	1012.6	28.968	1012.6	28.968	89.3301
PennSS-Spot 61	130.211	155995	3.97486	13.6995	1.43105	1.66413	2.48754	0.165346	2.03469	0.817952	986.416	18.6104	994.953	15.7786	1013.8	28.9832	1013.8	28.9832	97.2991
PennSS-Spot 220	427.006	301772	5.82946	13.6976	1.47775	1.67898	2.54591	0.166797	2.07313	0.814301	994.44	19.1047	1000.6	16.2026	1014.09	29.933	1014.09	29.933	98.0624
PennSS-Spot 91	78.0541	151035	2.01733	13.6869	1.8136	1.61499	2.76105	0.160314	2.08189	0.754021	958.52	18.5427	976.046	17.3159	1015.68	36.7659	1015.68	36.7659	94.3726
PennSS-Spot 226	122.396	90005.4	4.67978	13.6831	1.57061	1.68214	2.88305	0.166934	2.41768	0.838583	995.195	22.2955	1001.79	18.3616	1016.24	31.8334	1016.24	31.8334	97.9293
PennSS-Spot 243	174.78	105370	0.933801	13.6759	1.38566	1.65968	2.61399	0.164619	2.21651	0.847939	982.393	20.1969	993.255	16.5641	1017.3	28.0875	1017.3	28.0875	96.5684
PennSS-Spot 77	104.539	196554	2.83459	13.673	1.46084	1.71101	2.53778	0.169674	2.07515	0.817704	1010.31	19.4053	1012.66	16.2646	1017.73	29.5966	1017.73	29.5966	99.2716
PennSS-Spot 40	166.156	114542	1.23253	13.665	1.56836	1.73602	2.92767	0.172053	2.47215	0.844407	1023.41	23.3943	1021.99	18.8642	1018.91	31.7652	1018.91	31.7652	100.442
PennSS-Spot 286	37.0578	39742.8	2.06243	13.6594	2.38825	1.69467	3.24546	0.167887	2.19756	0.677118	1000.46	20.3646	1006.53	20.7275	1019.74	48.3815	1019.74	48.3815	98.1085
PennSS-Spot 146	66.5869	37441.4	4.36071	13.656	2.05789	1.62385	3.10543	0.16083	2.32568	0.748907	961.39	20.7716	979.481	19.517	1020.24	41.6871	1020.24	41.6871	94.2314
PennSS-Spot 216	127.993	181636	2.95389	13.6536	1.35962	1.62772	2.55837	0.161185	2.16718	0.847095	963.361	19.3927	980.978	16.0927	1020.6	27.5452	1020.6	27.5452	94.3915
PennSS-Spot 229	96.1191	79446.8	1.28025	13.6323	1.70341	1.65849	2.66923	0.163976	2.05504	0.7699	978.836	18.6628	992.799	16.9096	1023.76	34.4893	1023.76	34.4893	95.6115
PennSS-Spot 250	194.575	50851.4	10.6545	13.6255	1.42629	1.64237	2.21401	0.162301	1.69338	0.764848	969.552	15.2432	986.622	13.9738	1024.77	28.8638	1024.77	28.8638	94.6117
PennSS-Spot 89	179.53	562258	2.81046	13.6203	1.52879	1.73177	2.52493	0.17107	2.0095	0.795862	1018.01	18.9234	1020.41	16.2541	1025.55	30.9416	1025.55	30.9416	99.2648
PennSS-Spot 237	149.942	56748.4	3.07786	13.6128	1.3487	1.73491	2.36061	0.171287	1.93739	0.820717	1019.2	18.264	1021.58	15.2062	1026.66	27.2992	1026.66	27.2992	99.2732
PennSS-Spot 241	85.8369	42710.5	5.15506	13.6093	1.90452	1.78672	3.08377	0.176356	2.42538	0.786498	1047.04	23.4397	1040.63	20.0785	1027.18	38.5206	1027.18	38.5206	101.933
PennSS-Spot 213	314.748	59878.9	4.42391	13.5975	0.800658	1.77163	1.94147	0.174715	1.76868	0.911003	1038.04	16.9577	1035.12	12.6014	1028.93	16.2073	1028.93	16.2073	100.885
PennSS-Spot 59	417.211	113500	2.597	13.5876	1.12899	1.71433	1.97007	0.16894	1.61448	0.819506	1006.27	15.0416	1013.9	12.6347	1030.41	22.8416	1030.41	22.8416	97.6572
PennSS-Spot 90	60.7687	210673	3.61724	13.5867	1.57832	1.72001	2.50074	0.16949	1.93975	0.775668	1009.3	18.1223	1016.03	16.0582	1030.53	31.9249	1030.53	31.9249	97.9399
PennSS-Spot 69	54.9423	193157	2.44853	13.5727	1.62695	1.66785	2.5025	0.16418	1.90146	0.759823	979.964	17.2864	996.367	15.8867	1032.63	32.8977	1032.63	32.8977	94.8997
PennSS-Spot 193	46.6903	205453	1.19025	13.5656	2.24986	1.78728	3.24929	0.175845	2.34435	0.721498	1044.23	22.6007	1040.84	21.1589	1033.69	45.4595	1033.69	45.4595	101.02
PennSS-Spot 137	91.6728	50107.6	0.738001	13.5346	1.52034	1.7328	2.41246	0.170095	1.87311	0.776429	1012.63	17.553	1020.79	15.5333	1038.31	30.7172	1038.31	30.7172	97.5271
PennSS-Spot 92	101.892	43163.8	7.08266	13.5106	1.71099	1.67814	2.47488	0.164437	1.78816	0.722527	981.387	16.2783	1000.28	15.7475	1041.89	34.5478	1041.89	34.5478	94.1932
PennSS-Spot 208	53.8778	30760.8	2.7762	13.5036	1.86069	1.7685	3.02852	0.173201	2.38952	0.789004	1029.73	22.741	1033.97	19.646	1042.93	37.5467	1042.93	37.5467	98.7336
PennSS-Spot 83	211.169	178957	1.9883	13.5005	1.23908	1.76021	2.26931	0.172351	1.90116	0.837773	1025.05	18.0175	1030.92	14.6952	1043.39	25.0182	1043.39	25.0182	98.2423
PennSS-Spot 179	60.336	235390	1.22318	13.5001	1.62527	1.71868	2.72506	0.16828	2.18733	0.802674	1002.63	20.3105	1015.53	17.4939	1043.45	32.8101	1043.45	32.8101	96.088
PennSS-Spot 230	95.9412	89326.3	1.72563	13.495	1.49255	1.88177	2.51524	0.184178	2.02453	0.804906	1089.76	20.2985	1074.69	16.6784	1044.22	30.1293	1044.22	30.1293	104.361
PennSS-Spot 252	141.077	185157	3.81991	13.4931	1.69174	1.76984	2.65064	0.173198	2.04056	0.769839	1029.71	19.4196	1034.46	17.1989	1044.5	34.1279	1044.5	34.1279	98.5836
PennSS-Spot 51	98.9914	215581	5.74414	13.4846	2.00228	1.86064	3.27431	0.18197	2.59075	0.791236	1077.73	25.7123	1067.21	21.6279	1045.8	40.3896	1045.8	40.3896	103.053
PennSS-Spot 304	55.9493	25569.5	2.48702	13.4833	2.1381	1.80443	2.83958	0.176455	1.86863	0.658065	1047.58	18.0677	1047.06	18.5536	1046	43.1383	1046	43.1383	100.151
PennSS-Spot 27	264.909	74521.5	2.55629	13.4693	1.46921	1.83336	2.46569	0.179098	1.98016	0.803086	1062.05	19.3892	1057.49	16.2013	1048.1	29.6228	1048.1	29.6228	101.331
PennSS-Spot 41	64.0635	32124.9	3.07061	13.4455	1.6571	1.80947	2.80896	0.176453	2.2681	0.807452	1047.57	21.9299	1048.89	18.3717	1051.66	33.3957	1051.66	33.3957	99.611
PennSS-Spot 10	110.149	95996.1	1.93662	13.4423	1.60507	1.77811	2.69488	0.173353	2.16475	0.803281	1030.56	20.6172	1037.49	17.5155	1052.14	32.3606	1052.14	32.3606	97.9489
PennSS-Spot 154	108.099	49724.6	1.64961	13.4374	1.61842	1.4865	2.43833	0.144871	1.82378	0.747963	872.148	14.8771	924.89	14.8023	1052.87	32.6236	1052.87	32.6236	82.8354
PennSS-Spot 166	1016.11	107417	15.2841	13.4373	1.22531	1.78767	2.12988	0.174221	1.74213	0.817945	1035.32	16.6628	1040.98	13.8694	1052.89	24.6879	1052.89	24.6879	98.3321
PennSS-Spot 303	29.471	45123.2	2.49302	13.4319	2.8042	1.57936	4.12471	0.153858	3.02484	0.733347	922.554	26.0011	962.119	25.6499	1053.69	56.4989	1053.69	56.4989	87.5544
PennSS-Spot 248	29.6696	19690.5	1.30045	13.414	2.55911	1.7893	3.21758	0.174077	1.95033	0.606148	1034.53	18.6411	1041.57	20.9609	1056.38	51.5382	1056.38	51.5382	97.9318
PennSS-Spot 148	490.459	77873.3	4.46931	13.3945	1.54935	1.74576	2.48528	0.169593	1.94323	0.781894	1009.87	18.1642	1025.59	16.0459	1059.32	31.1851	1059.32	31.1851	95.3317
PennSS-Spot 70	155.202	106000	3.03005	13.3882	1.552	1.75724	2.38503	0.170628	1.81098	0.759312	1015.57	17.0163	1029.83	15.4352	1060.26	31.2345	1060.26	31.2345	95.7849
PennSS-Spot 112	61.7132	28526.2	3.40145	13.363	1.76151	1.83287	2.57087	0.177638	1.87256	0.728374	1054.06	18.2087	1057.31	16.891	1064.04	35.45	1064.04	35.45	99.0615
PennSS-Spot 81	169.269	114156	3.76504	13.3598	1.20691	1.75841	2.27592	0.170381	1.92955	0.847812	1014.21	18.1079	1030.26	14.7326	1064.53	24.2899	1064.53	24.2899	95.2729
PennSS-Spot 48	215.745	94989.9	2.53449	13.3553	1.27948	1.79714	2.63382	0.174074	2.30216	0.874076	1034.52	22.0036	1044.42	17.184	1065.21	25.7303	1065.21	25.7303	97.1184
PennSS-Spot 127	65.3604	45518.9	1.15745	13.3421	1.7285	1.83029	2.5277	0.17711	1.84432	0.729646	1051.17	17.8889	1056.38	16.599	1067.2	34.7691	1067.2	34.7691	98.4977
PennSS-Spot 82	81.737	145742	2.65825	13.3396	1.61745	1.80871	2.5693	0.174988	1.99628	0.776976	1039.54	19.1654	1048.61	16.8014	1067.58	32.5269	1067.58	32.5269	97.3731
PennSS-Spot 26	97.5384	34334.8	1.05465	13.3377	1.53422	1.84412	2.70844	0.178389	2.232	0.824089	1058.17	21.7818	1061.33	17.8334	1067.86	30.8508	1067.86	30.8508	99.0924
PennSS-Spot 238	48.6271	47412.3	2.65994	13.3356	2.01433	1.70601	2.82937	0.165004	1.98691	0.702245	984.525	18.1411	1010.79	18.1141	1068.17	40.4924	1068.17	40.4924	92.169
PennSS-Spot 149	118.938	55387.5	1.63574	13.3089	1.39066	1.90367	2.60526	0.183752	2.20305	0.845618	1087.44	22.0453	1082.38	17.3447	1072.21	27.9476	1072.21	27.9476	101.42
PennSS-Spot 269	175.521	154417	2.54441	13.291	1.45713	1.79814	2.27521	0.173332	1.74738	0.768008	1030.45	16.6404	1044.78	14.8469	1074.91	29.2507	1074.91	29.2507	95.8637
PennSS-Spot 253	150.599	74423.5	2.47023	13.2837	1.39676	1.76911	2.13739	0.17044	1.61786	0.756936	1014.53	15.1874	1034.19	13.8661	1076.02	28.0339	1076.02	28.0339	94.2859
PennSS-Spot 240	27.045	38128.4	1.08773	13.2834	3.17685	1.7713	3.90633	0.170647	2.27311	0.581904	1015.68	21.3606	1035	25.357	1076.06	63.8108	1076.06	63.8108	94.3882
PennSS-Spot 183	107.69	214163	1.38166	13.2793	1.54231	1.7234	2.54741	0.165981	2.02745	0.79589	989.931	18.6054	1017.29	16.3697	1076.68	30.9483	1076.68	30.9483	91.9426
PennSS-Spot 6	109.379	147358	2.92184	13.2743	1.78105	1.90129	3.33861	0.183045	2.82386	0.845819	1083.59	28.1657	1081.54	22.2189	1077.42	35.7533	1077.42	35.7533	100.572
PennSS-Spot 114	123.801	148930	2.96212	13.2575	1.54191	1.80923	2.61778	0.173962	2.11548	0.808121	1033.9	20.2082	1048.8	17.1202	1079.94	30.9211	1079.94	30.9211	95.737
PennSS-Spot 297	439.896	331430	3.4674	13.2567	1.19433	1.84653	2.51305	0.177538	2.21111	0.879851	1053.51	21.4905	1062.19	16.5543	1080.06	23.9527	1080.06	23.9527	97.5419
PennSS-Spot 223	65.0805	28068.7	3.02688	13.2416	1.62076	1.83685	2.58972	0.176407	2.01985	0.779949	1047.31	19.5252	1058.74	17.0279	1082.34	32.4922	1082.34	32.4922	96.7636
PennSS-Spot 263	171.982	68722.4	2.1445	13.2337	1.22172	1.90056	2.60063	0.182416	2.2958	0.882785	1080.16	22.8321	1081.28	17.3042	1083.54	24.4834	1083.54	24.4834	99.6879
PennSS-Spot 39	669.351	106912	2.65791	13.2314	1.2447	1.90173	2.64659	0.182496	2.33563	0.882505	1080.59	23.2369	1081.7	17.6138	1083.9	24.9423	1083.9	24.9423	99.6953
PennSS-Spot 126	159.939	116703	4.68064	13.2229	1.49903	1.89801	2.63027	0.182022	2.1613	0.821702	1078.01	21.4552	1080.39	17.4933	1085.19	30.037	1085.19	30.037	99.3382
PennSS-Spot 136	100.648	54207.6	2.10742	13.2198	1.70254	1.8721	2.83461	0.179495	2.26635	0.79953	1064.22	22.2333	1071.27	18.763	1085.68	34.1344	1085.68	34.1344	98.0233
PennSS-Spot 288	129.407	104553	3.02455	13.1986	1.57742	1.78502	2.78237	0.170872	2.29201	0.823763	1016.91	21.5625	1040.01	18.1094	1088.89	31.6099	1088.89	31.6099	93.3897
PennSS-Spot 298	146.867	233702	1.44303	13.1966	1.68474	1.87595	2.65424	0.179549	2.05101	0.772729	1064.51	20.1258	1072.63	17.5814	1089.21	33.7504	1089.21	33.7504	97.7323
PennSS-Spot 108	48.3032	45460.8	2.98853	13.1947	1.75733	1.81104	2.65945	0.17331	1.99611	0.750573	1030.32	19.0071	1049.45	17.399	1089.48	35.2112	1089.48	35.2112	94.5705
PennSS-Spot 49	59.8268	40556.7	2.4496	13.1782	1.67932	1.87723	2.94001	0.17942	2.41321	0.820815	1063.81	23.6656	1073.09	19.4794	1091.97	33.6221	1091.97	33.6221	97.4208
PennSS-Spot 150	136.972	129072	0.937301	13.1767	1.77177	1.76133	2.74358	0.168324	2.09478	0.763519	1002.87	19.4554	1031.34	17.7711	1092.2	35.4878	1092.2	35.4878	91.8211
PennSS-Spot 302	51.5413	124296	3.6933	13.168	1.84475	1.74795	2.77279	0.166934	2.07008	0.746571	995.198	19.09	1026.4	17.9107	1093.56	36.9246	1093.56	36.9246	91.0057
PennSS-Spot 71	41.0684	48630.4	2.31695	13.1525	1.73346	1.83301	2.80469	0.174853	2.20486	0.786133	1038.79	21.1539	1057.36	18.4281	1095.87	34.6823	1095.87	34.6823	94.7919
PennSS-Spot 234	52.4024	35444.7	1.58167	13.0891	2.36255	1.77714	3.08188	0.168706	1.97898	0.642134	1004.98	18.4156	1037.13	20.0275	1105.57	47.211	1105.57	47.211	90.901
PennSS-Spot 29	105.244	101919	2.85008	13.0774	1.61421	1.98391	2.49364	0.188166	1.90067	0.762208	1111.43	19.4039	1110.05	16.836	1107.36	32.2502	1107.36	32.2502	100.368
PennSS-Spot 257	120.406	144087	2.07848	13.0664	1.2458	1.8864	2.09119	0.178767	1.6796	0.803179	1060.23	16.4204	1076.32	13.878	1109.01	24.8701	1109.01	24.8701	95.6015
PennSS-Spot 18	113.038	74538.2	2.69846	13.0656	1.62804	2.05688	3.02381	0.194911	2.54812	0.842685	1147.93	26.7943	1134.58	20.6621	1109.13	32.5265	1109.13	32.5265	103.498
PennSS-Spot 32	228.607	59387.2	2.6194	13.0357	1.30958	1.99413	2.23092	0.188532	1.8061	0.809576	1113.42	18.4687	1113.52	15.0879	1113.71	26.1275	1113.71	26.1275	99.9741
PennSS-Spot 65	272.691	558528	1.91117	12.9819	1.17513	1.96925	1.72644	0.185412	1.26478	0.732591	1096.47	12.7527	1105.05	11.6266	1121.96	23.4324	1121.96	23.4324	97.7284
PennSS-Spot 15	354.446	65357.3	3.10877	12.9812	1.29807	2.01081	2.42826	0.189315	2.05218	0.845125	1117.66	21.0583	1119.16	16.4684	1122.08	25.8843	1122.08	25.8843	99.6062
PennSS-Spot 78	107.567	112885	2.6965	12.9764	1.69785	1.95902	2.51421	0.184371	1.85434	0.737544	1090.81	18.6086	1101.55	16.903	1122.83	33.8348	1122.83	33.8348	97.148
PennSS-Spot 88	319.217	128354	3.87076	12.9398	1.60346	2.05226	2.61823	0.192601	2.06979	0.790529	1135.45	21.5481	1133.05	17.8769	1128.47	31.9369	1128.47	31.9369	100.619
PennSS-Spot 222	175.454	77280.4	7.0935	12.9393	1.546	1.91022	2.29785	0.179264	1.69999	0.739821	1062.95	16.659	1084.66	15.3159	1128.55	30.7997	1128.55	30.7997	94.1874
PennSS-Spot 162	149.538	47299.2	2.14698	12.9214	1.6944	2.03957	2.58273	0.191138	1.94923	0.754718	1127.54	20.1636	1128.82	17.5986	1131.3	33.7234	1131.3	33.7234	99.6672
PennSS-Spot 249	52.0537	26405.3	2.81638	12.8892	1.95974	2.12173	2.81715	0.198341	2.0238	0.718384	1166.4	21.5933	1155.9	19.4441	1136.27	39.0107	1136.27	39.0107	102.652
PennSS-Spot 5	65.3281	40976.7	3.78765	12.8815	1.67113	2.01457	2.99013	0.188212	2.47955	0.829247	1111.68	25.319	1120.43	20.2924	1137.47	33.2522	1137.47	33.2522	97.7332
PennSS-Spot 173	74.4866	199077	2.60175	12.8544	1.99376	2.02334	3.0268	0.188634	2.27737	0.752402	1113.97	23.2984	1123.38	20.571	1141.64	39.6434	1141.64	39.6434	97.5764
PennSS-Spot 301	100.827	74154.4	3.21934	12.8436	1.4381	1.95438	2.55915	0.182051	2.11687	0.827175	1078.17	21.017	1099.95	17.1914	1143.32	28.6066	1143.32	28.6066	94.3018
PennSS-Spot 138	84.2532	53066.1	3.78599	12.82	1.41477	1.98791	2.27996	0.184835	1.78792	0.784189	1093.33	17.9802	1111.41	15.4035	1146.95	28.1076	1146.95	28.1076	95.3251
PennSS-Spot 33	80.4925	77704.5	3.55959	12.8169	1.59981	1.96123	2.38378	0.182309	1.7672	0.741345	1079.58	17.5664	1102.3	16.032	1147.44	31.783	1147.44	31.783	94.0855
PennSS-Spot 310	167.372	179376	1.33463	12.8149	1.15244	1.99792	2.26553	0.185692	1.95052	0.860955	1097.99	19.6921	1114.81	15.3317	1147.75	22.8983	1147.75	22.8983	95.6651
PennSS-Spot 305	212.844	56050.2	2.28804	12.7896	1.40778	2.09025	2.35992	0.19389	1.89403	0.802584	1142.41	19.8288	1145.61	16.2094	1151.64	27.9694	1151.64	27.9694	99.1984
PennSS-Spot 315	103.764	44164	2.31575	12.7873	1.54196	1.95082	2.50017	0.180923	1.96805	0.787166	1072.01	19.4369	1098.73	16.7847	1152.01	30.6125	1152.01	30.6125	93.0559
PennSS-Spot 300	117.547	66875.4	4.04785	12.7788	1.76316	2.04897	2.91457	0.189899	2.32078	0.796266	1120.83	23.8763	1131.95	19.8904	1153.32	34.9979	1153.32	34.9979	97.1825
PennSS-Spot 4	96.587	1.74101e+06	4.16666	12.7537	1.02593	2.06694	2.21965	0.191189	1.96833	0.886773	1127.81	20.3657	1137.92	15.1904	1157.22	20.3508	1157.22	20.3508	97.4588
PennSS-Spot 128	62.9782	45715.9	4.00577	12.7498	1.47049	1.96334	2.41928	0.18155	1.92108	0.794073	1075.44	19.0288	1103.03	16.2767	1157.84	29.1873	1157.84	29.1873	92.8834
PennSS-Spot 191	131.318	65775.6	3.06692	12.7454	1.42468	2.09907	2.50352	0.194035	2.05861	0.822288	1143.2	21.5654	1148.5	17.2194	1158.51	28.2757	1158.51	28.2757	98.6777
PennSS-Spot 124	84.6352	92546.7	3.34036	12.7337	1.53881	2.05696	2.39856	0.189967	1.83988	0.767078	1121.2	18.9345	1134.61	16.3891	1160.34	30.5248	1160.34	30.5248	96.6268
PennSS-Spot 207	242.064	151922	2.96878	12.6217	1.20397	2.19167	2.31386	0.200629	1.97596	0.853966	1178.7	21.2854	1178.4	16.1347	1177.87	23.8121	1177.87	23.8121	100.071
PennSS-Spot 64	153.004	103838	1.80875	12.6118	1.35626	2.11617	2.19189	0.193565	1.7219	0.785579	1140.66	18.0015	1154.09	15.115	1179.42	26.8186	1179.42	26.8186	96.7133
PennSS-Spot 19	54.9202	26649.1	1.61128	12.5942	1.8409	2.22947	2.72506	0.203643	2.00924	0.73732	1194.86	21.9142	1190.35	19.1041	1182.18	36.3694	1182.18	36.3694	101.073
PennSS-Spot 202	145.38	191504	5.14122	12.575	1.61218	2.18411	2.63132	0.199197	2.0796	0.790326	1171.01	22.2686	1175.99	18.329	1185.19	31.8685	1185.19	31.8685	98.8032
PennSS-Spot 181	236.737	168286	4.50386	12.5502	1.48269	2.13445	2.44807	0.194284	1.94799	0.795726	1144.54	20.4285	1160.03	16.9285	1189.09	29.2771	1189.09	29.2771	96.253
PennSS-Spot 44	229.988	44659.8	3.17552	12.5056	1.8665	1.87205	2.88211	0.169794	2.19607	0.761966	1010.97	20.5484	1071.26	19.0773	1196.09	36.8378	1196.09	36.8378	84.5235
PennSS-Spot 256	45.644	43602.9	3.45989	12.4478	1.89365	2.25844	2.94282	0.203892	2.25262	0.765462	1196.2	24.5936	1199.42	20.7135	1205.21	37.3165	1205.21	37.3165	99.2519
PennSS-Spot 142	152.935	185409	2.2786	12.3915	1.37433	2.12179	2.50454	0.190689	2.09379	0.835997	1125.11	21.6163	1155.92	17.2862	1214.14	27.0201	1214.14	27.0201	92.6673
PennSS-Spot 296	829.336	107887	2.28083	12.305	1.80665	2.3328	2.8788	0.20819	2.24132	0.77856	1219.16	24.897	1222.33	20.463	1227.91	35.4945	1227.91	35.4945	99.288
PennSS-Spot 167	27.2959	157526	5.0329	12.2903	1.69912	2.25861	2.64037	0.201327	2.02102	0.765432	1182.45	21.8339	1199.47	18.5845	1230.29	33.3345	1230.29	33.3345	96.1111
PennSS-Spot 306	242.736	163387	4.98195	12.1973	1.32877	2.3681	2.69891	0.209489	2.34914	0.870405	1226.1	26.2295	1233.03	19.2702	1245.16	26.0258	1245.16	26.0258	98.4693
PennSS-Spot 74	139.25	126406	1.94029	12.0708	1.05938	2.35276	2.18156	0.205974	1.90708	0.874178	1207.33	20.9972	1228.39	15.5456	1265.54	20.6896	1265.54	20.6896	95.4004
PennSS-Spot 55	189.293	41972.3	1.84556	12.0569	1.47438	2.12724	2.30432	0.186016	1.7709	0.768513	1099.76	17.905	1157.69	15.9171	1267.82	28.7687	1267.82	28.7687	86.7438
PennSS-Spot 215	86.744	125156	1.88922	11.9964	1.43518	2.45819	2.35034	0.213877	1.86128	0.791921	1249.44	21.1409	1259.83	16.9656	1277.6	27.9625	1277.6	27.9625	97.7957
PennSS-Spot 30	26.0453	40021.7	1.32586	11.9247	2.07278	2.55424	2.89117	0.220905	2.01554	0.697139	1286.66	23.5091	1287.65	21.0999	1289.28	40.3474	1289.28	40.3474	99.7965
PennSS-Spot 38	70.5935	74618.2	2.66019	11.7938	1.51848	2.60681	2.43535	0.222977	1.90399	0.781811	1297.59	22.3782	1302.56	17.874	1310.74	29.4657	1310.74	29.4657	98.9968
PennSS-Spot 205	149.404	215235	1.48657	11.7542	1.39111	2.59615	2.13996	0.22132	1.62611	0.75988	1288.84	18.9959	1299.55	15.6878	1317.26	26.9704	1317.26	26.9704	97.8431
PennSS-Spot 54	145.573	172373	3.3334	11.6909	1.47705	2.66792	2.7452	0.226213	2.31396	0.842913	1314.62	27.5188	1319.62	20.2775	1327.72	28.5949	1327.72	28.5949	99.0134
PennSS-Spot 22	34.9327	83688.6	2.81157	11.6793	2.25938	2.71702	3.19896	0.230149	2.26463	0.707927	1335.28	27.313	1333.12	23.7474	1329.63	43.7315	1329.63	43.7315	100.425
PennSS-Spot 98	114.562	121810	1.59175	11.6593	1.46843	2.51145	2.50867	0.212371	2.03399	0.810786	1241.44	22.9683	1275.35	18.2204	1332.95	28.4057	1332.95	28.4057	93.1347
PennSS-Spot 299	48.7936	91952.3	2.25964	11.5961	2.17408	2.51256	3.11282	0.211313	2.22779	0.71568	1235.81	25.0532	1275.67	22.6125	1343.46	41.9986	1343.46	41.9986	91.987
PennSS-Spot 309	90.2044	111656	1.80472	11.4165	1.34371	2.76948	2.58454	0.229314	2.20778	0.854226	1330.9	26.5488	1347.35	19.2833	1373.54	25.8469	1373.54	25.8469	96.8958
PennSS-Spot 14	32.3053	83874.3	2.07911	11.3779	1.46466	2.73417	2.80837	0.225624	2.39619	0.853232	1311.52	28.4362	1337.79	20.8822	1380.06	28.1485	1380.06	28.1485	95.0342
PennSS-Spot 8	433.31	246857	2.60612	11.3638	1.19293	2.83305	2.49617	0.233495	2.19267	0.878412	1352.79	26.7568	1364.33	18.7354	1382.44	22.9187	1382.44	22.9187	97.8553
PennSS-Spot 101	149.522	62692.2	3.30907	11.3611	1.73748	2.79993	2.93062	0.23071	2.36002	0.805297	1338.22	28.5198	1355.52	21.9295	1382.9	33.3791	1382.9	33.3791	96.7693
PennSS-Spot 53	84.2129	151091	2.52217	11.3416	1.39291	2.90906	2.14785	0.239292	1.63495	0.761204	1383.01	20.3507	1384.27	16.2312	1386.19	26.7472	1386.19	26.7472	99.7711
PennSS-Spot 287	51.808	107981	2.23889	11.2633	1.692	2.70851	2.70791	0.221255	2.11421	0.780754	1288.5	24.6919	1330.79	20.084	1399.49	32.4307	1399.49	32.4307	92.0695
PennSS-Spot 3	148.266	173641	1.91985	11.1672	1.18014	2.88789	2.56303	0.233897	2.27517	0.887687	1354.89	27.8023	1378.76	19.3331	1415.89	22.5686	1415.89	22.5686	95.6922
PennSS-Spot 85	50.2944	74867.4	3.2788	11.1651	1.4062	2.93747	2.13733	0.237867	1.60959	0.753086	1375.6	19.9387	1391.62	16.1918	1416.25	26.8907	1416.25	26.8907	97.1297
PennSS-Spot 153	466.6	58341.2	3.06976	11.1363	1.40818	2.96073	2.12625	0.239133	1.59309	0.749251	1382.19	19.819	1397.6	16.14	1421.18	26.9107	1421.18	26.9107	97.2565
PennSS-Spot 58	246.346	134190	6.46438	10.996	1.39407	3.13535	2.06694	0.250046	1.52604	0.738308	1438.71	19.6779	1441.41	15.9135	1445.37	26.554	1445.37	26.554	99.5395
PennSS-Spot 17	117.695	229643	2.08609	10.8157	1.08406	3.26527	2.11515	0.256138	1.81623	0.858675	1470.05	23.8741	1472.82	16.443	1476.79	20.5614	1476.79	20.5614	99.5438
PennSS-Spot 258	365.598	238808	2.63399	10.8134	1.48488	3.19826	2.33918	0.250828	1.80745	0.772686	1442.74	23.365	1456.74	18.0961	1477.2	28.163	1477.2	28.163	97.6676
PennSS-Spot 60	1006.44	156336	11.7329	10.8091	1.35207	3.03844	2.61525	0.238198	2.23863	0.85599	1377.32	27.762	1417.33	19.9819	1477.96	25.6411	1477.96	25.6411	93.191
PennSS-Spot 271	440.222	236236	2.03816	10.7756	1.28335	3.35065	2.48976	0.261861	2.13352	0.856918	1499.36	28.5415	1492.94	19.4722	1483.83	24.3187	1483.83	24.3187	101.046
PennSS-Spot 139	91.9396	220417	2.9643	10.7319	1.1044	3.14696	2.19508	0.244944	1.89702	0.864215	1412.35	24.0608	1444.25	16.9154	1491.53	20.9059	1491.53	20.9059	94.6915
PennSS-Spot 203	283.359	120229	3.51781	10.6402	1.17411	3.32861	1.84958	0.256869	1.42912	0.772677	1473.8	18.8283	1487.79	14.4426	1507.76	22.176	1507.76	22.176	97.7479
PennSS-Spot 68	162.511	138986	1.68802	10.6142	1.42008	3.33901	1.95694	0.257043	1.34647	0.688049	1474.69	17.7489	1490.22	15.2921	1512.37	26.8062	1512.37	26.8062	97.5086
PennSS-Spot 228	97.3072	99429.2	2.81462	10.566	1.34375	3.35996	2.3953	0.25748	1.98288	0.827819	1476.93	26.1733	1495.11	18.7453	1520.97	25.3362	1520.97	25.3362	97.1048
PennSS-Spot 63	69.2961	31439.9	1.41034	10.5472	1.39956	3.49395	2.50072	0.267272	2.0724	0.828721	1526.94	28.1759	1525.85	19.7441	1524.32	26.3768	1524.32	26.3768	100.172
PennSS-Spot 225	31.4292	67085	1.44801	10.5017	2.14451	3.35149	3.1031	0.255268	2.24284	0.722774	1465.58	29.4022	1493.14	24.2722	1532.46	40.3765	1532.46	40.3765	95.6359
PennSS-Spot 274	80.9361	152288	3.23267	10.2771	1.45713	3.55672	2.70457	0.265107	2.27848	0.842456	1515.92	30.7794	1539.93	21.4383	1573.05	27.2864	1573.05	27.2864	96.368
PennSS-Spot 156	166.086	121145	2.47909	10.181	1.38674	3.81993	2.73679	0.282063	2.35944	0.862121	1601.74	33.4632	1596.95	22.0269	1590.62	25.9086	1590.62	25.9086	100.699
PennSS-Spot 265	158.903	60050.6	1.7413	10.166	1.52675	3.30939	2.58845	0.244005	2.09024	0.807525	1407.48	26.4297	1483.27	20.1864	1593.37	28.513	1593.37	28.513	88.3336
PennSS-Spot 99	103.661	182287	1.83986	10.1577	1.44673	3.487	2.56013	0.25689	2.11216	0.825023	1473.91	27.829	1524.28	20.2043	1594.9	27.0128	1594.9	27.0128	92.4138
PennSS-Spot 133	183.255	226379	2.12936	10.0702	1.13746	3.7819	2.37206	0.276215	2.08155	0.87753	1572.27	29.0423	1588.91	19.0509	1611.05	21.1943	1611.05	21.1943	97.5931
PennSS-Spot 129	265.078	77532.4	2.9968	10.0443	1.24328	3.61146	2.85996	0.263088	2.57559	0.900567	1505.62	34.5833	1552.06	22.7461	1615.84	23.152	1615.84	23.152	93.1792
PennSS-Spot 20	30.7764	50013.6	3.25125	9.95587	1.77543	4.0542	2.84311	0.292741	2.22061	0.781051	1655.21	32.4166	1645.14	23.1607	1632.29	32.9918	1632.29	32.9918	101.405
PennSS-Spot 169	145.531	208278	1.48947	9.94335	1.35616	3.88801	2.35284	0.280388	1.92268	0.817174	1593.31	27.1422	1611.2	19.005	1634.63	25.1932	1634.63	25.1932	97.4727
PennSS-Spot 275	79.4386	55672.3	1.04103	9.90675	1.42556	3.96565	2.2046	0.284934	1.68168	0.762805	1616.16	24.0396	1627.2	17.879	1641.47	26.4577	1641.47	26.4577	98.4581
PennSS-Spot 110	111.362	96580.3	1.43254	9.90122	1.52024	3.98702	3.05611	0.28631	2.65116	0.867497	1623.06	38.0409	1631.56	24.8138	1642.51	28.2116	1642.51	28.2116	98.816
PennSS-Spot 200	50.8591	29344.8	1.49646	9.84697	1.59942	3.23841	2.90579	0.231277	2.426	0.834885	1341.19	29.3757	1466.4	22.5473	1652.7	29.6442	1652.7	29.6442	81.1515
PennSS-Spot 185	653.274	59047.1	1.10839	9.82151	1.15252	4.04166	2.24635	0.287897	1.92816	0.858351	1631.01	27.7855	1642.62	18.2869	1657.5	21.347	1657.5	21.347	98.4021
PennSS-Spot 115	125.307	70736.6	2.18027	9.8051	1.42896	3.97126	2.57744	0.282409	2.14506	0.832243	1603.48	30.4518	1628.34	20.9094	1660.59	26.4577	1660.59	26.4577	96.5609
PennSS-Spot 80	248.377	124227	3.25318	9.77569	1.4071	3.86128	2.39795	0.273765	1.94172	0.809738	1559.88	26.9026	1605.63	19.3421	1666.15	26.0344	1666.15	26.0344	93.622
PennSS-Spot 50	229.585	192471	1.38399	9.76066	1.45466	3.96734	2.6434	0.280852	2.20715	0.834967	1595.65	31.1984	1627.54	21.4404	1669	26.9047	1669	26.9047	95.6056
PennSS-Spot 314	74.6404	47918	2.20173	9.73304	1.51766	4.02725	2.59521	0.284286	2.10519	0.811182	1612.91	30.0405	1639.71	21.1127	1674.24	28.0514	1674.24	28.0514	96.3373
PennSS-Spot 259	99.9648	100432	1.7998	9.72557	1.26345	4.14045	2.30674	0.292053	1.92996	0.83666	1651.78	28.1222	1662.32	18.8679	1675.65	23.3479	1675.65	23.3479	98.5752
PennSS-Spot 143	206.84	166839	1.71531	9.69576	1.21703	4.12456	2.30838	0.29004	1.96149	0.849727	1641.73	28.4291	1659.18	18.8672	1681.33	22.472	1681.33	22.472	97.645
PennSS-Spot 42	296.862	1.25069e+06	5.6749	9.68476	1.25186	4.22951	2.22324	0.297083	1.83729	0.826403	1676.83	27.1275	1679.77	18.2597	1683.42	23.1091	1683.42	23.1091	99.6082
PennSS-Spot 278	195.785	148559	3.50893	9.68155	1.05822	4.03872	1.97752	0.283587	1.67056	0.844773	1609.4	23.7927	1642.03	16.0958	1684.03	19.534	1684.03	19.534	95.5684
PennSS-Spot 28	175.3	106995	3.16904	9.53617	1.11368	4.19576	1.88172	0.290191	1.51678	0.806056	1642.48	21.9923	1673.19	15.4305	1711.91	20.4855	1711.91	20.4855	95.9443
PennSS-Spot 292	88.2525	42898.3	0.925489	9.48066	1.38423	4.32371	2.63034	0.297299	2.23665	0.850327	1677.9	33.0425	1697.89	21.6945	1722.64	25.4269	1722.64	25.4269	97.4027
PennSS-Spot 36	327.21	78449.5	1.93082	9.43983	1.16577	4.48691	2.37906	0.307192	2.07386	0.871716	1726.87	31.4176	1728.55	19.7565	1730.57	21.3937	1730.57	21.3937	99.7866
PennSS-Spot 291	57.4899	88976.5	1.236	9.3993	1.42103	4.39642	2.4118	0.299705	1.94871	0.807989	1689.85	28.9679	1711.67	19.9536	1738.46	26.0531	1738.46	26.0531	97.2035
PennSS-Spot 56	219.301	847061	1.29933	9.3983	1.48049	4.59193	2.87857	0.312999	2.46867	0.857601	1755.45	37.9372	1747.8	24.0061	1738.66	27.1429	1738.66	27.1429	100.966
PennSS-Spot 227	98.0985	76472.5	1.92271	9.39544	1.14718	4.23026	2.09041	0.288259	1.74751	0.835966	1632.82	25.207	1679.91	17.1691	1739.21	21.0297	1739.21	21.0297	93.8828
PennSS-Spot 313	56.9983	46384.2	1.11957	9.38641	1.36456	4.23435	2.07122	0.28826	1.55818	0.7523	1632.83	22.476	1680.71	17.0146	1740.98	25.0098	1740.98	25.0098	93.7881
PennSS-Spot 141	570.838	514599	2.90913	9.38529	1.28638	4.5317	1.94702	0.308466	1.46155	0.75066	1733.15	22.2116	1736.81	16.1972	1741.2	23.576	1741.2	23.576	99.5382
PennSS-Spot 294	135.585	242406	1.50195	9.36816	1.39183	4.47292	2.41531	0.303909	1.97396	0.817272	1710.67	29.659	1725.96	20.0461	1744.54	25.4982	1744.54	25.4982	98.0583
PennSS-Spot 219	115.561	53758.5	5.09209	9.33504	1.37467	4.57544	2.69096	0.309776	2.31334	0.85967	1739.6	35.2705	1744.8	22.4265	1751.03	25.1636	1751.03	25.1636	99.3477
PennSS-Spot 176	341.334	177931	1.22304	9.21847	1.61355	4.45602	2.79442	0.297923	2.28149	0.816447	1681	33.7596	1722.82	23.1775	1773.99	29.4531	1773.99	29.4531	94.7581
PennSS-Spot 285	544.549	49622.7	3.0662	9.20992	1.66925	3.83138	2.40989	0.255923	1.73816	0.721261	1468.95	22.8327	1599.36	19.4073	1775.69	30.4635	1775.69	30.4635	82.7257
PennSS-Spot 211	186.029	63387.1	1.50179	9.18994	1.40748	4.5972	2.38368	0.306412	1.92378	0.807063	1723.02	29.0872	1748.76	19.8818	1779.65	25.6729	1779.65	25.6729	96.8181
PennSS-Spot 62	222.534	68824.2	2.2626	9.1701	1.04901	4.72907	1.9113	0.31452	1.5977	0.835923	1762.91	24.6432	1772.4	16.0209	1783.59	19.1241	1783.59	19.1241	98.8407
PennSS-Spot 21	157.514	328751	2.05262	9.15751	1.22308	4.71061	2.61586	0.312862	2.31231	0.88396	1754.78	35.5225	1769.13	21.9132	1786.09	22.2911	1786.09	22.2911	98.2467
PennSS-Spot 204	224.385	115778	0.668724	9.11414	1.32929	4.28297	2.28054	0.283113	1.85307	0.812555	1607.02	26.3576	1690.09	18.7752	1794.74	24.1995	1794.74	24.1995	89.5404
PennSS-Spot 116	395.95	1.29554e+06	1.37418	9.09916	1.10142	4.59968	2.08832	0.303548	1.77425	0.849606	1708.88	26.634	1749.21	17.4195	1797.74	20.0429	1797.74	20.0429	95.0572
PennSS-Spot 9	222.727	183955	1.59653	9.05731	1.46505	5.01866	2.28657	0.329675	1.75557	0.767776	1836.8	28.0595	1822.47	19.3622	1806.12	26.6344	1806.12	26.6344	101.699
PennSS-Spot 284	213.388	168404	1.9309	9.02474	0.875451	4.97229	1.83526	0.325454	1.613	0.878894	1816.31	25.5317	1814.62	15.5159	1812.67	15.9026	1812.67	15.9026	100.201
PennSS-Spot 171	161.578	402381	8.14009	8.73778	1.09905	5.28636	2.16156	0.335009	1.86129	0.861089	1862.61	30.1098	1866.66	18.4587	1871.16	19.8218	1871.16	19.8218	99.5435
PennSS-Spot 214	19.7571	35470.3	0.934055	8.66905	1.63478	5.25805	2.58042	0.330594	1.99651	0.773715	1841.26	31.9773	1862.08	22.0178	1885.39	29.4385	1885.39	29.4385	97.6594
PennSS-Spot 272	152.968	207898	0.966927	8.35144	1.1699	5.88614	2.18049	0.356526	1.84007	0.843881	1965.68	31.1759	1959.19	18.9273	1952.33	20.899	1952.33	20.899	100.684
PennSS-Spot 312	423.006	807108	2.51273	8.29002	1.37623	5.50008	2.44156	0.330692	2.01672	0.826	1841.74	32.3083	1900.61	20.9802	1965.5	24.5477	1965.5	24.5477	93.7032
PennSS-Spot 35	135.362	131760	2.77289	8.2752	1.01229	5.54064	2.19581	0.332534	1.94855	0.887395	1850.65	31.3467	1906.92	18.8892	1968.69	18.0484	1968.69	18.0484	94.0043
PennSS-Spot 224	618.251	1.35256e+06	3.97779	8.25553	1.46849	5.789	2.48215	0.346615	2.00116	0.806218	1918.41	33.2053	1944.77	21.4942	1972.93	26.1707	1972.93	26.1707	97.2367
PennSS-Spot 172	171.781	135273	1.56613	8.1851	1.26874	5.68105	2.39811	0.337249	2.03501	0.848586	1873.42	33.0846	1928.49	20.7083	1988.19	22.5701	1988.19	22.5701	94.2276
PennSS-Spot 86	333.763	101987	9.09228	8.1527	1.11813	5.83049	2.46602	0.34475	2.19796	0.891299	1909.48	36.325	1950.95	21.3768	1995.24	19.8741	1995.24	19.8741	95.7018
PennSS-Spot 260	313.914	100244	3.25583	8.13595	1.25881	5.23336	2.09478	0.308807	1.67436	0.799302	1734.84	25.4672	1858.06	17.8596	1998.9	22.3657	1998.9	22.3657	86.7897
PennSS-Spot 308	319.486	67415.7	10.9768	7.88034	1.14497	5.81941	2.46696	0.3326	2.18516	0.885772	1850.97	35.1584	1949.3	21.379	2055.42	20.2086	2055.42	20.2086	90.0531
PennSS-Spot 201	203.851	50100.3	2.15729	7.30501	1.08564	7.58376	2.0988	0.401795	1.79621	0.855824	2177.3	33.1893	2182.94	18.8304	2188.24	18.8807	2188.24	18.8807	99.5001
PennSS-Spot 67	129.851	163857	2.0549	6.30675	1.31322	10.6236	2.66756	0.485931	2.32193	0.870431	2553.05	48.9499	2490.77	24.7606	2440.35	22.2395	2440.35	22.2395	104.618
PennSS-Spot 34	65.5501	84715.6	3.75839	6.29126	1.04911	9.32527	2.12215	0.425498	1.84469	0.869255	2285.39	35.4957	2370.51	19.4634	2444.52	17.7614	2444.52	17.7614	93.4905
PennSS-Spot 262	101.609	58790.1	1.84555	5.75418	1.34341	10.4286	2.22016	0.43522	1.76759	0.796154	2329.21	34.5537	2473.6	20.5734	2594.44	22.4059	2594.44	22.4059	89.777
PennSS-Spot 270	96.9128	121031	1.31798	5.64162	1.21878	11.1668	2.20291	0.456909	1.83505	0.83301	2425.9	37.0995	2537.15	20.5324	2627.33	20.2625	2627.33	20.2625	92.333
PennSS-Spot 244	143.504	86915.7	1.19729	5.62486	1.22257	12.0293	2.13675	0.49074	1.75244	0.820141	2573.88	37.1891	2606.69	20.0336	2632.28	20.3159	2632.28	20.3159	97.7813
PennSS-Spot 246	245.336	193686	3.25171	5.53411	1.09832	12.0356	1.95906	0.483076	1.62222	0.828062	2540.65	34.0632	2607.19	18.368	2659.27	18.2041	2659.27	18.2041	95.5394
PennSS-Spot 107	168.616	166632	3.15155	5.45788	1.08723	12.8765	1.89876	0.509708	1.55667	0.819836	2655.38	33.8804	2670.66	17.8922	2682.24	17.9809	2682.24	17.9809	98.9988
PennSS-Spot 281	74.2935	5.35542e+06	1.84827	5.45033	1.24562	11.7245	2.17291	0.463464	1.78044	0.819381	2454.83	36.3483	2582.66	20.3321	2684.53	20.5967	2684.53	20.5967	91.4439
PennSS-Spot 94	106.908	70771.2	1.08582	5.39056	1.19539	12.9213	2.19296	0.505173	1.8385	0.838367	2635.99	39.7778	2673.93	20.6703	2702.74	19.7324	2702.74	19.7324	97.5302
PennSS-Spot 239	506.978	106184	7.2512	5.38355	1.16877	10.9966	2.03654	0.429364	1.66777	0.818924	2302.85	32.2954	2522.84	18.9571	2704.89	19.289	2704.89	19.289	85.1367
PennSS-Spot 13	54.9669	207503	2.2228	5.30317	1.26322	13.3596	2.43738	0.513839	2.08449	0.855218	2673	45.6113	2705.4	23.0292	2729.69	20.7998	2729.69	20.7998	97.9233
PennSS-Spot 134	92.5646	77359.9	0.912217	5.25376	1.02935	13.6007	2.11921	0.51824	1.85243	0.874112	2691.71	40.7621	2722.31	20.047	2745.09	16.9242	2745.09	16.9242	98.0556
PennSS-Spot 212	23.1892	43554.1	1.04239	5.2127	1.51356	12.7323	2.73455	0.481359	2.27749	0.832854	2533.18	47.7079	2660.05	25.7498	2757.98	24.858	2757.98	24.858	91.8492
PennSS-Spot 79	102.891	191616	2.33002	5.07789	1.17504	14.3633	2.24115	0.528975	1.90842	0.851533	2737.13	42.563	2774.01	21.2782	2800.92	19.2217	2800.92	19.2217	97.7224
PennSS-Spot 12	120.916	54072.4	3.42668	4.62802	1.53942	15.7067	2.63263	0.527204	2.13563	0.811215	2729.66	47.5262	2859.12	25.1364	2951.66	24.8502	2951.66	24.8502	92.4789
PennSS-Spot 197	63.8453	120635	4.42386	3.87496	1.314	22.2417	2.32959	0.625078	1.92364	0.825742	3130.09	47.6991	3194.34	22.6403	3234.93	20.725	3234.93	20.725	96.7591
Dobbs Valley sandstone, sample 4 (Middle Pennsylvanian)
DOBB'S-80 <>	94.5392	11710.3	1.06872	17.8162	6.12699	0.553665	6.75367	0.0715419	2.84113	0.420679	445.439	12.2282	447.394	24.4424	457.483	136.014	445.439	12.2282	97.3671
DOBB'S-84 <>	127.536	31301.4	1.7507	16.9999	3.14706	0.635783	3.49552	0.0783887	1.52141	0.435244	486.498	7.12921	499.692	13.796	560.608	68.6049	486.498	7.12921	86.7804
DOBB'S-38 <>	126.756	26883.8	1.09906	17.6028	3.0934	0.631053	3.6481	0.0805652	1.93378	0.530078	499.495	9.29441	496.752	14.3326	484.15	68.3203	499.495	9.29441	103.17
DOBB'S-65 <>	141.315	40948.4	3.47486	17.364	4.49361	0.650601	5.68683	0.081934	3.48533	0.612877	507.656	17.0148	508.849	22.7639	514.213	98.7581	507.656	17.0148	98.7249
DOBB'S-83 <>	102.794	23492.6	0.72359	17.0657	5.08363	0.670235	5.88874	0.0829563	2.9722	0.504726	513.745	14.6769	520.855	23.9984	552.14	111.042	513.745	14.6769	93.046
DOBB'S-105 <>	110.671	49669	0.787352	17.1233	4.09783	0.669085	4.59446	0.0830938	2.07772	0.452222	514.563	10.2756	520.156	18.7032	544.783	89.5945	514.563	10.2756	94.4528
DOBB'S-121 <>	106.779	31136	1.56932	17.118	3.56189	0.702962	3.82737	0.0872735	1.40062	0.365947	539.392	7.24739	540.558	16.0433	545.502	77.8312	539.392	7.24739	98.8799
DOBB'S-31 <>	118.781	19759.6	1.83888	18.1349	5.129	0.669565	5.86686	0.0880655	2.84842	0.48551	544.086	14.8619	520.448	23.8949	417.979	114.61	544.086	14.8619	130.171
DOBB'S-120 <>	132.981	30530.2	2.28277	17.2333	3.44261	0.710175	4.48258	0.0887631	2.87088	0.640452	548.218	15.0881	544.85	18.9031	530.809	75.4249	548.218	15.0881	103.28
DOBB'S-124 <>	60.0285	11594.2	3.52146	17.8446	6.94461	0.688665	7.89336	0.0891278	3.75199	0.475335	550.377	19.7932	531.998	32.6969	453.951	154.312	550.377	19.7932	121.241
DOBB'S-61 <>	31.3401	9434.5	0.647998	18.2561	11.6055	0.680482	11.9531	0.0900997	2.86187	0.239425	556.127	15.2485	527.066	49.1851	403.078	260.653	556.127	15.2485	137.97
DOBB'S-101 <>	70.2719	42839.3	1.15367	16.1636	5.8473	0.776861	6.41694	0.0910711	2.64315	0.411902	561.868	14.2222	583.691	28.4945	669.526	125.241	561.868	14.2222	83.9204
DOBB'S-32 <>	73.7566	26431.9	1.71005	19.4424	6.50547	0.654052	6.61714	0.0922274	1.21054	0.18294	568.697	6.58938	510.969	26.5744	260.353	149.552	568.697	6.58938	218.433
DOBB'S-123 <>	62.2803	11412.4	1.46398	17.7706	7.44602	0.720912	7.95915	0.0929144	2.81158	0.353251	572.75	15.4087	551.205	33.8674	463.169	165.22	572.75	15.4087	123.659
DOBB'S-115 <>	59.0158	11589.9	0.705893	16.9349	6.5984	0.759944	6.99629	0.0933388	2.32576	0.332428	575.253	12.7995	573.978	30.684	568.953	143.771	575.253	12.7995	101.107
DOBB'S-64 <>	64.9126	4115.29	0.637349	16.1299	4.33905	0.82973	7.01376	0.0970661	5.51048	0.785668	597.192	31.4301	613.462	32.3055	673.987	92.8253	597.192	31.4301	88.6058
DOBB'S-107 <>	52.9354	17146.7	0.986834	17.2973	7.97028	0.775479	8.24504	0.0972855	2.11075	0.256003	598.481	12.0638	582.901	36.5818	522.636	175.101	598.481	12.0638	114.512
DOBB'S-81 <>	40.251	16103.7	6.18089	15.8245	3.90066	0.871497	4.18197	0.100022	1.50789	0.360568	614.535	8.83851	636.38	19.7762	714.722	82.8733	614.535	8.83851	85.9824
DOBB'S-82 <>	80.16	25937.4	1.14003	16.348	6.03543	0.846633	6.13254	0.100383	1.08702	0.177254	616.65	6.39248	622.799	28.5561	645.223	129.798	616.65	6.39248	95.5716
DOBB'S-69 <>	238.642	114985	6.12361	16.3519	0.979984	0.852398	1.47147	0.10109	1.09766	0.745962	620.795	6.4964	625.965	6.87538	644.712	21.0679	620.795	6.4964	96.2903
DOBB'S-44 <>	323.473	23632.9	1.06978	16.2893	1.49301	0.897778	3.77713	0.106064	3.46953	0.918563	649.85	21.4476	650.539	18.1452	652.946	32.0634	649.85	21.4476	99.5258
DOBB'S-108 <>	134.594	54610.4	2.17954	14.433	1.34116	1.47566	4.25001	0.15447	4.03285	0.948904	925.972	34.7853	920.453	25.7282	907.23	27.6426	907.23	27.6426	102.066
DOBB'S-95 <>	102.273	56137.1	1.48004	14.3441	3.02553	1.46446	3.48853	0.152352	1.73666	0.497819	914.132	14.8011	915.846	21.0518	919.999	62.2376	919.999	62.2376	99.3623
DOBB'S-72 <>	158.086	12142.5	1.25085	14.0877	4.09816	1.47848	4.14722	0.151062	0.636076	0.153374	906.914	5.38126	921.61	25.125	956.932	83.7918	956.932	83.7918	94.7731
DOBB'S-19 <>	62.642	46487	68.9765	13.9762	3.75013	1.64096	4.49015	0.166335	2.46941	0.54996	991.887	22.7025	986.08	28.3361	973.198	76.5162	973.198	76.5162	101.92
DOBB'S-34 <>	79.8605	41335.8	2.57421	13.9734	2.593	1.67766	3.35295	0.170022	2.1257	0.633979	1012.23	19.9128	1000.09	21.3338	973.568	52.8618	973.568	52.8618	103.971
DOBB'S-33 <>	545.339	73626.9	2.02588	13.9688	0.438178	1.59958	1.20743	0.162055	1.12512	0.931828	968.188	10.1147	970.047	7.54404	974.263	8.93414	974.263	8.93414	99.3765
DOBB'S-66 <>	100.711	20853.4	0.737005	13.9606	1.82343	1.69415	3.11043	0.171536	2.51989	0.810144	1020.57	23.7849	1006.33	19.8626	975.443	37.1732	975.443	37.1732	104.626
DOBB'S-24 <>	356.072	113680	2.2101	13.861	0.527452	1.68473	1.94799	0.169366	1.87522	0.962645	1008.62	17.5084	1002.77	12.4128	990.005	10.7287	990.005	10.7287	101.88
DOBB'S-52 <>	42.2913	16386.1	0.625065	13.8531	4.42604	1.64571	4.94183	0.165349	2.19814	0.444803	986.433	20.1057	987.908	31.2224	991.206	90.0566	991.206	90.0566	99.5184
DOBB'S-118 <>	22.0494	21249.3	2.09769	13.6911	6.33868	1.74791	7.07111	0.173562	3.13397	0.443208	1031.71	29.879	1026.39	45.7011	1015.05	128.55	1015.05	128.55	101.641
DOBB'S-68 <>	59.6585	17658.2	1.34115	13.6907	2.55061	1.72182	5.76417	0.170966	5.16915	0.896772	1017.43	48.6532	1016.7	37.0414	1015.11	51.6873	1015.11	51.6873	100.228
DOBB'S-13 <>	57.8344	16029.6	2.94364	13.6886	3.01416	1.72531	3.74945	0.171288	2.23007	0.594772	1019.2	21.0233	1018.01	24.1063	1015.41	61.1013	1015.41	61.1013	100.374
DOBB'S-111 <>	198.211	297098	1.86433	13.6766	1.1525	1.71795	1.18822	0.170407	0.289171	0.243365	1014.36	2.71409	1015.26	7.62614	1017.19	23.3452	1017.19	23.3452	99.721
DOBB'S-3 <>	267.763	115207	3.14994	13.6013	0.726292	1.76026	0.886918	0.173642	0.509042	0.573945	1032.14	4.85501	1030.94	5.74307	1028.37	14.6865	1028.37	14.6865	100.367
DOBB'S-77 <>	188.96	116208	1.19342	13.5154	0.774766	1.78092	1.07404	0.174571	0.743835	0.692561	1037.25	7.12669	1038.51	6.98411	1041.16	15.6551	1041.16	15.6551	99.624
DOBB'S-94 <>	45.5799	39125.9	1.06454	13.4888	4.77577	1.8509	5.09749	0.181074	1.78225	0.349633	1072.84	17.6144	1063.75	33.616	1045.17	96.375	1045.17	96.375	102.647
DOBB'S-93 <>	123.178	142477	1.53325	13.4798	1.60342	1.76394	3.12687	0.172451	2.68447	0.858515	1025.6	25.4537	1032.3	20.2653	1046.53	32.3418	1046.53	32.3418	98.0005
DOBB'S-75 <>	28.1198	14517.4	0.505436	13.4789	6.49538	1.62282	7.60719	0.158643	3.95973	0.520524	949.233	34.951	979.083	47.8274	1046.67	131.112	1046.67	131.112	90.6911
DOBB'S-9 <>	178.213	82054.4	1.51527	13.4476	1.10185	1.79602	2.08599	0.175168	1.77124	0.849111	1040.52	17.0197	1044.02	13.6063	1051.35	22.2227	1051.35	22.2227	98.9707
DOBB'S-70 <>	69.0292	39620.5	1.72134	13.4217	3.01118	1.76326	4.08609	0.171641	2.76205	0.675964	1021.15	26.0843	1032.05	26.4808	1055.23	60.6755	1055.23	60.6755	96.7701
DOBB'S-35 <>	179.751	97460.2	4.08031	13.3669	0.934773	1.83253	2.44711	0.177656	2.26154	0.924166	1054.16	21.9931	1057.19	16.0767	1063.46	18.8108	1063.46	18.8108	99.1249
DOBB'S-73 <>	146.041	49316.3	4.51527	13.3459	1.42631	1.82935	3.15674	0.177069	2.81614	0.892104	1050.94	27.3096	1056.05	20.7271	1066.63	28.696	1066.63	28.696	98.5291
DOBB'S-1 <>	138.875	109202	1.3737	13.315	1.30195	1.89055	2.16871	0.18257	1.73443	0.799749	1081	17.2615	1077.78	14.4035	1071.28	26.1443	1071.28	26.1443	100.907
DOBB'S-11 <>	229.665	141662	1.75863	13.2974	0.761506	1.81378	2.04013	0.174925	1.89269	0.927726	1039.19	18.1651	1050.44	13.3539	1073.94	15.2932	1073.94	15.2932	96.7643
DOBB'S-12 <>	146.743	54439.1	2.19645	13.2258	1.19604	1.83521	3.21345	0.176038	2.98257	0.928153	1045.29	28.7804	1058.15	21.1234	1084.77	23.9633	1084.77	23.9633	96.3607
DOBB'S-112 <>	79.7321	57042.1	1.43583	13.1886	1.97409	1.89929	2.13267	0.181672	0.806992	0.378396	1076.1	7.99796	1080.84	14.1867	1090.39	39.5373	1090.39	39.5373	98.6899
DOBB'S-56 <>	44.0733	31375.6	0.738086	13.1262	2.46399	1.96793	4.02327	0.187347	3.18048	0.790521	1106.99	32.3507	1104.6	27.0937	1099.88	49.2888	1099.88	49.2888	100.646
DOBB'S-78 <>	89.0185	41187.6	1.56499	13.113	1.23191	1.93771	1.6405	0.184285	1.08335	0.660379	1090.34	10.8673	1094.21	10.9876	1101.92	24.6385	1101.92	24.6385	98.9491
DOBB'S-85 <>	284.022	104136	2.37398	12.8367	0.401984	2.06947	0.627679	0.192668	0.482069	0.768018	1135.81	5.02015	1138.76	4.29701	1144.35	7.97081	1144.35	7.97081	99.2534
DOBB'S-50 <>	110.941	56273.1	1.67301	12.8352	1.01576	2.13741	1.75234	0.198971	1.42791	0.814859	1169.79	15.2757	1160.99	12.1223	1144.58	20.168	1144.58	20.168	102.202
DOBB'S-7 <>	167.27	16778.9	2.1992	12.6671	1.6368	2.07732	3.71207	0.190845	3.33172	0.897537	1125.95	34.4205	1141.35	25.4488	1170.76	32.3889	1170.76	32.3889	96.1729
DOBB'S-15 <>	97.922	84355.9	1.99871	12.6652	1.19609	2.07665	2.54936	0.190755	2.25136	0.883107	1125.46	23.2497	1141.13	17.4739	1171.06	23.6881	1171.06	23.6881	96.1066
DOBB'S-25 <>	69.9001	45081.2	1.85454	12.6412	2.30164	2.13414	2.80406	0.195663	1.60162	0.571179	1151.98	16.8958	1159.93	19.3898	1174.82	45.55	1174.82	45.55	98.0557
DOBB'S-100 <>	127.322	84549.2	2.36066	12.6227	1.3371	2.19528	2.67361	0.200975	2.31524	0.86596	1180.56	24.9761	1179.54	18.6534	1177.71	26.4428	1177.71	26.4428	100.242
DOBB'S-55 <>	206.775	213771	1.41892	12.3491	0.80187	2.31731	1.81922	0.207548	1.63296	0.897617	1215.74	18.093	1217.6	12.9044	1220.89	15.7779	1220.89	15.7779	99.5782
DOBB'S-91 <>	104.407	30717.3	1.92085	12.2749	1.53278	2.33338	2.26114	0.207731	1.66233	0.735175	1216.72	18.4318	1222.51	16.0729	1232.76	30.0651	1232.76	30.0651	98.6986
DOBB'S-47 <>	115.776	72355.6	1.88633	12.2615	1.07905	2.46742	1.41366	0.219424	0.913278	0.646039	1278.83	10.5938	1262.54	10.2147	1234.9	21.1771	1234.9	21.1771	103.557
DOBB'S-10 <>	30.5969	16671	1.29638	12.0803	3.78139	2.27584	4.00368	0.199396	1.31551	0.328574	1172.08	14.0983	1204.83	28.2502	1264.04	73.8882	1264.04	73.8882	92.7242
DOBB'S-63 <>	41.7102	35010.4	1.05366	11.889	2.44139	2.639	2.90138	0.227554	1.56769	0.540325	1321.67	18.7337	1311.58	21.3676	1295.11	47.4672	1295.11	47.4672	102.051
DOBB'S-98 <>	78.4116	31414.5	2.53445	11.8024	2.30397	2.51971	3.1081	0.215684	2.08615	0.671198	1259.03	23.8596	1277.74	22.5964	1309.32	44.7028	1309.32	44.7028	96.159
DOBB'S-4 <>	36.6279	18123.4	1.27965	11.6589	2.52356	2.66143	4.63459	0.225046	3.8873	0.838758	1308.48	46.0355	1317.82	34.2192	1333.02	48.8229	1333.02	48.8229	98.1597
DOBB'S-122 <>	104.104	36942.3	1.52437	11.6313	1.01352	2.75269	1.19693	0.232213	0.636734	0.531972	1346.08	7.73529	1342.82	8.91508	1337.6	19.5936	1337.6	19.5936	100.635
DOBB'S-88 <>	129.09	67156.8	1.15518	11.5042	1.01254	2.77128	4.13029	0.231226	4.00426	0.969485	1340.92	48.4783	1347.83	30.8273	1358.8	19.5173	1358.8	19.5173	98.6839
DOBB'S-117 <>	44.2623	27664.6	0.907984	11.5041	1.31085	2.76034	1.87512	0.23031	1.34081	0.715049	1336.12	16.1802	1344.88	13.9773	1358.83	25.2668	1358.83	25.2668	98.3291
DOBB'S-54 <>	50.9049	34194	1.72425	11.4718	2.14691	2.7934	3.13787	0.232414	2.28845	0.729301	1347.14	27.8207	1353.77	23.4664	1364.25	41.3535	1364.25	41.3535	98.7459
DOBB'S-114 <>	18.3316	45394.1	1.19109	11.4389	5.80569	2.7939	6.18311	0.23179	2.12716	0.344028	1343.87	25.8036	1353.91	46.266	1369.77	111.818	1369.77	111.818	98.1093
DOBB'S-57 <>	83.9126	76568	1.05244	11.4388	0.860813	2.88959	1.59653	0.239727	1.34458	0.842191	1385.28	16.7609	1379.2	12.0437	1369.79	16.5667	1369.79	16.5667	101.131
DOBB'S-79 <>	28.356	12521	1.99086	11.0984	2.92408	2.95077	3.27146	0.237517	1.46705	0.448438	1373.78	18.1513	1395.04	24.8149	1427.69	55.8394	1427.69	55.8394	96.2238
DOBB'S-87 <>	82.1367	39086.2	1.25681	10.9528	1.34326	3.11398	3.48537	0.247366	3.21613	0.92275	1424.88	41.1152	1436.15	26.7937	1452.87	25.5601	1452.87	25.5601	98.0732
DOBB'S-60 <>	64.0882	51824.7	1.51347	10.6762	2.11071	3.40558	2.64529	0.263696	1.59451	0.602774	1508.73	21.4491	1505.68	20.7659	1501.39	39.9042	1501.39	39.9042	100.489
DOBB'S-42 <>	88.7907	91506	1.89933	10.6256	0.786346	3.46929	2.37025	0.267358	2.23601	0.943365	1527.38	30.408	1520.26	18.6842	1510.36	14.8462	1510.36	14.8462	101.127
DOBB'S-49 <>	186.977	225314	1.43806	10.3069	0.444478	3.6814	1.0648	0.275194	0.967593	0.90871	1567.11	13.4609	1567.34	8.50246	1567.64	8.32771	1567.64	8.32771	99.9662
DOBB'S-96 <>	37.8786	38920.8	0.631841	10.131	1.65076	3.88866	2.77551	0.285728	2.23125	0.803905	1620.14	31.9648	1611.33	22.4209	1599.81	30.8037	1599.81	30.8037	101.271
DOBB'S-41 <>	206.282	84144.5	1.83396	9.91986	0.540661	4.0045	1.21858	0.288106	1.09207	0.896184	1632.06	15.746	1635.11	9.90113	1639.02	10.0384	1639.02	10.0384	99.5754
DOBB'S-27 <>	14.6336	8644.21	2.07453	9.72035	4.871	4.30122	5.51594	0.30323	2.58823	0.469228	1707.3	38.822	1693.59	45.4732	1676.65	90.0524	1676.65	90.0524	101.829
DOBB'S-90 <>	32.9162	38299	1.47391	9.70258	3.39029	4.20029	4.27893	0.295573	2.61059	0.610103	1669.32	38.3942	1674.08	35.1067	1680.03	62.6294	1680.03	62.6294	99.3627
DOBB'S-58 <>	202.966	82998.3	4.30012	9.40008	0.434111	4.63843	0.703376	0.316229	0.553431	0.78682	1771.29	8.57141	1756.21	5.87537	1738.31	7.95752	1738.31	7.95752	101.897
DOBB'S-2 <>	63.695	53302.4	1.32403	9.38208	1.18307	4.57141	1.4134	0.311063	0.773332	0.547144	1745.93	11.8279	1744.07	11.776	1741.82	21.6806	1741.82	21.6806	100.236
DOBB'S-119 <>	139.175	99928.5	1.22513	9.35058	0.618661	4.7238	3.93533	0.320353	3.8864	0.987566	1791.45	60.788	1771.47	32.9892	1747.98	11.3276	1747.98	11.3276	102.487
DOBB'S-48 <>	176.166	122259	2.64493	9.31269	0.372925	4.65107	1.88437	0.314143	1.8471	0.980221	1761.06	28.464	1758.49	15.749	1755.41	6.82291	1755.41	6.82291	100.322
DOBB'S-28 <>	97.7684	70868.9	1.18695	9.28771	0.711876	4.2596	4.41096	0.28693	4.35314	0.986891	1626.17	62.5684	1685.59	36.2881	1760.33	13.0164	1760.33	13.0164	92.3789
DOBB'S-45 <>	136.176	103593	1.21316	9.28645	0.42219	4.58945	2.54459	0.309107	2.50932	0.98614	1736.31	38.1956	1747.35	21.2179	1760.57	7.7193	1760.57	7.7193	98.622
DOBB'S-26 <>	211.372	72451	2.66686	9.14945	0.449689	4.91807	0.912047	0.326354	0.793479	0.869998	1820.68	12.5859	1805.36	7.69609	1787.7	8.19277	1787.7	8.19277	101.845
DOBB'S-59 <>	101.966	108609	2.06685	8.84511	0.634536	5.18956	1.92284	0.332915	1.81513	0.943981	1852.49	29.2253	1850.91	16.3713	1849.11	11.4747	1849.11	11.4747	100.183
DOBB'S-102 <>	62.3232	65827.7	0.637023	8.73464	0.941949	5.34917	2.30913	0.338868	2.10827	0.913016	1881.22	34.3987	1876.76	19.7561	1871.8	16.9902	1871.8	16.9902	100.503
DOBB'S-89 <>	82.8249	98739.1	0.923749	8.53751	0.591562	5.54561	3.13777	0.343383	3.08151	0.982068	1902.92	50.7772	1907.7	26.9993	1912.87	10.6178	1912.87	10.6178	99.4799
DOBB'S-17 <>	72.369	56109.9	0.941297	8.19742	0.81784	5.95626	3.19829	0.354119	3.09196	0.966753	1954.24	52.126	1969.48	27.8134	1985.51	14.5523	1985.51	14.5523	98.4248
DOBB'S-20 <>	126.08	144224	0.716793	8.18172	0.633415	5.97722	3.32664	0.354685	3.26578	0.981705	1956.93	55.1214	1972.53	28.9448	1988.92	11.2656	1988.92	11.2656	98.3914
DOBB'S-110 <>	99.7112	96227.5	0.948409	7.96034	0.388662	6.28927	1.34612	0.363103	1.28879	0.957411	1996.87	22.1311	2016.96	11.7937	2037.57	6.873	2037.57	6.873	98.0022
DOBB'S-53 <>	174.5	64355.2	0.91682	7.726	0.402113	6.75262	3.00298	0.378378	2.97594	0.990994	2068.7	52.6635	2079.54	26.5647	2090.27	7.07057	2090.27	7.07057	98.9684
DOBB'S-67 <>	109.702	144245	1.02035	7.54969	0.279877	7.15252	1.62679	0.39164	1.60254	0.98509	2130.43	29.073	2130.61	14.493	2130.76	4.89892	2130.76	4.89892	99.9844
DOBB'S-40 <>	31.7141	37736.6	0.669409	5.51369	0.688369	12.8587	3.7585	0.514207	3.69492	0.983085	2674.57	80.8908	2669.35	35.4238	2665.39	11.4044	2665.39	11.4044	100.344
DOBB'S-113 <>	216.448	67479.6	1.44947	5.34923	0.224373	13.5211	2.1418	0.524568	2.13001	0.994498	2718.52	47.2458	2716.76	20.2525	2715.44	3.69979	2715.44	3.69979	100.114
DOBB'S-86 <>	38.3261	68495.5	1.00966	5.33931	0.596691	13.5018	1.14979	0.522848	0.982842	0.854801	2711.25	21.7531	2715.41	10.8701	2718.5	9.83635	2718.5	9.83635	99.7332
DOBB'S-5 <>	57.2204	76924.9	0.366155	5.30817	0.568274	13.8752	0.798406	0.534174	0.560819	0.702423	2759.01	12.5878	2741.22	7.56203	2728.14	9.35604	2728.14	9.35604	101.132
DOBB'S-99 <>	16.304	29431.9	1.69953	5.19661	1.4184	13.1162	4.40646	0.494341	4.17193	0.946777	2589.43	88.9734	2688.05	41.5961	2763.06	23.2839	2763.06	23.2839	93.7161
DOBB'S-8 <>	69.0954	103366	1.81844	5.10953	0.415015	14.5456	1.12394	0.539027	1.04451	0.92933	2779.38	23.5829	2785.98	10.6785	2790.76	6.79639	2790.76	6.79639	99.5921
DOBB'S-62 <>	43.5155	54633.6	0.609158	5.10675	0.31984	14.8745	1.47763	0.550915	1.4426	0.976293	2828.98	33.0343	2807.24	14.0594	2791.65	5.23735	2791.65	5.23735	101.337
DOBB'S-30 <>	18.6007	26114	2.35179	4.92526	1.73016	15.7448	2.1237	0.562425	1.23152	0.579894	2876.64	28.5778	2861.44	20.2786	2850.74	28.1786	2850.74	28.1786	100.909
DOBB'S-46 <>	15.2345	24737.3	1.38494	4.8305	1.09424	16.1244	1.74103	0.564902	1.3542	0.777812	2886.86	31.513	2884.2	16.6473	2882.33	17.7693	2882.33	17.7693	100.157
DOBB'S-103 <>	12.549	18735	2.16763	4.50157	1.24891	17.746	2.24873	0.57938	1.87003	0.831595	2946.22	44.2233	2976.07	21.6185	2996.29	20.0823	2996.29	20.0823	98.329
DOBB'S-43 <>	169.722	88520.2	1.81823	4.41297	0.147235	18.2189	5.98679	0.583111	5.98498	0.999698	2961.43	142.132	3001.36	57.6878	3028.21	2.36144	3028.21	2.36144	97.7946
DOBB'S-92 <>	48.3574	85366.2	0.871242	4.21037	0.315565	20.087	1.3417	0.613387	1.30407	0.971948	3083.55	31.9608	3095.56	12.9781	3103.34	5.03012	3103.34	5.03012	99.3623
Brazos River sandstone, sample 5 (Middle Pennsylvanian)
BRAZOS RIVER-65 <>	315.323	42258.9	1.32312	19.3468	1.99078	0.371084	2.22473	0.0520691	0.993086	0.446385	327.212	3.1684	320.456	6.11392	271.616	45.6343	327.212	3.1684	120
BRAZOS RIVER-18 <>	322.325	3951.21	1.1026	17.4789	13.0769	0.413043	13.1159	0.052361	1.01092	0.0770757	329.001	3.24249	351.064	38.9478	499.73	289.083	329.001	3.24249	65
BRAZOS RIVER-55 <>	432.926	82783	2.66174	18.4151	1.70535	0.419376	1.83086	0.0560114	0.666218	0.363883	351.323	2.27794	355.605	5.49283	383.626	38.3101	351.323	2.27794	91.6
BRAZOS RIVER-77 <>	729.046	4922.74	2.79585	16.5929	0.87485	0.524704	2.77256	0.0631447	2.63092	0.948913	394.722	10.0733	428.289	9.68844	613.138	18.9192	394.722	10.0733	64.4
BRAZOS RIVER-2 <>	106.905	9120.15	0.425285	18.2393	5.49145	0.481144	6.19233	0.0636474	2.86163	0.462125	397.769	11.0386	398.857	20.4277	405.146	123.018	397.769	11.0386	98.2
BRAZOS RIVER-90 <>	84.9377	10155.9	1.50117	18.6519	8.64275	0.482465	8.87797	0.0652659	2.03008	0.228665	407.571	8.01791	399.763	29.3458	354.859	195.515	407.571	8.01791	114.854
BRAZOS RIVER-35 <>	120.531	20877.8	1.74605	18.6335	4.00438	0.496984	5.39744	0.0671638	3.61901	0.670505	419.046	14.6829	409.659	18.1966	357.073	90.4351	419.046	14.6829	117.356
BRAZOS RIVER-87 <>	633.189	3126.85	3.14595	15.5859	1.44305	0.59625	3.33915	0.0674001	3.01123	0.901797	420.473	12.2573	474.851	12.6653	746.902	30.4969	420.473	12.2573	56.2956
BRAZOS RIVER-74 <>	309.76	38819.7	6.48913	17.3074	2.06251	0.560049	2.41251	0.0703001	1.25152	0.51876	437.963	5.29914	451.559	8.79425	521.368	45.2561	437.963	5.29914	84.0028
BRAZOS RIVER-118 <>	253.441	14474.5	0.821255	17.7849	2.49935	0.558343	2.88141	0.0720196	1.43379	0.4976	448.312	6.20942	450.448	10.4831	461.344	55.4132	448.312	6.20942	97.1751
BRAZOS RIVER-51 <>	158.788	29337.5	0.963309	17.3798	2.3427	0.578865	4.00071	0.0729663	3.24306	0.810621	454.002	14.2171	463.732	14.8947	512.201	51.4874	454.002	14.2171	88.6375
BRAZOS RIVER-8 <>	109.542	19169.5	1.32594	17.179	6.98314	0.609977	7.12988	0.0759993	1.43906	0.201835	472.199	6.55231	483.545	27.4354	537.72	152.977	472.199	6.55231	87.815
BRAZOS RIVER-114 <>	281.093	110680	1.45018	17.5932	1.16235	0.621961	1.34385	0.0793611	0.674443	0.501875	492.308	3.19672	491.076	5.23246	485.338	25.6449	492.308	3.19672	101.436
BRAZOS RIVER-81 <>	99.4098	16564.1	1.47444	18.2047	5.82972	0.633711	6.0173	0.0836708	1.49073	0.24774	517.997	7.41982	498.405	23.7043	409.386	130.487	517.997	7.41982	126.53
BRAZOS RIVER-104 <>	105.592	38781.4	1.4493	18.7091	2.74407	0.621218	3.79324	0.084294	2.61892	0.690418	521.702	13.1247	490.61	14.7596	347.919	62.0614	521.702	13.1247	149.95
BRAZOS RIVER-56 <>	150.272	53590.5	1.03425	17.9229	3.37664	0.671591	3.86697	0.0872997	1.88463	0.487364	539.547	9.75455	521.679	15.7765	444.176	75.0949	539.547	9.75455	121.471
BRAZOS RIVER-48 <>	322.856	118552	2.49552	17.0501	1.45406	0.715565	1.60227	0.0884858	0.673043	0.420056	546.576	3.52705	548.045	6.786	554.165	31.7482	546.576	3.52705	98.6305
BRAZOS RIVER-3 <>	20.7136	9320.81	2.17993	19.4392	27.5503	0.650523	28.2426	0.0917147	6.2151	0.220061	565.67	33.6589	508.801	113.496	260.733	643.606	565.67	33.6589	216.954
BRAZOS RIVER-32 <>	20.6941	4094.5	0.384087	21.6412	21.7747	0.591979	22.0055	0.092915	3.17864	0.144448	572.754	17.4205	472.131	83.2725	8.472	529.365	572.754	17.4205	6760.56
BRAZOS RIVER-22 <>	160.218	12828.3	0.508911	16.7526	1.67425	0.77168	3.22605	0.0937602	2.75759	0.854787	577.737	15.2386	580.726	14.2686	592.414	36.2889	577.737	15.2386	97.5225
BRAZOS RIVER-44 <>	202.485	11065.2	0.377949	16.5251	2.35107	0.788374	2.54909	0.0944874	0.985047	0.386431	582.022	5.48199	590.249	11.4106	621.987	50.7083	582.022	5.48199	93.5745
BRAZOS RIVER-102 <>	343.348	125162	5.35015	16.6001	1.78004	0.79402	4.57811	0.0955962	4.21788	0.921315	588.549	23.7249	593.449	20.5769	612.206	38.459	588.549	23.7249	96.1358
BRAZOS RIVER-83 <>	166.999	16800.7	1.51786	16.6138	2.77356	0.796655	3.05826	0.0959925	1.28856	0.421335	590.88	7.2753	594.94	13.7701	610.43	59.9444	590.88	7.2753	96.7973
BRAZOS RIVER-38 <>	125.724	65285.5	0.867306	16.5602	3.49556	0.810675	4.04216	0.097367	2.02981	0.50216	598.96	11.61	602.832	18.378	617.401	75.4966	598.96	11.61	97.0131
BRAZOS RIVER-110 <>	297.059	11004.4	3.48777	15.6201	3.71966	0.88319	4.37618	0.100054	2.30545	0.526817	614.728	13.5175	642.704	20.8423	742.275	78.6909	614.728	13.5175	82.8168
BRAZOS RIVER-59 <>	241.466	34120.7	2.32068	16.5042	1.69004	0.836144	1.89097	0.100086	0.848259	0.448583	614.913	4.97501	617.015	8.74379	624.714	36.4328	614.913	4.97501	98.4312
BRAZOS RIVER-105 <>	172.488	46850.5	1.42948	16.6268	1.84474	0.836312	2.24157	0.10085	1.27341	0.568088	619.387	7.52028	617.108	10.3662	608.737	39.8688	619.387	7.52028	101.75
BRAZOS RIVER-46 <>	296.964	64474.2	1.01619	16.4884	1.36355	0.85087	1.79921	0.101752	1.17384	0.652417	624.666	6.98849	625.126	8.39864	626.771	29.3903	624.666	6.98849	99.6641
BRAZOS RIVER-89 <>	80.7774	72407.1	2.40082	15.5672	5.33033	0.910249	5.39653	0.102771	0.842666	0.15615	630.628	5.06243	657.19	26.1162	749.439	112.671	630.628	5.06243	84.1467
BRAZOS RIVER-29 <>	283.412	11574.1	1.01823	16.4809	2.2438	0.873799	3.27083	0.104446	2.37984	0.727597	640.41	14.5082	637.628	15.4885	627.761	48.3657	640.41	14.5082	102.015
BRAZOS RIVER-53 <>	86.7692	11343.3	1.10675	15.3107	4.268	0.950216	5.31742	0.105515	3.17161	0.596457	646.65	19.5142	678.215	26.3128	784.445	89.6919	646.65	19.5142	82.4341
BRAZOS RIVER-21 <>	96.6217	22215.1	0.631502	16.4611	3.04077	0.884055	4.083	0.105545	2.72482	0.667357	646.823	16.7694	643.171	19.4558	630.387	65.5159	646.823	16.7694	102.607
BRAZOS RIVER-99 <>	161.554	55424.4	1.18203	16.2859	2.11165	0.896565	2.35969	0.105899	1.05312	0.446296	648.887	6.50089	649.89	11.327	653.355	45.3175	648.887	6.50089	99.3162
BRAZOS RIVER-36 <>	189.054	16701.6	2.62861	15.769	4.32273	0.982515	5.72231	0.112368	3.74951	0.655244	686.486	24.4168	694.894	28.8032	722.171	91.7574	686.486	24.4168	95.0587
BRAZOS RIVER-30 <>	133.578	49361.9	1.38866	15.3901	1.85814	1.04018	3.93313	0.116104	3.46653	0.881367	708.101	23.2465	724.006	20.3641	773.567	39.1018	708.101	23.2465	91.5371
BRAZOS RIVER-14 <>	57.448	21143.2	1.45519	13.8202	5.08893	1.68916	5.72096	0.16931	2.61386	0.456891	1008.31	24.3981	1004.45	36.504	996.047	103.454	996.047	103.454	101.231
BRAZOS RIVER-80 <>	40.2657	24859.4	2.25798	13.8023	3.80612	1.75659	5.19733	0.17584	3.53916	0.680958	1044.21	34.1187	1029.59	33.6409	998.644	77.3378	998.644	77.3378	104.563
BRAZOS RIVER-71 <>	142.899	33799	0.963075	13.791	1.0977	1.698	1.24204	0.169837	0.581135	0.467888	1011.21	5.43879	1007.78	7.93724	1000.3	22.2745	1000.3	22.2745	101.091
BRAZOS RIVER-4 <>	114.106	88312.6	1.89069	13.7772	2.7769	1.66571	3.13424	0.16644	1.45338	0.463709	992.466	13.3688	995.552	19.8886	1002.33	56.3918	1002.33	56.3918	99.0155
BRAZOS RIVER-78 <>	152.909	90113.1	2.29313	13.7364	1.22559	1.64871	1.31734	0.164254	0.48304	0.366678	980.376	4.39309	989.058	8.32622	1008.35	24.8397	1008.35	24.8397	97.2258
BRAZOS RIVER-112 <>	23.7031	12257.1	1.00167	13.6591	5.44149	1.82189	6.43896	0.180486	3.44243	0.534625	1069.63	33.9288	1053.36	42.2355	1019.79	110.272	1019.79	110.272	104.887
BRAZOS RIVER-94 <>	173.709	66615.4	3.44558	13.5806	1.13396	1.76301	1.78371	0.173649	1.37687	0.771911	1032.18	13.1324	1031.95	11.557	1031.45	22.9388	1031.45	22.9388	100.071
BRAZOS RIVER-39 <>	131.125	91023.9	1.91743	13.574	1.73205	1.73338	1.85294	0.170648	0.658313	0.35528	1015.68	6.18621	1021.01	11.9318	1032.43	35.0245	1032.43	35.0245	98.3777
BRAZOS RIVER-113 <>	216.563	107758	2.35235	13.5642	0.599463	1.75376	0.882007	0.172529	0.646978	0.733529	1026.03	6.13687	1028.55	5.70362	1033.89	12.1313	1033.89	12.1313	99.2397
BRAZOS RIVER-64 <>	113.625	97252	2.09058	13.5613	3.16734	1.59858	4.23641	0.157229	2.81338	0.664095	941.359	24.6412	969.655	26.4682	1034.33	63.9931	1034.33	63.9931	91.0117
BRAZOS RIVER-41 <>	124.474	7868.41	1.7223	13.5611	1.38247	1.54578	3.41622	0.152034	3.12399	0.914459	912.357	26.577	948.81	21.0651	1034.34	27.9498	1034.34	27.9498	88.2063
BRAZOS RIVER-95 <>	132.489	23790.6	1.23357	13.4141	1.56651	1.85507	1.82745	0.180477	0.941073	0.514965	1069.58	9.27484	1065.24	12.057	1056.37	31.5636	1056.37	31.5636	101.251
BRAZOS RIVER-31 <>	56.1054	17544.5	1.73502	13.4095	2.82385	1.81179	4.36012	0.176206	3.32212	0.761934	1046.21	32.083	1049.73	28.5343	1057.06	56.8665	1057.06	56.8665	98.974
BRAZOS RIVER-26 <>	275.973	15069.9	1.13845	13.4022	0.750632	1.82949	2.46732	0.17783	2.35037	0.952599	1055.11	22.8759	1056.1	16.2	1058.17	15.1305	1058.17	15.1305	99.711
BRAZOS RIVER-15 <>	114.371	21244.8	1.52687	13.3626	3.42081	1.8898	6.30131	0.18315	5.29193	0.839815	1084.16	52.8091	1077.51	41.8653	1064.11	68.8101	1064.11	68.8101	101.884
BRAZOS RIVER-54 <>	167.072	102320	2.53287	13.3592	1.03389	1.87299	3.45311	0.181474	3.2947	0.954125	1075.02	32.6233	1071.59	22.8621	1064.62	20.8119	1064.62	20.8119	100.977
BRAZOS RIVER-86 <>	118.608	55691.1	1.0855	13.3159	1.1707	1.8998	2.5459	0.183475	2.26077	0.888004	1085.93	22.5941	1081.02	16.9376	1071.15	23.5218	1071.15	23.5218	101.38
BRAZOS RIVER-62 <>	110.269	79640.6	1.15223	13.2743	1.35217	1.91278	3.54753	0.184152	3.27972	0.92451	1089.62	32.8797	1085.55	23.6587	1077.39	27.1426	1077.39	27.1426	101.135
BRAZOS RIVER-50 <>	99.5422	89729.1	2.72072	13.2743	1.37026	1.96478	1.56551	0.189158	0.757112	0.483619	1116.81	7.76361	1103.52	10.5347	1077.42	27.487	1077.42	27.487	103.656
BRAZOS RIVER-109 <>	83.8177	70449.1	0.675526	13.2432	1.75247	1.80696	1.97692	0.173557	0.914904	0.462793	1031.68	8.72231	1047.98	12.9228	1082.11	35.1536	1082.11	35.1536	95.3393
BRAZOS RIVER-24 <>	21.5248	14596.4	0.912517	13.0543	9.32329	2.0355	9.76375	0.192718	2.89949	0.296965	1136.08	30.2015	1127.46	66.5747	1110.86	186.593	1110.86	186.593	102.271
BRAZOS RIVER-1 <>	75.364	29775.4	1.27661	12.9792	1.98162	2.12227	2.45889	0.199778	1.45578	0.592051	1174.12	15.6265	1156.08	16.9722	1122.39	39.5151	1122.39	39.5151	104.609
BRAZOS RIVER-120 <>	76.5885	111678	2.42655	12.9384	1.89681	2.07436	2.17474	0.194654	1.06376	0.489144	1146.54	11.1733	1140.37	14.9004	1128.69	37.7879	1128.69	37.7879	101.581
BRAZOS RIVER-101 <>	205.821	19386.3	1.58877	12.922	1.28346	1.90268	2.84134	0.178318	2.53495	0.892165	1057.78	24.7299	1082.03	18.9134	1131.21	25.5592	1131.21	25.5592	93.5089
BRAZOS RIVER-93 <>	71.4227	48512.8	2.04481	12.8006	2.66555	2.10141	3.17165	0.195093	1.71877	0.541918	1148.91	18.0875	1149.27	21.824	1149.96	52.9346	1149.96	52.9346	99.9084
BRAZOS RIVER-33 <>	69.9901	59834.7	1.51966	12.5615	1.94244	2.20336	2.2153	0.200737	1.06513	0.480807	1179.28	11.4789	1182.11	15.4731	1187.31	38.3482	1187.31	38.3482	99.3231
BRAZOS RIVER-125 <>	186.872	122674	1.79872	12.4824	0.935877	2.28715	1.31213	0.207058	0.919682	0.700908	1213.12	10.17	1208.33	9.27029	1199.76	18.4423	1199.76	18.4423	101.114
BRAZOS RIVER-124 <>	169.982	11751.1	2.04376	12.3297	0.867765	2.12995	2.14175	0.190468	1.95808	0.914243	1123.91	20.1955	1158.57	14.8	1223.97	17.0339	1223.97	17.0339	91.825
BRAZOS RIVER-20 <>	204.321	36863.6	2.3999	11.8731	0.873458	2.54939	2.14972	0.219533	1.96427	0.913734	1279.4	22.7943	1286.26	15.6794	1297.72	16.9801	1297.72	16.9801	98.589
BRAZOS RIVER-96 <>	99.4214	13730.5	2.59898	11.7213	1.4099	2.49577	2.35724	0.212169	1.88911	0.80141	1240.36	21.3155	1270.81	17.0898	1322.68	27.3145	1322.68	27.3145	93.7763
BRAZOS RIVER-76 <>	128.19	59927.2	1.47505	11.6836	0.596185	2.67829	1.02254	0.226952	0.830756	0.812442	1318.5	9.90599	1322.48	7.56015	1328.92	11.5393	1328.92	11.5393	99.2162
BRAZOS RIVER-6 <>	47.0362	14441.1	0.741391	11.6214	2.13828	2.80574	3.31058	0.236487	2.52739	0.763427	1368.41	31.161	1357.07	24.7873	1339.24	41.3316	1339.24	41.3316	102.178
BRAZOS RIVER-121 <>	121.299	53480	1.63442	11.4935	0.990934	2.68536	1.17431	0.223849	0.63013	0.536594	1302.18	7.42978	1324.43	8.68856	1360.6	19.0962	1360.6	19.0962	95.7065
BRAZOS RIVER-84 <>	472.56	5417.4	0.957324	11.4421	0.530878	2.50093	1.31724	0.207542	1.20553	0.91519	1215.71	13.3567	1272.31	9.55491	1369.24	10.2182	1369.24	10.2182	88.7872
BRAZOS RIVER-73 <>	79.0623	11703.8	1.00056	11.3643	2.88646	2.50785	2.98425	0.206701	0.757684	0.253894	1211.22	8.36661	1274.31	21.6666	1382.36	55.4651	1382.36	55.4651	87.6196
BRAZOS RIVER-117 <>	38.7378	21972.6	1.74873	10.9292	3.87742	3.13096	5.96128	0.248179	4.52797	0.759563	1429.08	58.0392	1440.33	45.9084	1456.97	73.7628	1456.97	73.7628	98.0856
BRAZOS RIVER-11 <>	100.745	105842	2.28256	10.5753	1.17122	3.51187	1.83411	0.269357	1.41145	0.769559	1537.54	19.3077	1529.89	14.4966	1519.31	22.0875	1519.31	22.0875	101.2
BRAZOS RIVER-23 <>	55.5593	18181.8	1.05658	10.4561	1.65225	3.09972	2.67029	0.235066	2.09775	0.785587	1361	25.7379	1432.62	20.5029	1540.66	31.0729	1540.66	31.0729	88.3387
BRAZOS RIVER-52 <>	55.9882	33196.1	1.49747	10.2433	1.83665	3.64968	2.24359	0.271139	1.28858	0.574336	1546.58	17.7185	1560.44	17.8834	1579.23	34.367	1579.23	34.367	97.9327
BRAZOS RIVER-19 <>	61.22	50329.2	1.39145	10.1789	1.6726	3.71209	1.97643	0.274043	1.05295	0.532753	1561.29	14.6003	1573.98	15.8107	1591.01	31.247	1591.01	31.247	98.1318
BRAZOS RIVER-25 <>	128.886	76115.2	1.84969	9.89078	0.674175	3.88672	0.890879	0.278813	0.58237	0.653702	1585.38	8.18509	1610.93	7.19485	1644.47	12.5086	1644.47	12.5086	96.407
BRAZOS RIVER-100 <>	91.4421	42724.8	0.903368	9.87562	0.96732	4.0779	1.38942	0.292079	0.997381	0.717842	1651.91	14.5342	1649.89	11.3301	1647.31	17.9396	1647.31	17.9396	100.279
BRAZOS RIVER-7 <>	217.515	90936.3	2.38858	9.86858	0.299492	4.09353	1.42744	0.292989	1.39567	0.977742	1656.45	20.3873	1653.01	11.649	1648.64	5.55375	1648.64	5.55375	100.474
BRAZOS RIVER-40 <>	34.2904	47499.4	2.01703	9.76023	1.93425	4.17079	2.35605	0.295241	1.34524	0.570972	1667.67	19.7672	1668.3	19.2987	1669.08	35.7748	1669.08	35.7748	99.9155
BRAZOS RIVER-97 <>	224.241	291476	4.66239	9.37061	0.433071	4.61402	2.2096	0.313579	2.16675	0.980605	1758.29	33.3442	1751.81	18.4415	1744.06	7.93277	1744.06	7.93277	100.816
BRAZOS RIVER-47 <>	350.81	113435	1.44845	9.28526	0.284251	4.24792	1.76701	0.286068	1.744	0.986976	1621.85	25.0076	1683.33	14.524	1760.81	5.19706	1760.81	5.19706	92.1083
BRAZOS RIVER-5 <>	87.4461	92244.3	1.78972	9.22345	0.455508	4.88072	2.19058	0.326495	2.14269	0.978142	1821.37	33.998	1798.93	18.4625	1773.01	8.31381	1773.01	8.31381	102.728
BRAZOS RIVER-107 <>	177.897	45892.1	1.99162	8.70061	0.381645	5.28029	3.22809	0.333201	3.20545	0.992987	1853.88	51.6449	1865.68	27.5652	1878.84	6.87788	1878.84	6.87788	98.6713
BRAZOS RIVER-68 <>	164.826	38463.2	1.53796	7.88057	0.474764	6.68622	0.692651	0.382153	0.504346	0.728138	2086.33	8.98934	2070.8	6.11812	2055.37	8.38115	2055.37	8.38115	101.506
BRAZOS RIVER-72 <>	175.582	54583.4	1.66763	7.79053	0.352054	6.60371	0.644379	0.373124	0.539705	0.83756	2044.08	9.45407	2059.84	5.68248	2075.63	6.19843	2075.63	6.19843	98.4802
BRAZOS RIVER-43 <>	101.156	65962.9	1.55509	7.77879	0.736992	6.52063	2.2519	0.367875	2.12789	0.944929	2019.39	36.8914	2048.69	19.8276	2078.29	12.9745	2078.29	12.9745	97.1663
BRAZOS RIVER-91 <>	308.389	269074	8.31544	6.23533	0.238084	9.97952	2.23283	0.451303	2.2201	0.994299	2401.04	44.5048	2432.89	20.6097	2459.62	4.02441	2459.62	4.02441	97.6185
BRAZOS RIVER-34 <>	45.0924	35259.7	0.868483	5.40587	0.475803	11.9625	1.41277	0.469014	1.33024	0.941581	2479.23	27.3786	2601.47	13.2392	2698.06	7.85873	2698.06	7.85873	91.8896
BRAZOS RIVER-92 <>	215.113	218673	1.16436	5.2082	0.210687	12.316	0.811259	0.465219	0.783423	0.965688	2462.56	16.0351	2628.8	7.61892	2759.4	3.46005	2759.4	3.46005	89.2427
BRAZOS RIVER-60 <>	44.7129	110926	0.998554	5.13217	0.687616	14.2839	1.17395	0.531676	0.951497	0.810508	2748.51	21.2916	2768.75	11.1406	2783.52	11.2642	2783.52	11.2642	98.7425
BRAZOS RIVER-66 <>	72.6106	82780	0.627344	5.02129	0.362867	15.1587	1.53301	0.552049	1.48944	0.971582	2833.69	34.1521	2825.26	14.6036	2819.25	5.92682	2819.25	5.92682	100.512
BRAZOS RIVER-49 <>	452.949	444996	10.5057	4.79961	0.225897	16.1692	2.77618	0.562851	2.76697	0.996684	2878.4	64.2411	2886.85	26.5531	2892.74	3.66576	2892.74	3.66576	99.5042
Lake Pinto sandstone, sample 6 (Middle Pennsylvanian)
LAKE PINTO-108 <>	209.581	134515	3.74278	17.812	1.81357	0.516297	2.16	0.0666976	1.17328	0.543184	416.229	4.7292	422.674	7.46804	457.988	40.2296	416.229	4.7292	90.882
LAKE PINTO-111 <>	13.0902	4402.25	1.44576	28.4773	89.0476	0.327574	89.5345	0.0676561	9.32393	0.104138	422.019	38.0888	287.712	228.082	-699.449	3273.51	422.019	38.0888	NA
LAKE PINTO-14 <>	154.663	32001.7	5.76735	17.6031	4.16923	0.551878	4.76311	0.0704579	2.30321	0.483552	438.914	9.77266	446.226	17.2008	484.12	92.1146	438.914	9.77266	90.6622
LAKE PINTO-121 <>	263.909	36332.4	2.6238	17.7211	2.39969	0.581435	2.93361	0.0747292	1.68748	0.575222	464.585	7.56394	465.383	10.9522	469.343	53.1303	464.585	7.56394	98.9863
LAKE PINTO-104 <>	133.667	43976.1	1.83588	17.6187	4.29466	0.595626	4.79274	0.0761107	2.1275	0.443901	472.866	9.70012	474.454	18.1678	482.161	94.9068	472.866	9.70012	98.0722
LAKE PINTO-79 <>	162.256	85862.4	0.974248	17.2638	1.33202	0.633745	2.65449	0.0793503	2.29609	0.864984	492.243	10.8816	498.426	10.4558	526.94	29.211	492.243	10.8816	93.4155
LAKE PINTO-12 <>	156.97	95155.7	2.2077	17.1352	2.10867	0.647302	5.69737	0.0804442	5.29279	0.928987	498.774	25.4037	506.817	22.7358	543.302	46.0996	498.774	25.4037	91.8042
LAKE PINTO-34 <>	77.6399	69545.4	0.61167	18.7816	6.08322	0.599632	6.38146	0.0816799	1.92809	0.302139	506.142	9.3856	477	24.2939	339.175	137.882	506.142	9.3856	149.228
LAKE PINTO-53 <>	28.0682	24848.7	1.29776	16.0832	11.272	0.713317	11.6793	0.083206	3.0574	0.261779	515.231	15.1396	546.714	49.4123	680.167	241.522	515.231	15.1396	75.7506
LAKE PINTO-60 <>	278.326	76934.7	1.52332	17.1376	1.78996	0.692823	2.03877	0.0861135	0.976017	0.478729	532.51	4.98852	534.495	8.47263	542.952	39.1501	532.51	4.98852	98.0769
LAKE PINTO-58 <>	198.387	73621.1	2.09051	17.4739	1.83325	0.687553	5.05647	0.0871352	4.71244	0.931962	538.572	24.3487	531.329	20.9212	500.365	40.3622	538.572	24.3487	107.636
LAKE PINTO-41 <>	29.1437	16079.8	1.34209	17.6266	21.0081	0.681742	21.382	0.0871542	3.98116	0.186192	538.685	20.5744	527.827	88.2329	481.122	468.792	538.685	20.5744	111.964
LAKE PINTO-46 <>	135.942	14630.2	4.42325	16.7818	2.24802	0.716857	3.19765	0.087251	2.27406	0.711167	539.259	11.7642	548.81	13.5577	588.656	48.7699	539.259	11.7642	91.6085
LAKE PINTO-119 <>	296.878	124077	3.99514	17.2231	1.23057	0.705236	3.10443	0.0880935	2.85012	0.918081	544.252	14.8751	541.913	13.0372	532.108	26.9534	544.252	14.8751	102.282
LAKE PINTO-83 <>	95.4854	38748	2.19869	17.0036	4.06326	0.717048	5.43283	0.0884278	3.60632	0.663801	546.232	18.8874	548.923	23.0407	560.114	88.5913	546.232	18.8874	97.5216
LAKE PINTO-61 <>	316.83	107025	1.86848	17.0913	1.23136	0.715709	1.81596	0.0887179	1.33472	0.734993	547.95	7.01139	548.131	7.69197	548.901	26.8917	547.95	7.01139	99.8269
LAKE PINTO-25 <>	91.5001	94797.7	2.392	16.5134	3.96966	0.747161	4.21735	0.0894848	1.42401	0.337656	552.489	7.53981	566.576	18.3146	623.513	85.6603	552.489	7.53981	88.6091
LAKE PINTO-80 <>	253.257	16090.7	3.17628	16.6128	3.16551	0.745114	3.50172	0.0897769	1.49718	0.427556	554.218	7.95096	565.386	15.1825	610.553	68.4302	554.218	7.95096	90.7731
LAKE PINTO-89 <>	107.015	68973.5	0.328099	17.7084	3.02933	0.701691	3.65598	0.0901207	2.04678	0.559845	556.251	10.9079	539.8	15.3085	470.926	67.0708	556.251	10.9079	118.119
LAKE PINTO-48 <>	223.404	73406.3	2.45187	16.9153	1.88484	0.743428	2.89461	0.0912047	2.19685	0.758944	562.658	11.8367	564.404	12.5337	571.427	40.9874	562.658	11.8367	98.4655
LAKE PINTO-100 <>	87.0711	60525.8	1.01629	16.5985	3.4495	0.758391	4.19537	0.0912981	2.3879	0.569175	563.209	12.8782	573.081	18.3749	612.412	74.5442	563.209	12.8782	91.9658
LAKE PINTO-65 <>	105.52	83714.4	0.556948	16.8473	3.7359	0.763001	3.93202	0.0932294	1.22629	0.311873	574.608	6.74145	575.74	17.2806	580.229	81.1591	574.608	6.74145	99.0312
LAKE PINTO-42 <>	161.711	89436.2	1.72285	17.1685	2.96804	0.755087	3.47678	0.0940216	1.81073	0.520807	579.278	10.0317	571.172	15.1893	539.015	64.929	579.278	10.0317	107.47
LAKE PINTO-93 <>	134.41	42028.2	6.02757	15.9838	1.89785	0.855489	4.1463	0.099173	3.68645	0.889095	609.561	21.4415	627.657	19.4133	693.4	40.462	609.561	21.4415	87.909
LAKE PINTO-116 <>	385.873	161599	6.70565	16.5556	0.703843	0.83544	1.42685	0.100314	1.24117	0.869868	616.246	7.29447	616.626	6.59462	618	15.2143	616.246	7.29447	99.7162
LAKE PINTO-82 <>	455.462	37779.4	2.63071	16.3155	0.899721	0.848259	1.39332	0.100376	1.06389	0.76356	616.611	6.25607	623.693	6.49312	649.479	19.305	616.611	6.25607	94.9393
LAKE PINTO-57 <>	40.8597	54565.7	1.11325	15.4605	6.99343	0.900253	7.92335	0.100945	3.72444	0.470058	619.946	22.0141	651.863	38.1326	763.96	147.57	619.946	22.0141	81.149
LAKE PINTO-49 <>	89.3656	43839.7	0.845755	16.2858	2.52503	0.870544	2.88261	0.102825	1.39057	0.482398	630.944	8.35801	635.863	13.6228	653.384	54.203	630.944	8.35801	96.5655
LAKE PINTO-67 <>	289.759	36458.7	1.5238	16.0899	1.24892	0.887892	4.71938	0.103613	4.55112	0.964348	635.546	27.5445	645.236	22.5408	679.28	26.698	635.546	27.5445	93.5617
LAKE PINTO-87 <>	97.8609	41071.6	1.77936	16.1963	2.96814	0.891367	3.44533	0.104706	1.74942	0.507766	641.927	10.689	647.103	16.4884	665.228	63.6017	641.927	10.689	96.4973
LAKE PINTO-1 <>	405.062	324617	7.11574	16.4027	0.932361	0.897267	1.26688	0.106742	0.857724	0.677036	653.798	5.33279	650.266	6.08365	638.044	20.077	653.798	5.33279	102.469
LAKE PINTO-113 <>	188.366	326566	1.35665	16.3057	1.01326	0.923454	2.51338	0.109207	2.30008	0.915135	668.144	14.5983	664.185	12.253	650.769	21.7622	668.144	14.5983	102.67
LAKE PINTO-47 <>	32.6599	22951.1	1.63733	15.1544	6.26466	1.06386	7.3911	0.116929	3.92204	0.530643	712.865	26.4685	735.725	38.7038	805.953	131.253	712.865	26.4685	88.4498
LAKE PINTO-120 <>	89.5549	44193.7	1.09216	15.7952	3.41961	1.04702	5.5074	0.119944	4.31714	0.78388	730.244	29.8058	727.407	28.6105	718.651	72.5983	730.244	29.8058	101.613
LAKE PINTO-3 <>	371.556	213379	1.87337	15.8348	0.682712	1.04737	1.32511	0.120285	1.1357	0.857062	732.205	7.86077	727.58	6.88322	713.375	14.4922	732.205	7.86077	102.64
LAKE PINTO-26 <>	172.44	87083.3	2.25656	14.7544	1.00973	1.15454	3.98695	0.123546	3.85697	0.967398	750.941	27.3404	779.385	21.6966	861.709	20.9701	750.941	27.3404	87.1455
LAKE PINTO-102 <>	69.3882	33811.8	1.42575	14.3611	3.45286	1.26264	3.89701	0.131512	1.80677	0.463629	796.484	13.5371	829.091	22.0848	917.557	71.0387	796.484	13.5371	86.8048
LAKE PINTO-115 <>	208.593	135500	2.81681	15.3043	0.821507	1.18691	1.67628	0.131744	1.46118	0.871679	797.808	10.9649	794.527	9.23796	785.317	17.2536	797.808	10.9649	101.591
LAKE PINTO-94 <>	122.268	55263.4	1.35028	14.592	1.65499	1.29462	3.52088	0.13701	3.10767	0.88264	827.735	24.1404	843.342	20.173	884.648	34.2206	827.735	24.1404	93.5666
LAKE PINTO-77 <>	39.7792	67446.7	2.11808	14.4542	5.46184	1.46793	5.86856	0.153886	2.14668	0.365794	922.709	18.4554	917.278	35.4577	904.214	112.65	904.214	112.65	102.045
LAKE PINTO-95 <>	290.591	147043	6.56716	14.3826	1.33485	1.47792	2.18373	0.154165	1.72825	0.791421	924.27	14.8814	921.376	13.2256	914.473	27.4888	914.473	27.4888	101.071
LAKE PINTO-54 <>	46.3699	33775.9	1.10271	14.1955	3.2855	1.45893	3.78091	0.150206	1.87105	0.494866	902.116	15.7512	913.569	22.7818	941.361	67.3297	941.361	67.3297	95.8311
LAKE PINTO-17 <>	174.056	216725	2.7533	14.0159	0.957341	1.47287	3.33715	0.149721	3.19689	0.957968	899.401	26.8373	919.307	20.1849	967.37	19.5529	967.37	19.5529	92.9738
LAKE PINTO-75 <>	41.7494	39467.4	2.06969	13.9219	3.52378	1.55943	4.90993	0.157458	3.41912	0.696369	942.635	29.9844	954.242	30.3849	981.122	71.8095	981.122	71.8095	96.0773
LAKE PINTO-45 <>	52.3027	43773.1	3.15782	13.8889	3.41173	1.58026	5.85251	0.159182	4.7552	0.812507	952.228	42.0954	962.471	36.4102	985.957	69.4544	985.957	69.4544	96.579
LAKE PINTO-23 <>	59.5267	40285.8	0.53847	13.875	3.5729	1.73456	4.20273	0.174551	2.21298	0.526559	1037.14	21.2006	1021.45	27.0748	987.997	72.7151	987.997	72.7151	104.974
LAKE PINTO-8 <>	65.2674	73276.1	1.93186	13.8676	1.79916	1.69605	3.81253	0.170584	3.36131	0.881648	1015.33	31.5766	1007.04	24.3577	989.046	36.5891	989.046	36.5891	102.657
LAKE PINTO-105 <>	215.105	128102	0.972853	13.7663	1.33361	1.5231	3.01282	0.15207	2.70159	0.896697	912.556	22.9881	939.725	18.4691	1003.94	27.0673	1003.94	27.0673	90.897
LAKE PINTO-9 <>	90.0159	63317.9	1.85666	13.7465	1.85165	1.75236	7.97877	0.174708	7.76094	0.972698	1038	74.4105	1028.03	51.6247	1006.86	37.5564	1006.86	37.5564	103.092
LAKE PINTO-106 <>	97.3172	93437.4	3.303	13.6114	1.47052	1.71247	2.10339	0.169055	1.50394	0.715005	1006.9	14.0198	1013.21	13.4845	1026.86	29.7628	1026.86	29.7628	98.0561
LAKE PINTO-114 <>	254.724	273700	2.56771	13.5533	0.709981	1.72366	1.82624	0.169432	1.68259	0.921337	1008.98	15.7151	1017.39	11.7356	1035.51	14.3603	1035.51	14.3603	97.4378
LAKE PINTO-29 <>	96.9509	109726	1.28148	13.5387	2.09616	1.74722	2.48752	0.171563	1.33934	0.538425	1020.72	12.6435	1026.13	16.0652	1037.69	42.3502	1037.69	42.3502	98.3647
LAKE PINTO-44 <>	240.354	206527	3.91956	13.5207	0.627506	1.78408	3.36102	0.17495	3.30192	0.982417	1039.33	31.6945	1039.67	21.8726	1040.37	12.6845	1040.37	12.6845	99.8997
LAKE PINTO-6 <>	174.116	222336	2.63205	13.5022	1.3032	1.77701	2.73061	0.174018	2.39957	0.878765	1034.21	22.9283	1037.09	17.7438	1043.14	26.3122	1043.14	26.3122	99.1437
LAKE PINTO-97 <>	162.617	166055	2.0965	13.4877	0.77495	1.8132	1.33202	0.177371	1.08339	0.813344	1052.59	10.5214	1050.23	8.71761	1045.34	15.6491	1045.34	15.6491	100.694
LAKE PINTO-31 <>	85.294	82554.4	0.735545	13.4805	1.49233	1.88834	3.36328	0.184623	3.01407	0.896169	1092.18	30.2817	1077	22.3303	1046.42	30.116	1046.42	30.116	104.373
LAKE PINTO-30 <>	142.516	251344	2.00839	13.4426	1.07156	1.78442	2.16912	0.173972	1.88596	0.869458	1033.96	18.0166	1039.79	14.1158	1052.1	21.6111	1052.1	21.6111	98.2757
LAKE PINTO-99 <>	175.709	144893	1.37608	13.429	0.889998	1.81979	2.86145	0.177242	2.71952	0.9504	1051.89	26.3945	1052.61	18.753	1054.13	17.9471	1054.13	17.9471	99.7871
LAKE PINTO-69 <>	178.034	284410	1.44484	13.4146	0.302802	1.8459	0.700675	0.179591	0.631867	0.901798	1064.74	6.2015	1061.97	4.61464	1056.3	6.09711	1056.3	6.09711	100.799
LAKE PINTO-13 <>	39.7343	40587.7	1.04937	13.3849	3.92883	1.75635	5.48248	0.1705	3.82385	0.697468	1014.87	35.9069	1029.5	35.4863	1060.76	79.0799	1060.76	79.0799	95.6741
LAKE PINTO-117 <>	197.73	153019	1.21814	13.3774	0.751649	1.86374	2.51816	0.180824	2.40336	0.954412	1071.47	23.7252	1068.32	16.6419	1061.89	15.1224	1061.89	15.1224	100.902
LAKE PINTO-124 <>	198.075	227752	2.16559	13.2794	0.710779	1.87028	1.6166	0.180128	1.45196	0.898157	1067.67	14.2865	1070.63	10.6962	1076.67	14.2501	1076.67	14.2501	99.1646
LAKE PINTO-84 <>	96.2017	99687.9	2.14442	13.2582	2.27167	1.88884	3.41376	0.181626	2.54819	0.746447	1075.85	25.2494	1077.17	22.6677	1079.83	45.5937	1079.83	45.5937	99.6313
LAKE PINTO-5 <>	155.37	49277.4	2.03349	13.2566	0.920534	1.84594	1.82868	0.17748	1.58009	0.86406	1053.19	15.3531	1061.98	12.0442	1080.07	18.4703	1080.07	18.4703	97.5119
LAKE PINTO-27 <>	62.1785	46030.1	3.04343	12.9326	1.9071	2.05194	3.35683	0.192465	2.76248	0.822942	1134.71	28.7425	1132.94	22.9204	1129.55	37.9876	1129.55	37.9876	100.457
LAKE PINTO-103 <>	46.5667	35057.7	2.04624	12.9157	3.20848	2.05341	4.32199	0.19235	2.89573	0.669999	1134.09	30.114	1133.43	29.5207	1132.18	63.8772	1132.18	63.8772	100.169
LAKE PINTO-16 <>	45.2508	139168	0.864527	12.8925	3.69105	2.16287	5.22184	0.202239	3.69374	0.707364	1187.34	40.0557	1169.19	36.2733	1135.73	73.4548	1135.73	73.4548	104.544
LAKE PINTO-125 <>	74.5999	78044.7	1.18215	12.763	1.62054	2.12494	2.35377	0.196697	1.70707	0.72525	1157.55	18.0878	1156.94	16.2531	1155.78	32.1735	1155.78	32.1735	100.153
LAKE PINTO-123 <>	30.2391	24287	1.3525	12.708	3.57661	2.22214	4.0035	0.204809	1.79885	0.449319	1201.1	19.7126	1188.04	28.0419	1164.34	70.8959	1164.34	70.8959	103.157
LAKE PINTO-11 <>	148.508	176235	2.49144	12.6888	1.13219	2.15853	1.82993	0.198646	1.43763	0.78562	1168.04	15.3587	1167.8	12.6987	1167.34	22.4264	1167.34	22.4264	100.06
LAKE PINTO-40 <>	64.7387	6658.33	2.48594	12.6731	2.87775	2.27287	3.07089	0.208908	1.07188	0.349046	1223	11.9407	1203.91	21.6574	1169.79	56.9911	1169.79	56.9911	104.549
LAKE PINTO-91 <>	64.5688	107182	1.09917	12.5859	3.26495	2.13487	3.36837	0.194875	0.828269	0.245896	1147.73	8.70811	1160.17	23.2958	1183.48	64.5278	1183.48	64.5278	96.9792
LAKE PINTO-66 <>	100.048	21028.5	1.49459	12.5404	2.84151	2.13462	8.99676	0.194146	8.53624	0.948813	1143.8	89.4714	1160.08	62.2868	1190.64	56.1079	1190.64	56.1079	96.0653
LAKE PINTO-55 <>	114.824	46050.5	2.16375	12.5081	1.03237	2.20788	2.76346	0.200293	2.56338	0.927598	1176.89	27.5747	1183.54	19.3149	1195.69	20.3644	1195.69	20.3644	98.4277
LAKE PINTO-39 <>	56.2838	32424.6	1.5796	12.436	1.90448	2.23298	2.15346	0.201403	1.00515	0.466763	1182.85	10.8625	1191.46	15.1036	1207.12	37.5098	1207.12	37.5098	97.9895
LAKE PINTO-92 <>	14.0115	11255.8	0.772753	12.2786	5.86259	2.33973	6.09257	0.208361	1.65816	0.272161	1220.08	18.4317	1224.44	43.366	1232.15	115.116	1232.15	115.116	99.02
LAKE PINTO-73 <>	120.325	101517	2.18859	12.2476	1.10145	2.34071	1.67525	0.207921	1.26225	0.75347	1217.73	14.0063	1224.74	11.919	1237.12	21.5978	1237.12	21.5978	98.4324
LAKE PINTO-35 <>	85.9569	131377	2.63404	11.8049	1.2444	2.62425	3.16082	0.224681	2.90556	0.919241	1306.56	34.3633	1307.45	23.243	1308.9	24.1542	1308.9	24.1542	99.8211
LAKE PINTO-21 <>	331.38	22360.7	3.08097	11.4639	2.11534	2.5064	6.30863	0.208392	5.94341	0.942108	1220.25	66.0758	1273.89	45.8193	1365.57	40.7381	1365.57	40.7381	89.3578
LAKE PINTO-68 <>	122.113	81409.4	3.32797	11.1494	1.10461	2.97083	3.23638	0.240231	3.04204	0.939951	1387.9	37.9852	1400.19	24.5907	1418.94	21.1154	1418.94	21.1154	97.8126
LAKE PINTO-71 <>	132.049	252280	1.86443	10.9902	0.578353	3.15304	0.802114	0.251323	0.555784	0.692898	1445.29	7.19593	1445.74	6.18351	1446.38	11.0144	1446.38	11.0144	99.9246
LAKE PINTO-33 <>	33.1428	34296.8	1.78381	10.9884	1.79412	2.94834	3.2067	0.234968	2.65783	0.828836	1360.49	32.5989	1394.42	24.3184	1446.7	34.169	1446.7	34.169	94.0407
LAKE PINTO-22 <>	47.0916	54597.7	1.91392	10.9404	2.54782	3.15719	3.70601	0.250515	2.6913	0.7262	1441.13	34.756	1446.76	28.5859	1455.02	48.4725	1455.02	48.4725	99.0459
LAKE PINTO-78 <>	93.8008	91946.5	0.882094	10.5674	1.02276	3.5055	3.02788	0.268669	2.84992	0.941225	1534.04	38.9068	1528.46	23.9252	1520.71	19.2839	1520.71	19.2839	100.877
LAKE PINTO-101 <>	91.9266	102037	0.923946	10.545	0.94894	3.50865	1.31356	0.268341	0.908273	0.691457	1532.38	12.3876	1529.17	10.3798	1524.71	17.8824	1524.71	17.8824	100.503
LAKE PINTO-59 <>	242.062	13341.7	1.47231	10.3699	0.34985	3.31066	1.81952	0.248994	1.78557	0.981341	1433.29	22.947	1483.57	14.1901	1556.2	6.56588	1556.2	6.56588	92.1018
LAKE PINTO-118 <>	62.01	99628.1	1.38653	9.95958	1.8389	4.14415	4.63882	0.299347	4.25877	0.918071	1688.07	63.2509	1663.06	37.9631	1631.59	34.1746	1631.59	34.1746	103.461
LAKE PINTO-43 <>	440.231	30397.8	2.06978	9.9239	2.40825	3.84746	3.2575	0.276921	2.19354	0.673382	1575.83	30.6661	1602.74	26.2586	1638.26	44.7211	1638.26	44.7211	96.1893
LAKE PINTO-50 <>	265.94	25910.9	3.06143	9.91324	0.743479	3.59877	3.78978	0.258743	3.71614	0.980568	1483.41	49.2436	1549.26	30.122	1640.26	13.802	1640.26	13.802	90.4374
LAKE PINTO-28 <>	131.695	217382	1.34034	9.49855	0.435643	4.54325	0.942017	0.312985	0.835232	0.886642	1755.38	12.8348	1738.93	7.8397	1719.18	8.00657	1719.18	8.00657	102.106
LAKE PINTO-81 <>	40.0061	5752.86	0.810653	9.4956	2.23864	4.25686	3.38796	0.293164	2.54299	0.750594	1657.32	37.1642	1685.06	27.8638	1719.75	41.142	1719.75	41.142	96.3699
LAKE PINTO-15 <>	362.122	9731.75	0.909247	9.47525	2.51209	4.42906	7.85964	0.304369	7.44737	0.947546	1712.94	112.038	1717.79	65.1952	1723.69	46.1466	1723.69	46.1466	99.3761
LAKE PINTO-96 <>	129.693	137833	2.60673	9.32227	0.796815	4.59124	4.11617	0.31042	4.0383	0.981084	1742.77	61.6694	1747.68	34.3329	1753.53	14.5801	1753.53	14.5801	99.3865
LAKE PINTO-112 <>	30.6949	10379.1	1.20303	9.11362	2.08772	4.52841	2.87895	0.29932	1.98237	0.688575	1687.94	29.4392	1736.2	23.9491	1794.84	38.0107	1794.84	38.0107	94.0435
LAKE PINTO-51 <>	45.5262	65352.5	2.63357	9.0068	1.66541	4.96957	2.10271	0.324629	1.28366	0.61048	1812.3	20.2798	1814.16	17.7758	1816.28	30.2421	1816.28	30.2421	99.7806
LAKE PINTO-20 <>	139.549	42800.9	2.33756	8.90007	0.412584	4.88082	0.884371	0.315054	0.782232	0.884507	1765.53	12.0808	1798.95	7.45293	1837.9	7.47233	1837.9	7.47233	96.0626
LAKE PINTO-2 <>	101.333	215426	1.76692	8.63416	0.743554	5.5359	2.60983	0.346663	2.50167	0.958556	1918.64	41.5147	1906.19	22.4489	1892.64	13.3762	1892.64	13.3762	101.374
LAKE PINTO-88 <>	55.3092	173451	1.0872	8.19292	1.09264	6.00416	1.95275	0.356771	1.61845	0.828804	1966.85	27.4348	1976.45	16.9986	1986.49	19.4408	1986.49	19.4408	99.0113
LAKE PINTO-110 <>	206.95	873536	1.4238	7.74497	0.311855	6.91313	0.69976	0.388323	0.626427	0.895202	2115.05	11.2951	2100.34	6.20742	2085.95	5.48621	2085.95	5.48621	101.395
LAKE PINTO-52 <>	109.795	235879	2.08412	7.30711	0.486152	7.68841	1.10375	0.407456	0.990922	0.897775	2203.28	18.4929	2195.25	9.91772	2187.74	8.45379	2187.74	8.45379	100.71
LAKE PINTO-90 <>	18.5308	62766.3	1.61616	5.40322	1.17739	13.051	3.11514	0.51144	2.88407	0.925823	2662.77	62.9131	2683.35	29.3877	2698.87	19.4421	2698.87	19.4421	98.6626
LAKE PINTO-18 <>	69.7019	228017	1.2761	5.34401	0.368582	13.5769	2.3998	0.526219	2.37133	0.988135	2725.5	52.7071	2720.66	22.6993	2717.05	6.0768	2717.05	6.0768	100.311
LAKE PINTO-7 <>	197.831	702781	1.51306	5.33675	0.25538	13.7101	2.20858	0.53066	2.19376	0.993292	2744.23	49.0291	2729.89	20.904	2719.29	4.20955	2719.29	4.20955	100.917
LAKE PINTO-85 <>	220.718	176671	2.64864	5.27189	0.160929	13.0034	1.74025	0.49719	1.7328	0.995715	2601.71	37.0951	2679.9	16.4098	2739.42	2.64784	2739.42	2.64784	94.9729
LAKE PINTO-63 <>	225.776	83494.4	1.35238	5.13976	0.108283	14.3021	1.75928	0.53314	1.75595	0.998104	2754.67	39.3636	2769.96	16.6976	2781.1	1.77471	2781.1	1.77471	99.0496
LAKE PINTO-122 <>	161.939	810676	2.0544	4.97755	0.16783	15.4755	1.70349	0.558676	1.6952	0.995135	2861.15	39.1696	2844.98	16.2485	2833.52	2.7341	2833.52	2.7341	100.975
LAKE PINTO-19 <>	200.043	673285	2.06489	3.44824	1.01907	24.6675	2.38855	0.61691	2.16025	0.904419	3097.61	53.1335	3295.15	23.3122	3417.61	15.8506	3417.61	15.8506	90.6367
Turkey Creek sandstone, sample 7 (Late Pennsylvanian)
TURKEY CREEK-35 <>	641.994	17693.4	1.81644	17.5624	1.80004	0.588502	10.5788	0.0749602	10.4246	0.985417	465.97	46.8621	469.911	39.8153	489.206	39.7362	465.97	46.8621	95.2502
TURKEY CREEK-6 <>	113.267	22553.8	1.4967	18.2808	4.13372	0.571404	4.76496	0.0757595	2.37008	0.497397	470.762	10.7598	458.922	17.595	400.053	92.6407	470.762	10.7598	117.675
TURKEY CREEK-88 <>	18.0981	3097.21	1.21081	18.5546	25.5795	0.590106	26.2721	0.0794109	5.99285	0.228107	492.605	28.4216	470.935	99.3141	366.643	585.067	492.605	28.4216	134.355
TURKEY CREEK-125 <>	40.7759	12154.6	0.918754	17.5159	9.6697	0.665263	10.9443	0.0845129	5.12596	0.468366	523.004	25.7504	517.828	44.4229	495.075	213.575	523.004	25.7504	105.641
TURKEY CREEK-97 <>	46.2065	15092.2	1.78041	16.7512	7.10008	0.726652	7.6467	0.0882817	2.83917	0.371294	545.367	14.847	554.586	32.687	592.598	154.09	545.367	14.847	92.0299
TURKEY CREEK-84 <>	64.4121	12767.2	1.05341	17.0983	4.78294	0.72413	5.34062	0.0897985	2.37605	0.444902	554.345	12.6211	553.102	22.7793	548.008	104.531	554.345	12.6211	101.156
TURKEY CREEK-109 <>	200.234	44037.8	1.56555	17.0387	3.56862	0.729907	4.10379	0.090199	2.02635	0.493775	556.714	10.8076	556.499	17.5834	555.639	77.887	556.714	10.8076	100.193
TURKEY CREEK-99 <>	40.3992	18098.1	1.31886	16.1249	8.74473	0.782387	10.6031	0.0914993	5.99621	0.565517	564.398	32.4036	586.844	47.2928	674.635	187.34	564.398	32.4036	83.6598
TURKEY CREEK-5 <>	239.679	58639.8	6.40222	16.9209	2.47951	0.75228	3.55881	0.0923211	2.55287	0.71734	569.25	13.9091	569.546	15.5147	570.749	53.9568	569.25	13.9091	99.7373
TURKEY CREEK-103 <>	85.2969	16254.3	0.890429	16.7587	5.16764	0.768529	5.46028	0.0934114	1.76354	0.322977	575.681	9.71228	578.919	24.0976	591.644	112.128	575.681	9.71228	97.302
TURKEY CREEK-62 <>	43.163	12717.8	1.82449	16.7336	8.24436	0.771512	10.2805	0.0936337	6.14154	0.597399	576.991	33.8969	580.63	45.4917	594.882	178.925	576.991	33.8969	96.9926
TURKEY CREEK-85 <>	384.832	198012	4.26482	16.9068	1.15069	0.767572	2.90554	0.0941195	2.66797	0.918236	579.855	14.795	578.369	12.8121	572.542	25.0393	579.855	14.795	101.277
TURKEY CREEK-16 <>	63.9274	16491.3	0.341481	17.7042	5.14647	0.734592	6.06688	0.094324	3.21262	0.529533	581.059	17.8507	559.245	26.094	471.436	113.958	581.059	17.8507	123.253
TURKEY CREEK-116 <>	69.7825	11247.3	0.396263	16.3756	4.06023	0.79878	4.3118	0.0948685	1.45125	0.336577	584.266	8.10626	596.14	19.4442	641.601	87.3527	584.266	8.10626	91.0637
TURKEY CREEK-7 <>	114.263	30393.6	1.08494	16.453	3.64301	0.798389	4.31785	0.0952703	2.31782	0.5368	586.631	12.9967	595.919	19.4662	631.454	78.482	586.631	12.9967	92.9017
TURKEY CREEK-61 <>	62.2425	23737.2	1.57091	17.1606	7.11311	0.775479	9.68037	0.0965167	6.56606	0.678286	593.963	37.2576	582.901	42.9571	540.057	155.759	593.963	37.2576	109.982
TURKEY CREEK-2 <>	192.951	89951.2	16.3542	16.6616	2.05194	0.814657	3.57686	0.098444	2.92976	0.819086	605.284	16.9263	605.063	16.3061	604.216	44.3989	605.284	16.9263	100.177
TURKEY CREEK-74 <>	340.051	84608	0.807222	16.5516	1.37912	0.833439	3.41414	0.100049	3.1232	0.914783	614.694	18.3113	615.518	15.7599	618.532	29.7791	614.694	18.3113	99.3795
TURKEY CREEK-22 <>	107.827	39812.3	3.38056	16.087	4.64706	0.859271	5.02831	0.100255	1.92062	0.381961	615.901	11.2816	629.725	23.6003	679.663	99.3396	615.901	11.2816	90.6186
TURKEY CREEK-87 <>	374.096	47685.5	1.76925	16.4208	1.66436	0.877077	2.11111	0.104455	1.29873	0.615186	640.467	7.91806	639.403	10.0164	635.668	35.8441	640.467	7.91806	100.755
TURKEY CREEK-24 <>	55.1572	4319.11	0.686266	16.1352	7.67752	0.938128	9.27108	0.109783	5.19698	0.560558	671.487	33.1413	671.902	45.5965	673.298	164.432	671.487	33.1413	99.7309
TURKEY CREEK-90 <>	27.9849	23495.5	0.324403	15.4907	9.74593	1.0659	10.3316	0.119754	3.42916	0.331909	729.145	23.6414	736.729	54.1773	759.835	205.98	729.145	23.6414	95.961
TURKEY CREEK-58 <>	24.717	1346.84	1.64006	15.0377	10.2142	1.17227	11.6545	0.127852	5.61226	0.481552	775.598	41.0125	787.706	63.9457	822.163	213.781	775.598	41.0125	94.3363
TURKEY CREEK-106 <>	111.448	35223.4	0.993706	14.6081	2.21235	1.27772	2.82787	0.135372	1.76135	0.622854	818.438	13.538	835.837	16.1087	882.382	45.7708	818.438	13.538	92.7532
TURKEY CREEK-124 <>	56.8195	18218.3	1.4483	14.6893	5.9859	1.38209	9.49395	0.147243	7.36913	0.776192	885.492	60.9716	881.331	55.988	870.893	124.122	885.492	60.9716	101.676
TURKEY CREEK-60 <>	48.6665	25556.7	1.68743	14.3252	4.64024	1.50366	5.29839	0.156224	2.55756	0.482704	935.756	22.2767	931.87	32.3217	922.709	95.4037	922.709	95.4037	101.414
TURKEY CREEK-76 <>	93.2839	17981.8	1.19797	14.2302	3.49995	1.46198	4.42209	0.150886	2.70282	0.611208	905.929	22.843	914.824	26.6694	936.327	71.778	936.327	71.778	96.7535
TURKEY CREEK-69 <>	186.336	76154.9	3.13908	14.1569	0.801053	1.61652	2.04763	0.165978	1.88444	0.920301	989.912	17.2926	976.642	12.8458	946.897	16.4208	946.897	16.4208	104.543
TURKEY CREEK-43 <>	75.059	33160.7	1.59074	14.0916	2.99156	1.55229	3.35542	0.158647	1.51968	0.452903	949.255	13.4138	951.404	20.7243	956.361	61.1743	956.361	61.1743	99.257
TURKEY CREEK-10 <>	137.071	5842.75	1.43882	14.075	2.02824	1.58472	3.24779	0.16177	2.53661	0.781026	966.606	22.7694	964.224	20.2215	958.777	41.4353	958.777	41.4353	100.817
TURKEY CREEK-59 <>	55.2258	12503.7	0.89775	14.0221	4.32273	1.64788	5.36995	0.167586	3.18596	0.593294	998.799	29.4789	988.74	33.9461	966.488	88.283	966.488	88.283	103.343
TURKEY CREEK-65 <>	133.878	74833.8	2.79234	13.9498	1.4981	1.68802	6.01219	0.170783	5.82255	0.968458	1016.42	54.7532	1004.02	38.3543	977.011	30.522	977.011	30.522	104.034
TURKEY CREEK-44 <>	41.8296	13529	2.10353	13.9117	5.34849	1.62635	9.69395	0.164094	8.08494	0.834019	979.49	73.4716	980.449	61.026	982.618	109.001	982.618	109.001	99.6816
TURKEY CREEK-75 <>	64.8278	35615.3	2.49786	13.8875	2.93843	1.70081	3.46252	0.171307	1.83157	0.52897	1019.31	17.2682	1008.83	22.1438	986.132	59.8188	986.132	59.8188	103.365
TURKEY CREEK-9 <>	50.3713	13565.5	0.997267	13.8703	2.53443	1.6895	4.58606	0.169959	3.82212	0.833421	1011.89	35.7932	1004.58	29.2601	988.652	51.5669	988.652	51.5669	102.35
TURKEY CREEK-77 <>	39.6855	23065.3	1.31648	13.8252	4.41613	1.57621	5.17652	0.158046	2.70076	0.521733	945.908	23.761	960.877	32.1696	995.302	89.7934	995.302	89.7934	95.0372
TURKEY CREEK-70 <>	171.81	44838.7	3.06768	13.7275	1.02069	1.70479	3.02361	0.169731	2.84612	0.941299	1010.63	26.6225	1010.33	19.3529	1009.67	20.6964	1009.67	20.6964	100.095
TURKEY CREEK-50 <>	115.971	7637.03	2.86575	13.6889	1.47946	1.73702	2.83514	0.172454	2.41851	0.853049	1025.62	22.9323	1022.36	18.2717	1015.37	29.9808	1015.37	29.9808	101.01
TURKEY CREEK-107 <>	239.092	131895	2.48788	13.6586	0.605595	1.77106	1.55392	0.175444	1.43105	0.920933	1042.04	13.7693	1034.91	10.0846	1019.86	12.262	1019.86	12.262	102.175
TURKEY CREEK-32 <>	183.537	141912	3.14982	13.6011	0.693893	1.71564	3.75798	0.169238	3.69336	0.982805	1007.91	34.4619	1014.4	24.1113	1028.4	14.0306	1028.4	14.0306	98.0075
TURKEY CREEK-92 <>	217.2	42961.3	1.07744	13.574	0.715553	1.76001	2.65601	0.173269	2.55781	0.963026	1030.1	24.3507	1030.85	17.1991	1032.44	14.4795	1032.44	14.4795	99.7734
TURKEY CREEK-3 <>	89.114	29151.5	2.20561	13.5384	2.06693	1.75413	2.65801	0.172237	1.67118	0.628733	1024.43	15.829	1028.69	17.1912	1037.73	41.7268	1037.73	41.7268	98.7177
TURKEY CREEK-86 <>	29.5081	11710.6	0.996582	13.5379	7.51694	1.59181	8.44899	0.156293	3.85761	0.456576	936.146	33.6134	967.007	52.7368	1037.81	151.989	1037.81	151.989	90.2036
TURKEY CREEK-56 <>	206.219	129240	2.66671	13.5123	0.777959	1.81676	2.19635	0.178043	2.05396	0.935168	1056.28	20.0113	1051.52	14.385	1041.63	15.7195	1041.63	15.7195	101.406
TURKEY CREEK-89 <>	156.962	105985	3.65339	13.48	1.18332	1.82288	1.93194	0.178216	1.52714	0.790467	1057.22	14.8908	1053.72	12.6681	1046.49	23.8825	1046.49	23.8825	101.025
TURKEY CREEK-71 <>	639.976	218132	3.77402	13.4646	0.182238	1.85093	3.28334	0.180752	3.27828	0.998458	1071.08	32.3514	1063.76	21.6479	1048.79	3.67451	1048.79	3.67451	102.125
TURKEY CREEK-115 <>	89.2024	40874.7	1.58656	13.4512	2.01337	1.84974	2.75	0.180455	1.87319	0.681161	1069.46	18.4596	1063.34	18.1265	1050.81	40.5784	1050.81	40.5784	101.775
TURKEY CREEK-8 <>	149.694	92637.2	2.50959	13.4167	1.06983	1.8236	2.96098	0.177449	2.76095	0.932446	1053.02	26.8232	1053.98	19.4198	1055.98	21.5528	1055.98	21.5528	99.7195
TURKEY CREEK-13 <>	130.692	23528.7	1.37995	13.3968	1.23467	1.84574	2.87307	0.179338	2.59425	0.902953	1063.36	25.4311	1061.91	18.9235	1058.97	24.8525	1058.97	24.8525	100.415
TURKEY CREEK-53 <>	65.1649	28935.4	1.06863	13.3921	2.3263	1.87939	4.74918	0.182543	4.14041	0.871817	1080.85	41.2017	1073.85	31.485	1059.67	46.8385	1059.67	46.8385	101.999
TURKEY CREEK-93 <>	48.4036	30554.4	0.776946	13.3802	1.63764	1.75714	2.82578	0.170517	2.30287	0.814947	1014.96	21.6261	1029.79	18.2879	1061.47	32.971	1061.47	32.971	95.6184
TURKEY CREEK-100 <>	77.1178	34875.5	2.07268	13.3419	2.40846	1.84896	7.80454	0.178913	7.42362	0.951193	1061.04	72.6296	1063.06	51.4743	1067.24	48.4433	1067.24	48.4433	99.4192
TURKEY CREEK-122 <>	278.707	135494	1.43674	13.3274	0.578644	1.89697	1.18969	0.183361	1.03949	0.873747	1085.31	10.3831	1080.03	7.91026	1069.41	11.6201	1069.41	11.6201	101.487
TURKEY CREEK-111 <>	169.196	34908.4	1.79873	13.3105	0.751246	1.79875	3.22435	0.173645	3.13562	0.972479	1032.16	29.9068	1045	21.0446	1071.97	15.0813	1071.97	15.0813	96.2871
TURKEY CREEK-15 <>	36.7816	16697	0.765889	13.3038	3.98012	1.86595	4.46318	0.180043	2.01956	0.452493	1067.21	19.8634	1069.1	29.514	1072.97	79.955	1072.97	79.955	99.4628
TURKEY CREEK-118 <>	55.1116	17660	1.28775	13.2638	4.71635	1.87805	9.03855	0.180664	7.71048	0.853065	1070.6	76.0616	1073.37	59.9572	1079	94.7116	1079	94.7116	99.2216
TURKEY CREEK-20 <>	51.8674	35080.6	1.2398	13.2236	3.1756	1.84463	3.68238	0.176913	1.86426	0.506265	1050.09	18.0651	1061.52	24.2507	1085.1	63.6936	1085.1	63.6936	96.773
TURKEY CREEK-47 <>	74.6491	8606.29	1.48834	13.2197	2.9048	1.68653	4.31283	0.161702	3.18789	0.739164	966.226	28.6051	1003.45	27.498	1085.69	58.2464	1085.69	58.2464	88.9967
TURKEY CREEK-117 <>	71.017	36521.1	1.10437	13.2169	3.5886	1.89271	4.67757	0.181431	3.00027	0.641416	1074.79	29.7019	1078.53	31.086	1086.09	71.9605	1086.09	71.9605	98.959
TURKEY CREEK-27 <>	38.5258	59042.8	3.12933	13.1643	3.4679	1.94623	3.55355	0.185819	0.775504	0.218234	1098.69	7.83384	1097.15	23.8396	1094.11	69.4566	1094.11	69.4566	100.418
TURKEY CREEK-33 <>	118.19	49556.3	0.928767	13.1615	1.51652	1.94444	3.12495	0.185608	2.7323	0.87435	1097.54	27.5744	1096.53	20.9569	1094.55	30.348	1094.55	30.348	100.274
TURKEY CREEK-72 <>	111.923	66212.2	1.60533	13.0749	1.47471	2.00594	2.05413	0.19022	1.42993	0.696124	1122.57	14.732	1117.52	13.9195	1107.74	29.4877	1107.74	29.4877	101.338
TURKEY CREEK-95 <>	75.9598	80527	3.47269	13.0189	1.63534	2.06618	2.78261	0.195092	2.25135	0.809079	1148.9	23.692	1137.67	19.0416	1116.32	32.6558	1116.32	32.6558	102.919
TURKEY CREEK-54 <>	72.2969	36227.1	2.68062	13.0158	3.30335	1.90861	4.58233	0.180171	3.17578	0.69305	1067.91	31.2545	1084.1	30.5407	1116.8	65.9366	1116.8	65.9366	95.6226
TURKEY CREEK-57 <>	80.641	49200.5	1.25409	13.0045	2.71046	2.0496	2.98806	0.193313	1.25774	0.420923	1139.3	13.1346	1132.16	20.3941	1118.53	54.0829	1118.53	54.0829	101.856
TURKEY CREEK-29 <>	228.368	116347	2.37177	12.9813	0.49148	2.04484	1.55271	0.19252	1.47287	0.948582	1135.01	15.3283	1130.58	10.5884	1122.07	9.81492	1122.07	9.81492	101.154
TURKEY CREEK-120 <>	99.9921	46942.3	2.04503	12.9682	1.24796	2.00041	4.5287	0.188146	4.35336	0.961282	1111.33	44.4401	1115.65	30.6671	1124.06	24.8852	1124.06	24.8852	98.8667
TURKEY CREEK-102 <>	32.6083	22147.6	1.33482	12.9105	5.84145	1.82077	7.04878	0.170489	3.94497	0.559667	1014.8	37.042	1052.96	46.2308	1132.96	116.391	1132.96	116.391	89.5712
TURKEY CREEK-42 <>	296.522	104631	2.75866	12.8768	0.498519	2.00486	2.21327	0.187237	2.15639	0.974303	1106.39	21.9231	1117.15	14.9953	1138.18	9.90988	1138.18	9.90988	97.207
TURKEY CREEK-18 <>	65.7173	20842	2.10198	12.6906	4.56149	1.90173	5.23951	0.175037	2.57784	0.492	1039.81	24.7546	1081.69	34.8805	1167.06	90.4051	1167.06	90.4051	89.0964
TURKEY CREEK-51 <>	162.268	165299	3.25378	12.6193	0.662104	2.24763	2.63299	0.205713	2.54838	0.967866	1205.94	28.0286	1196.05	18.5048	1178.24	13.1134	1178.24	13.1134	102.35
TURKEY CREEK-48 <>	60.8341	26957.1	1.44535	12.5645	1.67386	2.05716	5.18047	0.187462	4.9026	0.946361	1107.61	49.8939	1134.68	35.41	1186.84	33.0705	1186.84	33.0705	93.3243
TURKEY CREEK-23 <>	56.7949	21956.8	2.03264	12.5586	2.5766	2.20898	3.30274	0.201201	2.06621	0.625604	1181.77	22.3104	1183.89	23.0889	1187.78	50.8807	1187.78	50.8807	99.4936
TURKEY CREEK-114 <>	41.3755	18405.3	2.12763	12.5115	3.27986	2.28395	4.44242	0.20725	2.99626	0.674467	1214.15	33.1589	1207.34	31.3818	1195.16	64.7019	1195.16	64.7019	101.589
TURKEY CREEK-30 <>	56.0736	53230.8	1.82084	12.3366	1.99769	2.20138	2.29737	0.196966	1.13453	0.493837	1159	12.0349	1181.48	16.0419	1222.86	39.254	1222.86	39.254	94.7777
TURKEY CREEK-38 <>	1060.91	4826.27	2.33822	12.2752	0.473387	1.08807	6.777	0.0968696	6.76045	0.997557	596.037	38.4885	747.568	35.8724	1232.7	9.30766	1232.7	9.30766	48.3522
TURKEY CREEK-81 <>	23.7818	11837.4	1.29616	12.0355	4.30438	2.60874	5.83845	0.227716	3.9446	0.675623	1322.52	47.1655	1303.1	42.8806	1271.29	84.0115	1271.29	84.0115	104.03
TURKEY CREEK-28 <>	49.4206	53499.6	1.0982	12.0128	1.65337	2.54945	2.10492	0.222122	1.30272	0.618889	1293.08	15.2632	1286.28	15.3527	1274.93	32.2338	1274.93	32.2338	101.423
TURKEY CREEK-110 <>	114.119	128864	4.46211	11.9803	1.24603	2.55899	2.25451	0.222349	1.87889	0.833392	1294.27	22.0323	1289	16.4612	1280.22	24.2668	1280.22	24.2668	101.098
TURKEY CREEK-25 <>	99.395	88650.9	1.70883	11.558	1.385	2.82483	2.12321	0.236796	1.60928	0.757948	1370.02	19.8622	1362.15	15.9235	1349.82	26.73	1349.82	26.73	101.497
TURKEY CREEK-82 <>	28.2638	24176.5	2.53932	10.6752	4.79519	2.98197	5.31172	0.230875	2.28484	0.430151	1339.08	27.6274	1403.03	40.411	1501.56	90.6961	1501.56	90.6961	89.1792
TURKEY CREEK-46 <>	182.767	271846	1.16179	10.5315	1.01269	3.10134	9.55227	0.236886	9.49844	0.994365	1370.49	117.281	1433.02	73.4712	1527.12	19.0777	1527.12	19.0777	89.7432
TURKEY CREEK-78 <>	203.584	52012.3	2.01379	10.4799	0.654318	3.40835	1.57456	0.25906	1.43217	0.909568	1485.03	18.9963	1506.32	12.3617	1536.37	12.3123	1536.37	12.3123	96.6582
TURKEY CREEK-104 <>	30.9604	21125.5	0.784729	10.2137	3.14964	3.7093	3.9917	0.274774	2.45223	0.614332	1564.99	34.0742	1573.38	31.935	1584.63	58.9034	1584.63	58.9034	98.7608
TURKEY CREEK-39 <>	84.2007	65161.9	3.7716	9.97182	0.838011	4.01973	1.81993	0.290716	1.61551	0.887679	1645.11	23.4568	1638.19	14.799	1629.31	15.5773	1629.31	15.5773	100.969
TURKEY CREEK-79 <>	106.194	69956.7	0.999341	9.82947	0.974348	4.05771	2.79019	0.289275	2.61453	0.937046	1637.9	37.8166	1645.85	22.7333	1656	18.0499	1656	18.0499	98.9075
TURKEY CREEK-26 <>	67.3273	17026.9	0.919737	9.79902	1.7971	3.94112	3.59451	0.280092	3.11302	0.866049	1591.83	43.9104	1622.17	29.1194	1661.74	33.2705	1661.74	33.2705	95.7928
TURKEY CREEK-91	18.8237	12561.6	0.860292	9.77035	4.49854	4.02487	6.33407	0.285208	4.4591	0.703986	1617.54	63.7922	1639.23	51.56	1667.16	83.2592	1667.16	83.2592	97.0234
TURKEY CREEK-37 <>	96.6093	65521.8	0.983973	9.55435	0.593892	4.27435	2.2304	0.29619	2.14988	0.963898	1672.39	31.6692	1688.44	18.3553	1708.41	10.9281	1708.41	10.9281	97.8916
TURKEY CREEK-21 <>	50.468	41903.5	3.54849	9.45366	1.67362	4.60116	3.76665	0.315476	3.37441	0.895865	1767.6	52.1686	1749.48	31.4278	1727.88	30.7241	1727.88	30.7241	102.299
TURKEY CREEK-66 <>	112.271	126851	1.72759	9.39907	0.976486	4.50597	1.82412	0.307165	1.54074	0.84465	1726.74	23.3395	1732.07	15.159	1738.51	17.9017	1738.51	17.9017	99.3233
TURKEY CREEK-4 <>	297.625	153199	1.37054	9.38987	0.277907	4.56931	1.97933	0.311178	1.95972	0.990094	1746.5	29.9822	1743.69	16.4906	1740.3	5.09228	1740.3	5.09228	100.356
TURKEY CREEK-68 <>	421.729	280992	2.66249	9.14591	0.207374	4.82115	1.67704	0.319798	1.66417	0.992325	1788.74	25.9948	1788.59	14.104	1788.4	3.77859	1788.4	3.77859	100.019
TURKEY CREEK-19 <>	241.737	239105	1.73995	9.09793	0.409387	4.95798	2.23065	0.327149	2.19276	0.983014	1824.55	34.8449	1812.19	18.8502	1797.98	7.45069	1797.98	7.45069	101.478
TURKEY CREEK-108 <>	27.3273	24934.9	0.634584	8.87841	3.26556	4.98221	3.9294	0.320816	2.18548	0.556186	1793.71	34.2202	1816.31	33.2408	1842.31	59.1215	1842.31	59.1215	97.3623
TURKEY CREEK-36 <>	345.566	502710	1.53381	8.85723	0.232338	5.21259	1.89456	0.33485	1.88026	0.992452	1861.84	30.4059	1854.68	16.142	1846.63	4.20339	1846.63	4.20339	100.824
TURKEY CREEK-119 <>	97.9497	152239	0.803917	8.61812	0.518449	5.37241	2.94391	0.3358	2.8979	0.984371	1866.43	46.9622	1880.47	25.2063	1895.99	9.32231	1895.99	9.32231	98.441
TURKEY CREEK-123 <>	30.3458	34347.3	0.531315	8.61388	1.78904	5.43791	2.76388	0.339726	2.10674	0.762242	1885.35	34.4387	1890.85	23.7091	1896.87	32.1706	1896.87	32.1706	99.3926
TURKEY CREEK-112 <>	287.998	272948	5.55525	7.97056	0.66531	6.21568	1.65001	0.359316	1.50993	0.915105	1978.93	25.7296	2006.66	14.433	2035.31	11.7698	2035.31	11.7698	97.2299
TURKEY CREEK-105 <>	222.634	143548	1.9503	7.83228	5.31862	5.29789	10.2325	0.300947	8.74161	0.854301	1696	130.377	1868.52	87.6182	2066.22	93.8341	2066.22	93.8341	82.0826
TURKEY CREEK-17 <>	23.3835	33321.2	0.461377	7.58513	1.87131	6.99284	4.2289	0.384694	3.79233	0.896766	2098.17	67.9206	2110.52	37.5844	2122.56	32.7835	2122.56	32.7835	98.851
TURKEY CREEK-12 <>	33.3776	5176.26	0.423361	6.11031	1.50825	10.5389	5.23398	0.467041	5.01196	0.957581	2470.57	102.867	2483.34	48.5762	2493.79	25.4063	2493.79	25.4063	99.0689
TURKEY CREEK-40 <>	317.16	331624	2.15138	5.44115	0.134301	13.4515	1.81724	0.530837	1.81227	0.997265	2744.98	40.5116	2711.89	17.1768	2687.31	2.21706	2687.31	2.21706	102.146
TURKEY CREEK-80 <>	8.89748	5439.21	0.741199	5.32492	4.08918	10.8193	6.11408	0.417842	4.54539	0.74343	2250.67	86.3574	2507.73	56.8882	2722.95	67.4027	2722.95	67.4027	82.6558
TURKEY CREEK-73 <>	43.6424	81886.7	0.545705	5.29179	0.436474	13.7814	1.97677	0.528924	1.92798	0.975319	2736.92	42.9968	2734.8	18.716	2733.23	7.18195	2733.23	7.18195	100.135
TURKEY CREEK-34 <>	98.1114	157238	0.992307	2.99564	0.247316	28.2791	2.35268	0.614403	2.33965	0.994459	3087.61	57.4013	3428.82	23.0768	3634.7	3.78693	3634.7	3.78693	84.948
Colony Creek sandstone, sample 8 (Late Pennsylvanian)
COLONY CREEK-107 <>	355.204	31629.2	1.3528	18.396	2.11528	0.378839	3.7993	0.0505447	3.15599	0.830677	317.865	9.78848	326.183	10.5996	385.962	47.5166	317.865	9.78848	82.3
COLONY CREEK-27 <>	81.9417	2022.41	1.74435	17.6894	7.07108	0.415277	7.66862	0.0532782	2.96775	0.386999	334.617	9.67726	352.668	22.8516	473.268	156.603	334.617	9.67726	70.7
COLONY CREEK-85 <>	203.537	32337	1.78923	18.8404	2.94962	0.442633	4.34246	0.0604829	3.18696	0.733906	378.562	11.7172	372.107	13.5294	332.099	66.8775	378.562	11.7172	113.9
COLONY CREEK-103 <>	72.2638	4693.33	1.08147	16.1018	12.3354	0.569189	12.7346	0.0664707	3.16347	0.248416	414.858	12.7106	457.49	46.9358	677.707	264.58	414.858	12.7106	61.215
COLONY CREEK-99 <>	123.003	21450.5	0.586068	18.7956	4.97976	0.509424	8.50175	0.0694439	6.89071	0.810504	432.804	28.8444	418.062	29.1424	337.493	112.858	432.804	28.8444	128.241
COLONY CREEK-75 <>	459.317	11363.4	1.12337	17.5469	3.70628	0.564672	4.32365	0.0718613	2.22653	0.514966	447.36	9.62286	454.563	15.8449	491.13	81.7841	447.36	9.62286	91.0878
COLONY CREEK-21 <>	64.3069	14001.3	0.465138	18.1287	8.51626	0.554678	9.32457	0.0729301	3.79748	0.407256	453.784	16.6399	448.057	33.7924	418.738	190.475	453.784	16.6399	108.37
COLONY CREEK-39 <>	485.63	76201	0.4656	17.767	1.02474	0.592219	2.48654	0.0763125	2.26557	0.911132	474.074	10.3551	472.284	9.39111	463.613	22.7087	474.074	10.3551	102.257
COLONY CREEK-70 <>	40.5949	5154.68	0.323237	18.6954	11.4241	0.590893	12.0186	0.0801201	3.73338	0.310633	496.839	17.8522	471.438	45.3567	349.622	258.989	496.839	17.8522	142.107
COLONY CREEK-19 <>	64.0371	26205.8	0.367208	17.3108	5.41402	0.642164	5.98844	0.0806237	2.55925	0.427365	499.845	12.3089	503.645	23.7822	520.926	118.895	499.845	12.3089	95.953
COLONY CREEK-30 <>	69.2903	20398.5	1.22275	17.7925	4.33242	0.629718	4.60201	0.0812608	1.55198	0.337239	503.644	7.5189	495.92	18.0575	460.398	96.1135	503.644	7.5189	109.393
COLONY CREEK-24 <>	98.3609	74552.5	1.88229	17.1443	2.4242	0.655829	3.81765	0.0815475	2.94919	0.772514	505.353	14.3346	512.06	15.3545	542.136	53.0295	505.353	14.3346	93.2152
COLONY CREEK-64 <>	229.21	57217.5	1.64254	17.3648	1.28526	0.672507	3.21195	0.0846964	2.9436	0.916451	524.094	14.8168	522.236	13.1145	514.104	28.2417	524.094	14.8168	101.943
COLONY CREEK-116 <>	99.6553	7099.52	2.26049	17.2073	3.14386	0.678681	3.33426	0.0846988	1.11063	0.333095	524.108	5.59054	525.977	13.6884	534.083	68.8433	524.108	5.59054	98.1323
COLONY CREEK-44 <>	121.163	18221.7	1.02703	17.1918	3.34553	0.683972	3.93602	0.0852822	2.07356	0.526817	527.575	10.5039	529.172	16.2341	536.047	73.2168	527.575	10.5039	98.4196
COLONY CREEK-16 <>	222.243	41876.7	3.23602	17.1995	1.62175	0.694802	5.11229	0.0866711	4.84824	0.94835	535.82	24.9276	535.682	21.2839	535.086	35.4921	535.82	24.9276	100.137
COLONY CREEK-31 <>	43.5159	8596.78	1.17315	18.4887	15.088	0.654878	15.3156	0.0878145	2.63068	0.171764	542.599	13.6899	511.476	61.6159	374.652	341.309	542.599	13.6899	144.827
COLONY CREEK-56 <>	47.7549	16168.3	3.50799	17.6742	6.1537	0.690758	6.43566	0.0885452	1.88407	0.292754	546.927	9.87946	533.256	26.7035	475.205	136.206	546.927	9.87946	115.093
COLONY CREEK-26 <>	132.194	24673.9	1.82583	17.4325	2.75228	0.717403	3.29664	0.0907032	1.81459	0.550437	559.694	9.72776	549.133	13.9836	505.555	60.5813	559.694	9.72776	110.709
COLONY CREEK-67 <>	55.989	13434.4	1.79568	18.4454	4.88286	0.683743	5.20249	0.0914704	1.79541	0.345106	564.227	9.69954	529.034	21.4547	379.927	109.85	564.227	9.69954	148.509
COLONY CREEK-120 <>	65.8601	22386.8	2.31223	16.6532	5.0362	0.757653	5.58694	0.0915098	2.41879	0.432937	564.46	13.0725	572.655	24.4582	605.297	109.008	564.46	13.0725	93.2535
COLONY CREEK-12 <>	109.615	17198.3	1.47618	17.26	4.67409	0.750824	6.69338	0.0939892	4.79106	0.715791	579.087	26.5349	568.703	29.1535	527.416	102.518	579.087	26.5349	109.797
COLONY CREEK-1 <>	189.16	47253.5	0.661242	17.0605	2.48432	0.764483	2.9094	0.0945929	1.5142	0.520451	582.643	8.43545	576.593	12.7999	552.845	54.2241	582.643	8.43545	105.39
COLONY CREEK-92 <>	57.1189	23707.6	0.876474	14.9666	7.66261	0.888582	7.78089	0.0964537	1.35154	0.173699	593.593	7.66433	645.607	37.1891	832.047	159.946	593.593	7.66433	71.3413
COLONY CREEK-79 <>	35.6874	15797.2	1.68579	16.8823	7.56418	0.798141	8.53763	0.0977258	3.95907	0.46372	601.068	22.7211	595.779	38.4974	575.696	164.654	601.068	22.7211	104.407
COLONY CREEK-48 <>	94.7003	22936.2	0.757022	16.2149	3.38659	0.833991	4.13809	0.0980789	2.37799	0.574657	603.141	13.6921	615.824	19.1093	662.717	72.6005	603.141	13.6921	91.0103
COLONY CREEK-98 <>	127.413	40029.8	0.762928	16.5226	2.09012	0.863882	2.26794	0.103522	0.88032	0.388158	635.015	5.32366	632.24	10.6737	622.305	45.0807	635.015	5.32366	102.043
COLONY CREEK-102 <>	253.363	57597.6	1.9475	16.6209	1.37356	0.861297	1.88459	0.103826	1.29035	0.684688	636.792	7.82407	630.831	8.85512	609.501	29.7132	636.792	7.82407	104.478
COLONY CREEK-87 <>	138.169	16021.6	0.73881	16.2643	1.89854	0.90752	2.12365	0.107051	0.951536	0.448066	655.597	5.93151	655.739	10.2592	656.228	40.7449	655.597	5.93151	99.9038
COLONY CREEK-121 <>	312.818	148414	1.44247	15.7728	1.54795	0.987443	1.874	0.112959	1.05628	0.563649	689.907	6.91094	697.415	9.45431	721.667	32.8462	689.907	6.91094	95.5991
COLONY CREEK-93 <>	443.169	81770	2.90307	16.1633	0.724474	0.975067	1.57204	0.114304	1.39515	0.887478	697.697	9.22568	691.072	7.88052	669.557	15.5186	697.697	9.22568	104.203
COLONY CREEK-110 <>	55.9953	15450	0.882737	15.7761	5.43419	1.07896	5.76555	0.123453	1.92644	0.334129	750.41	13.6465	743.124	30.392	721.217	115.398	750.41	13.6465	104.048
COLONY CREEK-62 <>	102.201	16281.8	2.38607	14.7494	2.78503	1.2081	4.33316	0.129233	3.31962	0.766097	783.49	24.4906	804.316	24.0768	862.406	57.8084	783.49	24.4906	90.8494
COLONY CREEK-9 <>	91.9244	27443.4	1.17021	14.9651	2.02943	1.22024	2.81249	0.132441	1.94718	0.692333	801.776	14.6802	809.884	15.6964	832.255	42.3208	801.776	14.6802	96.3377
COLONY CREEK-106 <>	67.2385	25774.5	1.31769	14.3638	2.4933	1.34362	4.20924	0.139973	3.39134	0.805689	844.51	26.8437	864.798	24.508	917.168	51.2734	844.51	26.8437	92.078
COLONY CREEK-34 <>	175.938	145986	1.67925	14.5116	1.05012	1.49056	1.76531	0.156878	1.41901	0.803827	939.404	12.4044	926.544	10.728	896.082	21.6714	896.082	21.6714	104.835
COLONY CREEK-124 <>	50.1009	33413.2	2.0915	14.4905	4.02152	1.43576	4.44489	0.150891	1.89324	0.425937	905.956	16.0013	903.953	26.6095	899.042	82.9842	899.042	82.9842	100.769
COLONY CREEK-65 <>	177.121	185838	2.22346	14.3249	1.82767	1.47342	3.19885	0.153079	2.62532	0.820706	918.2	22.4677	919.531	19.3511	922.745	37.5696	922.745	37.5696	99.5075
COLONY CREEK-6 <>	92.2962	23339.9	1.10461	14.3141	2.49404	1.50837	3.1782	0.156592	1.96996	0.619835	937.812	17.1936	933.779	19.408	924.291	51.2505	924.291	51.2505	101.463
COLONY CREEK-2 <>	76.4396	27414.4	2.19744	14.2771	2.25228	1.44931	4.99573	0.150072	4.45921	0.892604	901.366	37.5107	909.587	30.0243	929.61	46.243	929.61	46.243	96.9617
COLONY CREEK-4 <>	44.6754	19293.2	2.02104	14.2008	5.4478	1.48731	6.61838	0.153184	3.75824	0.56785	918.787	32.1826	925.218	40.2049	940.598	111.747	940.598	111.747	97.6811
COLONY CREEK-17 <>	49.6613	30701.5	1.35298	14.1034	4.92026	1.54749	5.495	0.158288	2.44664	0.445248	947.258	21.5537	949.492	33.9058	954.656	100.683	954.656	100.683	99.2251
COLONY CREEK-81 <>	30.7952	14274	2.20516	14.0055	5.33239	1.68043	6.26324	0.170695	3.28539	0.524551	1015.94	30.8806	1001.15	39.8904	968.875	108.883	968.875	108.883	104.858
COLONY CREEK-125 <>	151.388	81006.9	0.903624	14.0042	1.45882	1.5999	2.00665	0.162499	1.37786	0.686647	970.65	12.416	970.172	12.5389	969.109	29.7682	969.109	29.7682	100.159
COLONY CREEK-123 <>	22.3658	10716.2	0.400445	13.9408	6.54788	1.64371	6.6969	0.166193	1.40489	0.209783	991.099	12.9064	987.137	42.3025	978.336	133.547	978.336	133.547	101.305
COLONY CREEK-63 <>	120.828	78963.7	2.20295	13.9032	2.00381	1.65698	2.70441	0.167083	1.81619	0.671568	996.017	16.7614	992.222	17.1267	983.823	40.7988	983.823	40.7988	101.239
COLONY CREEK-80 <>	74.6729	23094.4	1.88654	13.8784	2.34305	1.65409	2.97673	0.166493	1.83604	0.616798	992.759	16.8934	991.116	18.8392	987.464	47.6614	987.464	47.6614	100.536
COLONY CREEK-54 <>	90.6273	55188.5	1.81155	13.8278	0.502796	1.67372	2.13179	0.167855	2.07165	0.971788	1000.28	19.1947	998.6	13.5509	994.911	10.2062	994.911	10.2062	100.54
COLONY CREEK-108 <>	96.2706	94108.6	0.690842	13.7365	1.90079	1.65059	2.66781	0.164443	1.87195	0.701682	981.419	17.0416	989.777	16.8703	1008.33	38.5649	1008.33	38.5649	97.3311
COLONY CREEK-74 <>	185.983	93366.8	0.748848	13.6862	1.03587	1.69346	1.57371	0.168095	1.18471	0.752813	1001.61	10.9903	1006.07	10.047	1015.78	20.971	1015.78	20.971	98.6052
COLONY CREEK-3 <>	99.214	75153.5	2.12141	13.6546	1.5901	1.73228	4.997	0.171551	4.73725	0.94802	1020.65	44.7182	1020.6	32.1793	1020.46	32.2024	1020.46	32.2024	100.019
COLONY CREEK-73 <>	66.2931	37789.5	1.43376	13.6476	2.70388	1.79101	7.46895	0.177277	6.96235	0.932172	1052.08	67.5871	1042.19	48.7034	1021.49	54.7504	1021.49	54.7504	102.994
COLONY CREEK-69 <>	64.3459	25529.7	2.43373	13.6254	1.15457	1.72704	3.9573	0.170667	3.78513	0.956493	1015.78	35.5729	1018.65	25.4525	1024.79	23.3785	1024.79	23.3785	99.1209
COLONY CREEK-53 <>	135.409	72404	2.41495	13.6172	1.61455	1.7723	2.06464	0.175034	1.28685	0.623279	1039.79	12.3571	1035.36	13.4028	1026.01	32.6727	1026.01	32.6727	101.343
COLONY CREEK-104 <>	38.0471	41320.4	1.73361	13.5751	3.42365	1.80909	4.21498	0.178116	2.45859	0.583298	1056.67	23.9619	1048.75	27.5694	1032.27	69.2076	1032.27	69.2076	102.364
COLONY CREEK-57 <>	26.6185	4474.95	1.74222	13.5084	8.96028	1.56649	10.0425	0.153473	4.53477	0.45156	920.401	38.8958	957.038	62.3164	1042.2	181.135	1042.2	181.135	88.3129
COLONY CREEK-61 <>	56.3832	33317.7	2.11471	13.5057	3.1673	1.62573	5.57436	0.159245	4.58713	0.822897	952.581	40.6215	980.21	35.0587	1042.61	63.9297	1042.61	63.9297	91.3651
COLONY CREEK-91 <>	119.086	60364.2	2.1285	13.4508	1.8765	1.77938	3.25407	0.173587	2.65852	0.816982	1031.85	25.3491	1037.95	21.1563	1050.86	37.8334	1050.86	37.8334	98.1905
COLONY CREEK-84 <>	280.563	170179	3.07424	13.4368	0.686995	1.85403	2.78029	0.180681	2.69408	0.968991	1070.69	26.5772	1064.86	18.3411	1052.96	13.8591	1052.96	13.8591	101.684
COLONY CREEK-88 <>	209.616	107921	1.39021	13.4353	1.02291	1.80785	2.92762	0.17616	2.7431	0.936973	1045.96	26.4852	1048.3	19.1419	1053.2	20.6264	1053.2	20.6264	99.3131
COLONY CREEK-58 <>	232.877	13905.8	2.98728	13.4327	1.14568	1.71982	2.06749	0.167549	1.72103	0.832425	998.594	15.9212	1015.96	13.2752	1053.59	23.0991	1053.59	23.0991	94.7804
COLONY CREEK-14 <>	55.7195	13226.3	1.8636	13.4175	3.54701	1.88054	6.32647	0.183001	5.2386	0.828044	1083.35	52.241	1074.25	41.9611	1055.86	71.4606	1055.86	71.4606	102.604
COLONY CREEK-15 <>	18.2488	7997.32	0.729043	13.3145	3.55658	1.89079	4.41208	0.182586	2.61098	0.59178	1081.08	25.9871	1077.86	29.3103	1071.36	71.4834	1071.36	71.4834	100.908
COLONY CREEK-68 <>	274.422	119825	2.2395	13.2811	0.515907	1.93132	1.2815	0.186032	1.17306	0.915384	1099.84	11.8613	1092	8.57332	1076.4	10.3445	1076.4	10.3445	102.178
COLONY CREEK-105 <>	232.793	33542.8	3.70702	13.2292	0.586728	1.80374	2.25432	0.173063	2.17663	0.965536	1028.97	20.7008	1046.81	14.7269	1084.26	11.7571	1084.26	11.7571	94.9001
COLONY CREEK-60 <>	396.355	33264.1	2.3406	13.1632	0.365627	1.8839	2.56347	0.179853	2.53726	0.989776	1066.17	24.933	1075.44	17.005	1094.29	7.3212	1094.29	7.3212	97.4306
COLONY CREEK-49 <>	57.7229	16119.6	1.69375	13.0522	2.0669	1.97657	3.36003	0.187109	2.6491	0.788416	1105.69	26.9168	1107.55	22.659	1111.19	41.2657	1111.19	41.2657	99.5058
COLONY CREEK-43 <>	318.935	16469.6	1.86958	13.0177	0.524545	1.86846	2.08408	0.176408	2.01699	0.967808	1047.32	19.4977	1069.99	13.785	1116.5	10.4604	1116.5	10.4604	93.8039
COLONY CREEK-83 <>	39.3917	17662.6	2.65049	12.995	2.44478	2.11692	5.45645	0.199517	4.87811	0.894007	1172.72	52.306	1154.33	37.6459	1119.99	48.7513	1119.99	48.7513	104.709
COLONY CREEK-34 <>	128.5	42506.3	2.49762	12.6802	1.12449	2.23381	2.61894	0.205433	2.36525	0.90313	1204.44	25.9851	1191.71	18.3711	1168.68	22.2599	1168.68	22.2599	103.06
COLONY CREEK-51 <>	23.7723	13036.1	1.02264	12.6508	4.51138	2.21865	5.92944	0.203566	3.84781	0.648933	1194.45	41.954	1186.94	41.5241	1173.31	89.3333	1173.31	89.3333	101.802
COLONY CREEK-114 <>	365.433	280918	2.13999	12.6244	0.520849	2.1779	2.68485	0.19941	2.63385	0.981002	1172.15	28.2287	1174.01	18.6852	1177.45	10.3209	1177.45	10.3209	99.5495
COLONY CREEK-41 <>	181.899	194988	1.42125	12.6237	0.970783	2.12204	3.08908	0.194285	2.93258	0.949336	1144.55	30.7541	1156	21.3225	1177.55	19.1995	1177.55	19.1995	97.1973
COLONY CREEK-95 <>	24.6123	13657	2.68196	12.5538	5.73537	2.24549	8.75576	0.204449	6.61581	0.755595	1199.17	72.3962	1195.38	61.5867	1188.53	113.332	1188.53	113.332	100.895
COLONY CREEK-119 <>	55.6035	28472.7	2.09171	12.5428	2.56085	2.29444	3.69468	0.208723	2.66322	0.720824	1222.01	29.6463	1210.58	26.1336	1190.26	50.5443	1190.26	50.5443	102.668
COLONY CREEK-86 <>	119.171	63287.6	3.14595	12.4787	0.692426	2.26453	2.26353	0.204949	2.15502	0.952062	1201.85	23.6292	1201.32	15.9444	1200.37	13.6317	1200.37	13.6317	100.124
COLONY CREEK-72 <>	572.823	455444	2.50902	12.4566	0.510821	2.20176	2.57258	0.198916	2.52135	0.980088	1169.49	26.9671	1181.6	17.9649	1203.82	10.0794	1203.82	10.0794	97.1486
COLONY CREEK-59 <>	55.6228	35724.8	1.56799	12.3211	2.60012	2.38722	3.5346	0.213324	2.39432	0.677396	1246.5	27.1373	1238.78	25.2993	1225.35	51.0606	1225.35	51.0606	101.726
COLONY CREEK-96	81.1162	14879.5	1.90296	12.1181	1.37549	2.52169	1.86494	0.221628	1.25938	0.675292	1290.47	14.7286	1278.31	13.5601	1257.93	26.8744	1257.93	26.8744	102.587
COLONY CREEK-36 <>	59.2982	23420.6	2.07838	12.0737	1.50063	2.50328	5.12071	0.219205	4.89589	0.956097	1277.67	56.746	1272.99	37.1697	1265.08	29.291	1265.08	29.291	100.995
COLONY CREEK-101 <>	57.1826	34924.1	1.7601	12.0287	1.94959	2.62272	3.50233	0.228807	2.90953	0.830743	1328.24	34.9246	1307.03	25.7512	1272.36	38.0218	1272.36	38.0218	104.392
COLONY CREEK-40 <>	85.8449	71873.2	1.69588	11.4651	0.959732	2.84042	3.78924	0.236189	3.66568	0.967393	1366.86	45.1498	1366.28	28.4642	1365.36	18.4815	1365.36	18.4815	100.109
COLONY CREEK-117 <>	47.5616	32750.4	2.46484	11.4437	3.82922	2.44099	4.64962	0.202597	2.63744	0.567237	1189.25	28.6428	1254.77	33.5033	1368.96	73.7277	1368.96	73.7277	86.8725
COLONY CREEK-112 <>	42.0757	37685.5	1.73805	11.4013	2.75204	2.75973	3.76464	0.228203	2.56882	0.682354	1325.07	30.7684	1344.72	28.0656	1376.1	52.9263	1376.1	52.9263	96.2916
COLONY CREEK-78 <>	83.687	43245	1.62311	11.2583	1.06686	3.04867	3.16874	0.248932	2.98374	0.941618	1432.97	38.3377	1419.9	24.2324	1400.34	20.4454	1400.34	20.4454	102.33
COLONY CREEK-28 <>	105.444	111580	1.45413	10.8156	1.34881	3.30633	2.88462	0.259355	2.54986	0.883947	1486.54	33.852	1482.55	22.4921	1476.82	25.5833	1476.82	25.5833	100.658
COLONY CREEK-29 <>	123.906	101125	1.25706	10.7311	0.538151	3.21411	2.51627	0.250152	2.45805	0.976862	1439.26	31.707	1460.57	19.4893	1491.67	10.1866	1491.67	10.1866	96.4867
COLONY CREEK-76 <>	265.334	219471	1.40975	10.6664	0.354517	3.39965	2.7581	0.262996	2.73522	0.991705	1505.15	36.7166	1504.31	21.6432	1503.12	6.70034	1503.12	6.70034	100.135
COLONY CREEK-111 <>	51.1409	37606.1	1.8472	10.3481	1.63738	3.49125	3.08978	0.262023	2.62025	0.848038	1500.18	35.0701	1525.24	24.3924	1560.16	30.7143	1560.16	30.7143	96.1555
COLONY CREEK-11 <>	36.8135	45323.3	0.86591	9.72165	2.3447	4.33498	2.95042	0.305651	1.79091	0.607001	1719.27	27.0267	1700.04	24.3473	1676.4	43.3287	1676.4	43.3287	102.557
COLONY CREEK-66 <>	242.763	206816	1.14003	9.37216	0.479101	4.57856	2.04006	0.31122	1.98301	0.972033	1746.71	30.3415	1745.37	17.0028	1743.76	8.77646	1743.76	8.77646	100.169
COLONY CREEK-118 <>	30.5022	24175.8	2.47831	8.21848	1.89004	5.95185	2.9495	0.354766	2.26436	0.767708	1957.32	38.2249	1968.84	25.6462	1980.95	33.6518	1980.95	33.6518	98.8073
COLONY CREEK-97 <>	131.574	215634	1.32306	7.83133	0.223104	6.38616	3.87921	0.362722	3.87279	0.998345	1995.06	66.4544	2030.37	34.0688	2066.43	3.93352	2066.43	3.93352	96.5465
COLONY CREEK-25 <>	171.202	323156	1.49865	7.80555	0.212658	6.75797	1.04956	0.382576	1.0278	0.979258	2088.31	18.3339	2080.24	9.28366	2072.24	3.74471	2072.24	3.74471	100.775
COLONY CREEK-77 <>	47.1105	23861.5	1.31637	7.39664	0.619282	7.48242	3.86601	0.401398	3.81609	0.987087	2175.47	70.4641	2170.88	34.6405	2166.53	10.797	2166.53	10.797	100.413
COLONY CREEK-47 <>	164.167	76153.7	1.2776	7.05396	0.965539	7.50694	4.86575	0.384056	4.76899	0.980114	2095.2	85.3121	2173.82	43.6251	2248.86	16.6813	2248.86	16.6813	93.1675
COLONY CREEK-38 <>	98.938	151279	1.10641	6.07702	0.543456	10.07	3.14598	0.443832	3.09869	0.984966	2367.77	61.406	2441.22	29.0661	2502.99	9.14356	2502.99	9.14356	94.5977
COLONY CREEK-90 <>	99.843	168458	4.26364	5.69543	0.451986	11.4549	1.24513	0.473167	1.16019	0.931788	2497.44	24.0222	2560.91	11.6282	2611.54	7.5268	2611.54	7.5268	95.6309
COLONY CREEK-52 <>	31.5793	39918.7	1.10801	5.43789	0.575803	12.9668	4.44368	0.511401	4.40621	0.991569	2662.61	96.1164	2677.24	41.9136	2688.3	9.51563	2688.3	9.51563	99.0443
COLONY CREEK-8 <>	195.537	23606.6	1.7728	4.92267	0.414071	14.23	2.19104	0.508048	2.15156	0.98198	2648.29	46.727	2765.16	20.7896	2851.59	6.74378	2851.59	6.74378	92.8706
COLONY CREEK-46 <>	61.9425	101328	1.74144	4.37315	0.528689	18.7843	2.40304	0.595782	2.34416	0.975498	3012.82	56.4197	3030.8	23.1708	3042.73	8.46511	3042.73	8.46511	99.0169

## Sheet: master
	SL		std				10	68err	10	67err		30	disc	5	rev	1	6/4 fact	1000	cutoff	0.70798		0.722472		0.708051		(OK to accept)	SAMPLE CONCORDIA											AGES			STD CONCORDIA				564.197	1.26241e-06	564.014	0.671757
sample	serial	202 (int)	204 (int)	206 (int)	207 (int)	208 (int)	232 (intv)	238 (int)	206238	68 +/-	m68	206207	67 +/-	64	64 +/-	82	82 +/-	208204	84 +/-	6/8 age	±(Ma)	6/7 age	±(Ma)	8/2 age	±(Ma)	comment	7/5 ratio	±(%)	6/8 ratio	±(%)	errcorr	6/8 age	±(Ma)	6/7 age	±(Ma)	BEST AGE	±(Ma)	8/2 age	±(Ma)	7/5 ratio	±(%)	6/8 ratio	±(%)	errcorr	6/8 age	±(Ma)	6/7 age	±(Ma)	sample
std	363702		1e-07	0.025	0.0025	0.01	0.3	0.4	0.091	2		16.8	1	20000	50	0.028	1	40000	50	564.197	10.8043	564.014	23.5439	563.777	5.56256															0.743016	2.27358	0.0914652	2	0.879671	564.197	10.8043	564.014	23.5439	std
std	363704		1e-07	0.025	0.0025	0.01	0.3	0.4	0.091	2		16.8	1	20000	2	0.028	1	40000	2	564.197	10.8042	564.014	21.7996	563.777	5.55984															0.743016	2.2362	0.0914652	2	0.894375	564.197	10.8042	564.014	21.7996	std
CP40-27	363706		1e-07	0.025	0.0025	0.01	0.3	0.4	0.091	2		16.8	1	20000	10	0.028	1	40000	10	564.197	10.8042	564.014	21.9294	563.777	5.56003		0.743016	2.23888	0.0914652	2	0.893304	564.197	10.8042	564.014	21.9294	564.197	10.8042	563.777	5.56003										CP40-27
CP40-28	363708		1e-07	0.025	0.0025	0.01	0.3	0.4	0.091	2		16.8	1	20000	10	0.028	1	40000	10	564.197	10.8042	564.014	21.9294	563.777	5.56003		0.743016	2.23888	0.0914652	2	0.893304	564.197	10.8042	564.014	21.9294	564.197	10.8042	563.777	5.56003										CP40-28
CP40-29	363710		1e-07	0.025	0.0025	0.01	0.3	0.4	0.091	2		16.8	1	20000	10	0.028	1	40000	10	564.197	10.8042	564.014	21.9294	563.777	5.56003		0.743016	2.23888	0.0914652	2	0.893304	564.197	10.8042	564.014	21.9294	564.197	10.8042	563.777	5.56003										CP40-29
CP40-30	363712		1e-07	0.025	0.0025	0.01	0.3	0.4	0.091	2		16.8	1	20000	10	0.028	1	40000	10	564.197	10.8042	564.014	21.9294	563.777	5.56003		0.743016	2.23888	0.0914652	2	0.893304	564.197	10.8042	564.014	21.9294	564.197	10.8042	563.777	5.56003										CP40-30
std	363714		1e-07	0.025	0.0025	0.01	0.3	0.4	0.091	2		16.8	1	20000	10	0.028	1	40000	10	564.197	10.8042	564.014	21.9294	563.777	5.56003															0.743016	2.23888	0.0914652	2	0.893304	564.197	10.8042	564.014	21.9294	std
CP40-32	363716		1e-07	0.025	0.0025	0.01	0.3	0.4	0.091	2		16.8	1	20000	10	0.028	1	40000	10	564.197	10.8042	564.014	21.9294	563.777	5.56003		0.743016	2.23888	0.0914652	2	0.893304	564.197	10.8042	564.014	21.9294	564.197	10.8042	563.777	5.56003										CP40-32
CP40-33	363718		1e-07	0.025	0.0025	0.01	0.3	0.4	0.091	2		16.8	1	20000	10	0.028	1	40000	10	564.197	10.8042	564.014	21.9294	563.777	5.56003		0.743016	2.23888	0.0914652	2	0.893304	564.197	10.8042	564.014	21.9294	564.197	10.8042	563.777	5.56003										CP40-33
CP40-34	363720		1e-07	0.025	0.0025	0.01	0.3	0.4	0.091	2		16.8	1	20000	10	0.028	1	40000	10	564.197	10.8042	564.014	21.9294	563.777	5.56003		0.743016	2.23888	0.0914652	2	0.893304	564.197	10.8042	564.014	21.9294	564.197	10.8042	563.777	5.56003										CP40-34
CP40-35	363722		1e-07	0.025	0.0025	0.01	0.3	0.4	0.091	2		16.8	1	20000	10	0.028	1	40000	10	564.197	10.8042	564.014	21.9294	563.777	5.56003		0.743016	2.23888	0.0914652	2	0.893304	564.197	10.8042	564.014	21.9294	564.197	10.8042	563.777	5.56003										CP40-35
std	363724		1e-07	0.025	0.0025	0.01	0.3	0.4	0.091	2		16.8	1	20000	10	0.028	1	40000	10	564.197	10.8042	564.014	21.9294	563.777	5.56003															0.743016	2.23888	0.0914652	2	0.893304	564.197	10.8042	564.014	21.9294	std
CP40-37	363726		1e-07	0.025	0.0025	0.01	0.3	0.4	0.091	2		16.8	1	20000	10	0.028	1	40000	10	564.197	10.8042	564.014	21.9294	563.777	5.56003		0.743016	2.23888	0.0914652	2	0.893304	564.197	10.8042	564.014	21.9294	564.197	10.8042	563.777	5.56003										CP40-37
CP40-38	363728		1e-07	0.025	0.0025	0.01	0.3	0.4	0.091	2		16.8	1	20000	10	0.028	1	40000	10	564.197	10.8042	564.014	21.9294	563.777	5.56003		0.743016	2.23888	0.0914652	2	0.893304	564.197	10.8042	564.014	21.9294	564.197	10.8042	563.777	5.56003										CP40-38
CP40-39	363730		1e-07	0.025	0.0025	0.01	0.3	0.4	0.091	2		16.8	1	20000	10	0.028	1	40000	10	564.197	10.8042	564.014	21.9294	563.777	5.56003		0.743016	2.23888	0.0914652	2	0.893304	564.197	10.8042	564.014	21.9294	564.197	10.8042	563.777	5.56003										CP40-39
std	363732		1e-07	0.025	0.0025	0.01	0.3	0.4	0.091	2		16.8	1	20000	10	0.028	1	40000	10	564.197	10.8042	564.014	21.9294	563.777	5.56003															0.743016	2.23888	0.0914652	2	0.893304	564.197	10.8042	564.014	21.9294	std
CP40-41	363734		1e-07	0.025	0.0025	0.01	0.3	0.4	0.091	2		16.8	1	20000	10	0.028	1	40000	10	564.197	10.8042	564.014	21.9294	563.777	5.56003		0.743016	2.23888	0.0914652	2	0.893304	564.197	10.8042	564.014	21.9294	564.197	10.8042	563.777	5.56003										CP40-41
CP40-42	363736		1e-07	0.025	0.0025	0.01	0.3	0.4	0.091	2		16.8	1	20000	10	0.028	1	40000	10	564.197	10.8042	564.014	21.9294	563.777	5.56003		0.743016	2.23888	0.0914652	2	0.893304	564.197	10.8042	564.014	21.9294	564.197	10.8042	563.777	5.56003										CP40-42
std	363738		1e-07	0.025	0.0025	0.01	0.3	0.4	0.091	2		16.8	1	20000	10	0.028	1	40000	10	564.197	10.8042	564.014	21.9294	563.777	5.56003															0.743016	2.23888	0.0914652	2	0.893304	564.197	10.8042	564.014	21.9294	std
[truncated: 103 more columns]
